# Supplementary material
Source: Royal Society of Chemistry journal article supplement (doi:10.1039/d6ob00282j)
Supplement: d6ob00282j1.pdf [file d6ob00282j1.pdf]

## Supporting Information for

### Enantioselective synthesis of chiral organoborons via carbene B-H insertion catalyzed by engineered neuroglobin

Xin Shan <sup>1</sup>, Li-Juan Sun <sup>2</sup>, Huamin Wang <sup>1\*</sup>, Shu-Qin Gao <sup>1,3</sup> and Ying-Wu Lin <sup>1,3\*</sup>

<sup>1</sup> *School of Chemistry and Chemical Engineering, University of South China, Hengyang 421001, China;*

<sup>2</sup> *Chongqing Youth Vocational & Technical College, Chongqing, 400712, China;*

<sup>3</sup> *Hengyang Medical School, University of South China, Hengyang 421001, China*

Corresponding authors:

\*E-mail: [ywlin@usc.edu.cn](mailto:ywlin@usc.edu.cn); [huaminwang@usc.edu.cn](mailto:huaminwang@usc.edu.cn).

## Contents

|                                                                                                                                   |         |
|-----------------------------------------------------------------------------------------------------------------------------------|---------|
| 1. Experimental Section                                                                                                           |         |
| 1.1 Materials and Methods                                                                                                         | pS3     |
| 1.2 Protein Expression and Purification                                                                                           | pS3     |
| 1.3 B-H Insertion Reactions                                                                                                       | pS4     |
| 1.4 UV-Vis Spectroscopy                                                                                                           | pS4     |
| 1.5 Molecular Simulation and Docking Studies                                                                                      | pS4     |
| 1.6 Synthesis of Racemic Organoborane Products                                                                                    | pS5     |
| 1.7 HPLC Standard Curves for Organoborane Products                                                                                | pS5     |
| <b>Table S1.</b> Catalytic activity and enantioselectivity of engineered Ngb variants.                                            | pS6     |
| <b>Table S2.</b> Docking energies for py-BH <sub>3</sub> binding to the MDPB-CSFM Ngb complex.                                    | pS7     |
| <b>Figure S1.</b> ESI-MS spectra of CSFM Ngb.                                                                                     | pS7     |
| <b>Figure S2.</b> UV-vis spectra of CSFM Ngb in various redox forms, the MDPB-bound state, and after py-BH <sub>3</sub> addition. | pS8     |
| <b>Figure S3.</b> Calibration curves for products.                                                                                | pS9-11  |
| <b>Figure S4.</b> Chiral HPLC traces for products.                                                                                | pS11-19 |
| 2. NMR data and spectra of the products.                                                                                          | pS20-50 |
| <b>References</b>                                                                                                                 | pS51    |

## 1 Experimental Section

### 1.1 Materials and Methods

Unless otherwise noted, all chemicals and reagents were obtained from commercial suppliers and used without further purification. Silica gel chromatography purifications were carried out using silica gel.  $^1\text{H}$ ,  $^{11}\text{B}$  and  $^{13}\text{C}$  NMR spectra were recorded on Bruker ANANCE NEO 500 MHz, 160 MHz and 126 MHz, respectively. Chemical shifts were determined relative to internal standard TMS at 0.0 ppm. Chemical shifts are expressed in parts per million (ppm), and coupling constants are in Hertz (Hz). The following abbreviations were used to indicate the corresponding multiplicities: s = singlet, d = doublet, t = triplet, q = quartet, m = multiplet, br = broad.

High-resolution mass spectra (HRMS) were recorded on a G2-XS QTOF mass spectrometer (Waters) using ESI. The calibration curves were determined by HPLC (Shimadzu LC-16, GL1F-3P C18 5  $\mu\text{m}$ , 4.6 $\times$ 150 mm, 25 $^\circ\text{C}$ , UV 254 nm, flow rate = 0.6-0.8 mL/min, MeCN/H<sub>2</sub>O = 60/40). The *ee* and *e.r.* values of compounds were determined by chiral HPLC (Shimadzu LC-16, CHIRALCEL OD-3 and ADH, 3  $\mu\text{m}$ , 4.6 $\times$ 250 mm, 25 $^\circ\text{C}$ , UV 254 nm, flow rate = 1.0 mL/min, Hexane/*i*-PrOH = 95/5–80/20).

### 1.2 Protein Expression and Purification

#### 1.2.1 Protein expression

Chemically competent *E. coli* BL21(DE3) cells were transformed with a pET3a expression vector carrying wild-type (WT) Ngb or its mutants. Single colonies were picked and inoculated into a starter culture in 5 mL of fresh LB medium containing 100  $\mu\text{g}/\text{mL}$  ampicillin. The 3 mL overnight culture was then transferred to a 3 L fresh rich medium containing 100  $\mu\text{g}/\text{mL}$  ampicillin and 10 mM 5-aminolevulinic acid hydrochloride (ALA). The culture was grown at 37 $^\circ\text{C}$  and shaken at 220 rpm for 12 h. Protein expression was induced by adding isopropyl  $\beta$ -D-1-thiogalactopyranoside (IPTG) to a final concentration of 0.4 mM for an additional 12 h. Cells were then harvested by centrifugation (6000 rpm) at 4 $^\circ\text{C}$  for 5 min.

#### 1.2.2 Protein purification

The harvested cell pellets were resuspended in 80 mL KPi buffer (20 mM potassium phosphate buffer, pH 7.0) and lysed by ultrasonication (40% power, 5 sec on, 5 sec off, 60 min) on ice. The crude lysates were centrifuged (10000 rpm) at 4  $^\circ\text{C}$  for 15 min, and the pellets were discarded. The supernatant was precipitated with 30-60%  $(\text{NH}_4)_2\text{SO}_4$ . Pellets containing Ngb were dissolved in 20 mM KPi (pH 7.0) and concentrated to 10 mL. The Ngb was then loaded on a HiPrep<sup>TM</sup> 26/60 Sephacryl S-100 Gel filtration column (GE Healthcare) equilibrated with 100 mM KPi buffer (pH 7.0). The fraction containing Ngb was collected and oxidized by  $\text{K}_3[\text{Fe}(\text{CN})_6]$ , which was further loaded on a HiPrep<sup>TM</sup> DEAE FF 16/10 column (GE Healthcare) equilibrated with 20 mM KPi buffer (pH 7.0) and eluted with 100 mM KPi (pH 7.0). Purified Ngb proteins were stored at -20 $^\circ\text{C}$ .

### 1.3 B-H Insertion Reactions

#### 1.3.1 B-H insertion reaction catalyzed by purified Ngb mutants

Initial reactions were carried out on a 1 mL scale using purified Ngb mutants (40  $\mu$ M), 5 mM borane substrates, 7.5 mM diazo esters and 20 mM sodium dithionite ( $\text{Na}_2\text{S}_2\text{O}_4$ ) in a  $\text{N}_2$  atmosphere.  $\text{Na}_2\text{S}_2\text{O}_4$  was dissolved in 50 mM KPi buffer (pH 7.0, 0.2 M stock solution).

Typical procedure: 100  $\mu$ L of  $\text{Na}_2\text{S}_2\text{O}_4$  (20  $\mu$ mol, 4.0 equiv) stock solution was added to the 750  $\mu$ L of purified Ngb solution (0.04  $\mu$ mol). Reactions were initiated by adding 100  $\mu$ L of borane substrates (5  $\mu$ mol, 1.0 equiv), followed by adding 50  $\mu$ L of diazo esters (7.5  $\mu$ mol, 1.5 equiv). The mixture was stirred at room temperature for 12 h in a  $\text{N}_2$  atmosphere, and the reaction was quenched by the addition of 10  $\mu$ L of 3 M hydrochloric acid (HCl). The reaction mixture was diluted 2-fold with MeCN, and the yields of these compounds were determined by HPLC. After extraction, concentration and purification, the e.r. values of these compounds were determined by chiral HPLC.

#### 1.3.2 Preparative-scale reactions

In a typical preparative-scale reaction procedure, a solution (100 mL) containing 0.7 g  $\text{Na}_2\text{S}_2\text{O}_4$  (4 mmol, 4.0 equiv) and A15C/H64S/V68F/F28M Ngb (CSFM Ngb, 8  $\mu$ mol) in 50 mM KPi buffer (pH 7.0) was stirred for 1 min. The reaction was initiated by adding 4 mL of borane substrates (1 mmol, 1.0 equiv) and 4 mL of diazo esters (1.5 mmol, 1.5 equiv), both dissolved in MeCN. The mixture was stirred at room temperature for 12 h under  $\text{N}_2$ , then extracted with dichloromethane (3 $\times$ 200 mL). The organic phase was evaporated under reduced pressure, and the residue was purified by flash column chromatography (Silica gel, PE/EA = 10/1–5/1) to give the corresponding products.

### 1.4 UV-Vis Spectroscopy

UV-Vis spectra were recorded on a Hewlett-Packard 8453 diode array spectrometer. Ferrous CSFM Ngb was obtained by adding  $\text{Na}_2\text{S}_2\text{O}_4$  (7 mg) to the ferric CSFM Ngb solution (10  $\mu$ M, 2 mL) for 1 min. The diazo compound was dissolved in MeCN (20 mM) and added dropwise to the ferrous CSFM Ngb to a final concentration of 100  $\mu$ M to produce the MDPB-CSFM Ngb complex. Spectra were recorded after the addition of diazo compounds for 3 min. The py-BH<sub>3</sub> was dissolved in MeCN (20 mM) and added dropwise to a final concentration of 100  $\mu$ M in MDPB-CSFM Ngb complex. Spectra were recorded after the addition of py-BH<sub>3</sub> for 5 min.

### 1.5 Molecular Simulation and Docking Studies

The initial structure of A15C/H64S/V68F/F28M Ngb was generated from the X-ray structure of A15C Ngb (PDB code 7VQG)<sup>1</sup> using program VMD 1.9.<sup>2</sup> A patch of disulfide bond was applied to both Cys46-Cys55 and Cys15-Cys120. The structure of MDPB was obtained from the X-ray structure of carbene-bound *Rma* TED (PDB code 6CUN).<sup>3</sup> A patch of axial ligands (MDPB and His96) was then applied to the ferrous heme iron. The protein was solvated in a cubic box of TIP3 water, followed by the addition of counter ions ( $\text{Na}^+$  and  $\text{Cl}^-$ ) to obtain the physiological ionic strength of 0.15 M. The resulting complex system was minimized with NAMD 2.9 (Nanoscale Molecular Dynamics),<sup>4</sup> using 1000 minimization steps with the conjugate gradient

method at 0 K, and equilibrated for 100,000 molecular dynamics steps (1 fs per step) at 300 K, then further minimized for 1000 steps at 0 K.

The simulated structure of carbene-bound A15C/H64S/V68F/F28M Ngb was used as the initial structure for docking with py-BH<sub>3</sub> using the Autodock 4 program.<sup>5</sup> The heme iron was set as the center, with a box size of ~80 Å × 80 Å × 90 Å, which covered most of the protein surface. Amino acid residues Met28, Ser64, and Phe68 on the protein surface near the active heme site, and the heme axial ligand MDPB were set as flexible residues. Docked conformations were automatically ranked by Autodock 4 using a binding-energy scoring function. The docking results (10 most favorable conformations) after 2000 steps were then visualized and analyzed using VMD 1.9.<sup>2</sup>

### **1.6 Synthesis of Racemic Organoborane Products**

Racemic standard references of organoborane products were prepared *via* Rh-catalyzed B-H insertion reactions using procedures slightly modified from a previously reported method.<sup>6</sup> Namely, a 4 mL vial with screw cap and PTFE septum was charged with a borane substrate (0.5 mmol, 1 eq.) and Rh<sub>2</sub>(OAc)<sub>4</sub> (11 mg, 5 mol%). The vial was evacuated and backfilled with N<sub>2</sub> three times, and 1 mL of anhydrous CH<sub>2</sub>Cl<sub>2</sub> was added. A CH<sub>2</sub>Cl<sub>2</sub> solution (1 mL) of the diazo compound (0.6 mmol) was slowly added to the reaction mixture, which was then stirred for 12 h at room temperature under N<sub>2</sub>. The crude reaction mixture was purified by flash chromatography (dry loading) using EtOAc and petroleum ether as eluents.

### **1.7 HPLC Standard Curves for Organoborane Products**

Product formation in enzymatic reactions was quantified by HPLC based on standard curves. To determine the standard calibration curves, stock solutions of chemically synthesized racemic products were prepared at various concentrations (0.25-10 mM in MeCN). All data points represent the average of duplicate runs. The standard curves are plots of product concentration in mM (x-axis) versus area/10<sup>7</sup> (y-axis).

**Table S1.** Catalytic activity and enantioselectivity of engineered Ngb variants in the B-H insertion reaction with pyridine borane (py-BH<sub>3</sub>) and methyl 2-diazo-4-phenylbutanoate (MDPB).

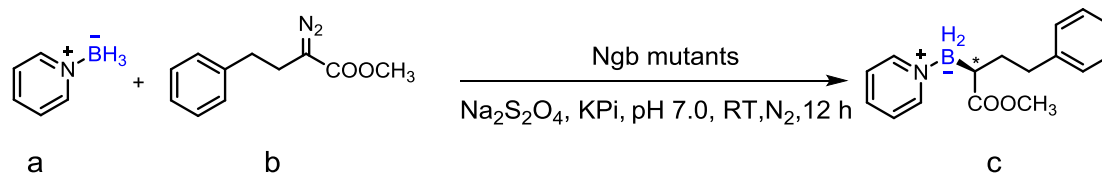

| Entry | Catalyst            | <i>ee</i> (%) | Yield (%) |
|-------|---------------------|---------------|-----------|
| 1     | WT                  | 25            | 15        |
| 2     | A15C                | 33            | 18        |
| 3     | A15C/H64G           | 22            | 24        |
| 4     | A15C/H64V           | 43            | 49        |
| 5     | A15C/H64S           | 50            | 55        |
| 6     | A15C/H64D           | 43            | 39        |
| 7     | A15C/H64S/V68F      | 64            | 30        |
| 8     | A15C/H64S/V68F/F28M | 94            | 60        |
| 9     | A15C/H64V/V68F/F28M | 83            | 45        |
| 10    | A15C/H64G/V68F/F28M | 15            | 33        |

**Reaction Conditions:** 5 mM py-BH<sub>3</sub>, 7.5 mM MDPB, 20 mM Na<sub>2</sub>S<sub>2</sub>O<sub>4</sub>, 40 μM Ngb, 50 mM KPi (15% MeCN, pH 7.0), RT, and 12 h under N<sub>2</sub>. Yields were determined based on an HPLC calibration curve with racemic standards. The *ee* values were determined by chiral HPLC.

**Table S2.** Docking energies of py-BH<sub>3</sub> binding to the complex of MDPB-CSFM Ngb.

| Model | E <sub>binding</sub> <sup>a</sup> | E <sub>inter-mol</sub> <sup>b</sup> | E <sub>vdw</sub> <sup>c</sup> | E <sub>total</sub> <sup>d</sup> | E <sub>electr</sub> <sup>e</sup> | E <sub>torsional</sub> <sup>f</sup> |
|-------|-----------------------------------|-------------------------------------|-------------------------------|---------------------------------|----------------------------------|-------------------------------------|
| 1     | -4.21                             | -4.49                               | -1.68                         | -10.47                          | 0.05                             | 0.27                                |
| 2     | -4.19                             | -4.47                               | -1.78                         | -10.28                          | 0.03                             | 0.27                                |
| 3     | -4.05                             | -4.32                               | -1.81                         | -10.75                          | -0.01                            | 0.27                                |
| 4     | -4.05                             | -4.32                               | -1.60                         | -10.67                          | 0.01                             | 0.27                                |
| 5     | -3.90                             | -4.18                               | -1.64                         | -10.52                          | 0.03                             | 0.27                                |
| 6     | -3.88                             | -4.15                               | -1.68                         | -10.26                          | 0.04                             | 0.27                                |
| 7     | -3.87                             | -4.15                               | -1.43                         | -11.24                          | 0.05                             | 0.27                                |
| 8     | -3.80                             | -4.08                               | -1.41                         | -10.96                          | 0.05                             | 0.27                                |
| 9     | -3.79                             | -4.06                               | -1.78                         | -11.13                          | 0.00                             | 0.27                                |
| 10    | -3.58                             | -3.86                               | -1.20                         | -11.23                          | 0.03                             | 0.27                                |

<sup>a</sup> Binding energy. <sup>b</sup> Intermolecular energy. <sup>c</sup> van der Waals energies. <sup>d</sup> total energy of the complex. <sup>e</sup> electrostatic energy. <sup>f</sup> torsional free energy. Unit: kcal/mol.

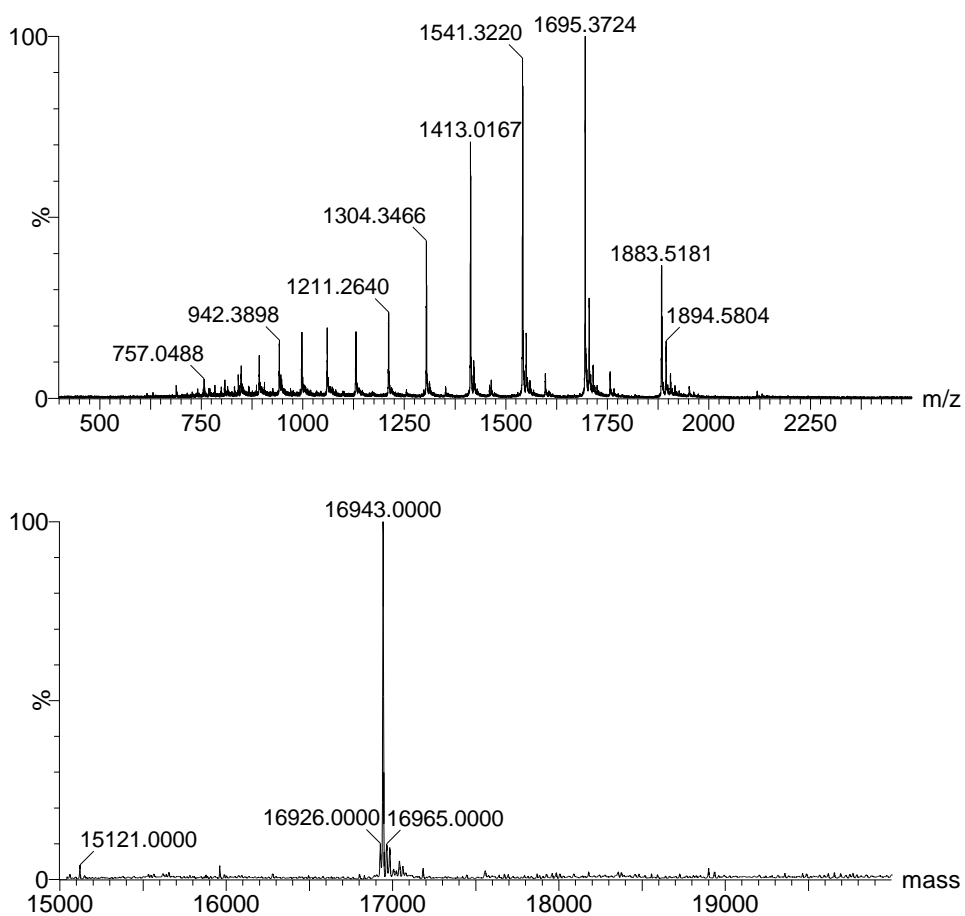

**Figure S1.** MS spectra of CSFM Ngb with two disulfide bonds; calculated: 16943.5 Da; observed: 16943.0  $\pm$  0.5 Da.

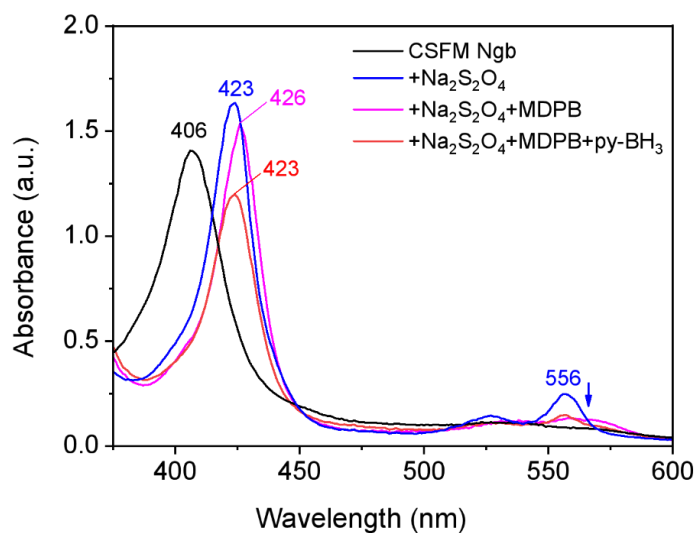

**Figure S2.** UV-vis spectra of CSFM Ngb: ferric (black), ferrous (blue), MDPB<sup>-</sup>-bound form (magenta), and following py-BH<sub>3</sub> addition to MDPB<sup>-</sup>-CSFM Ngb (red).

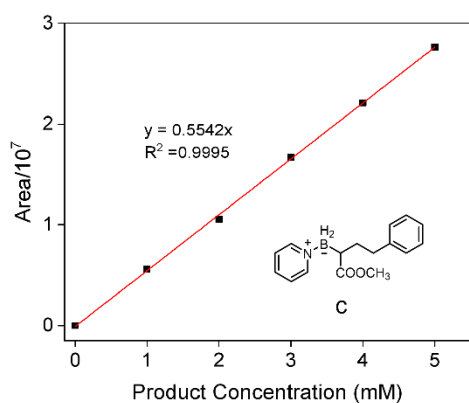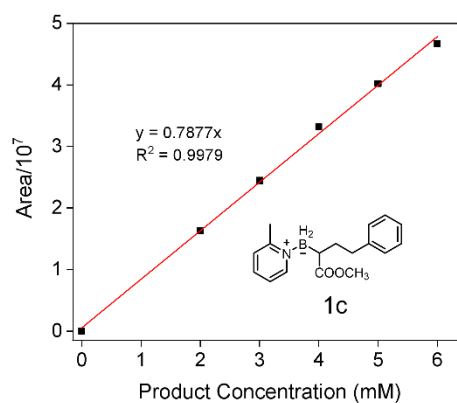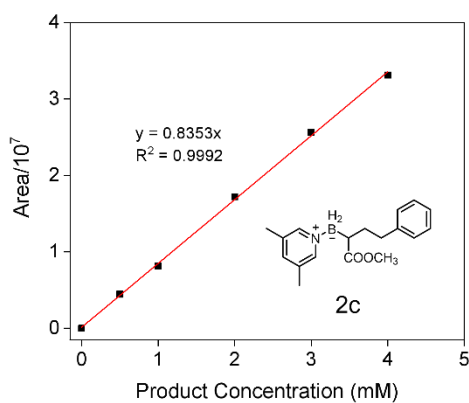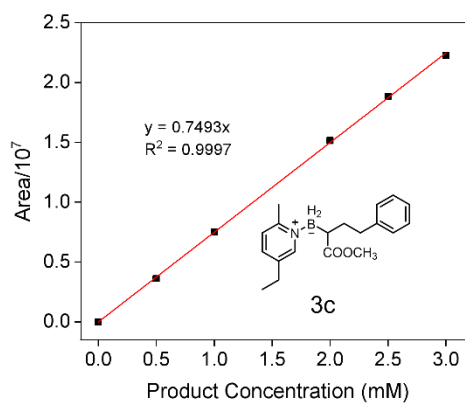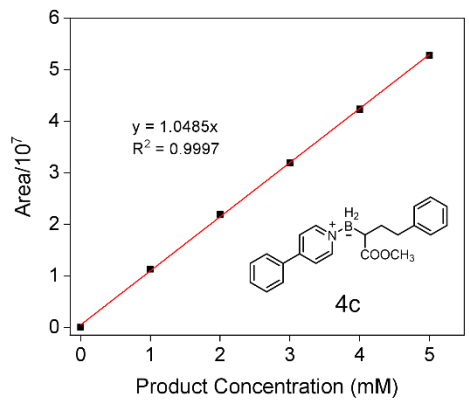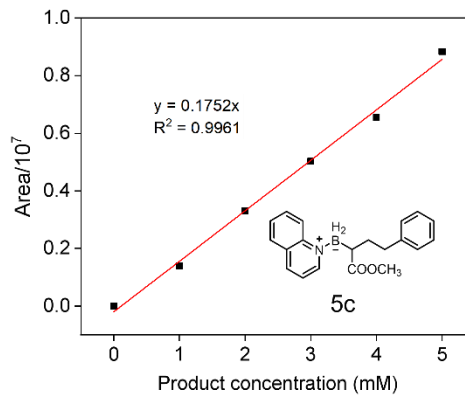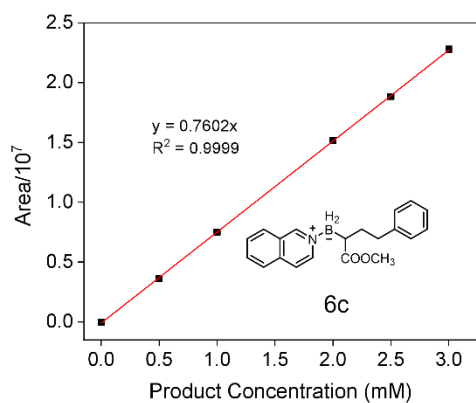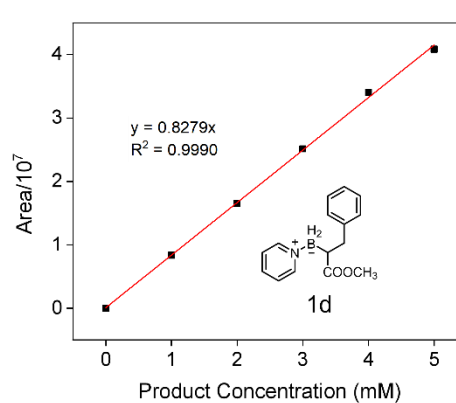

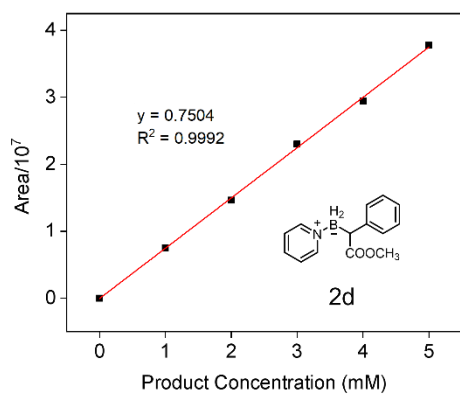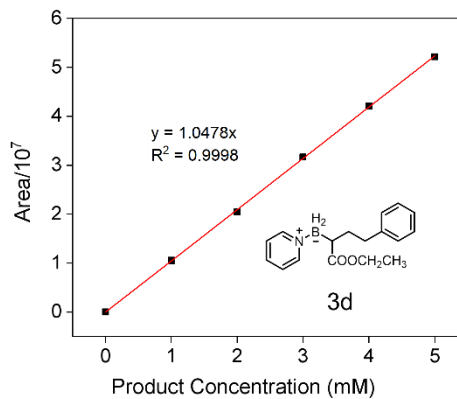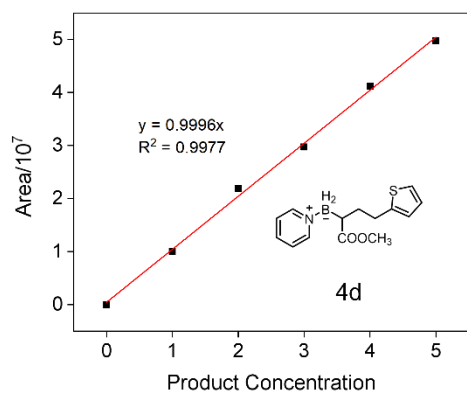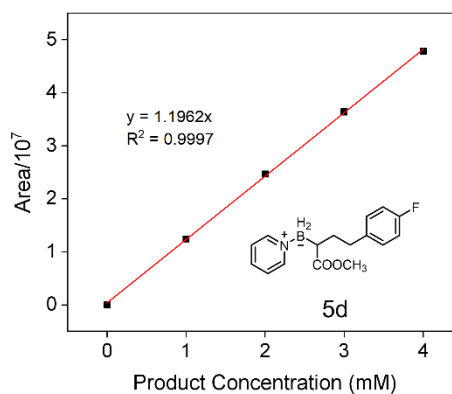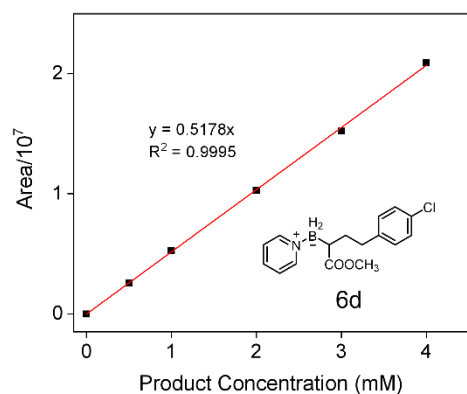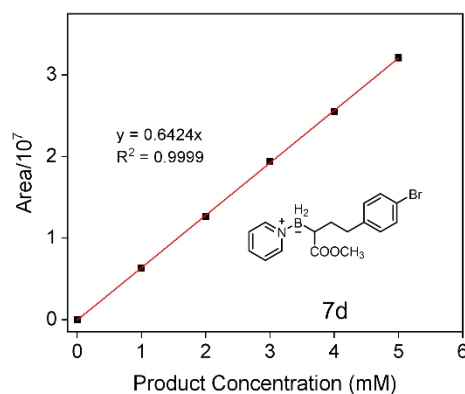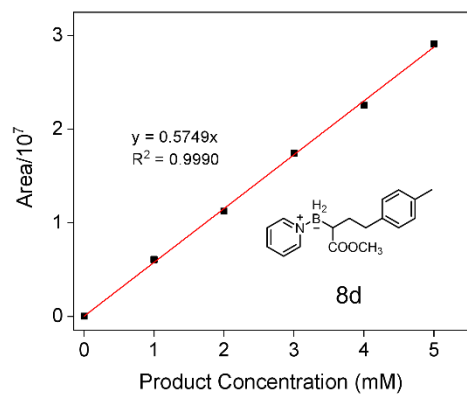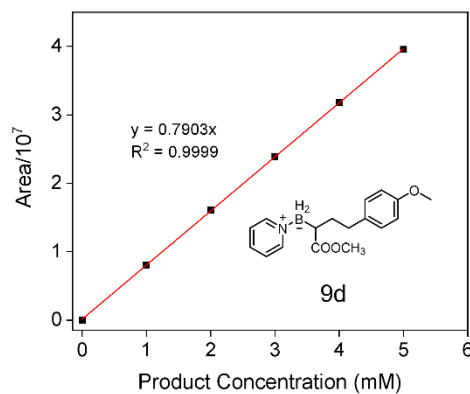

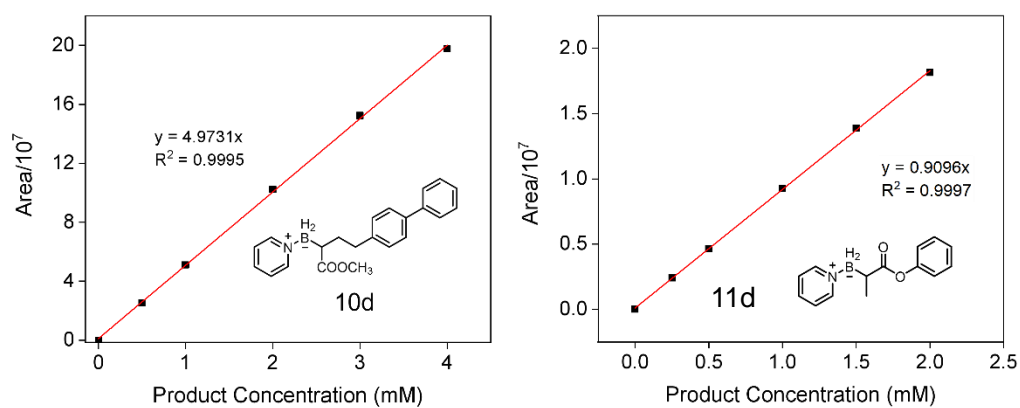

**Figure S3.** Calibration curves for products.

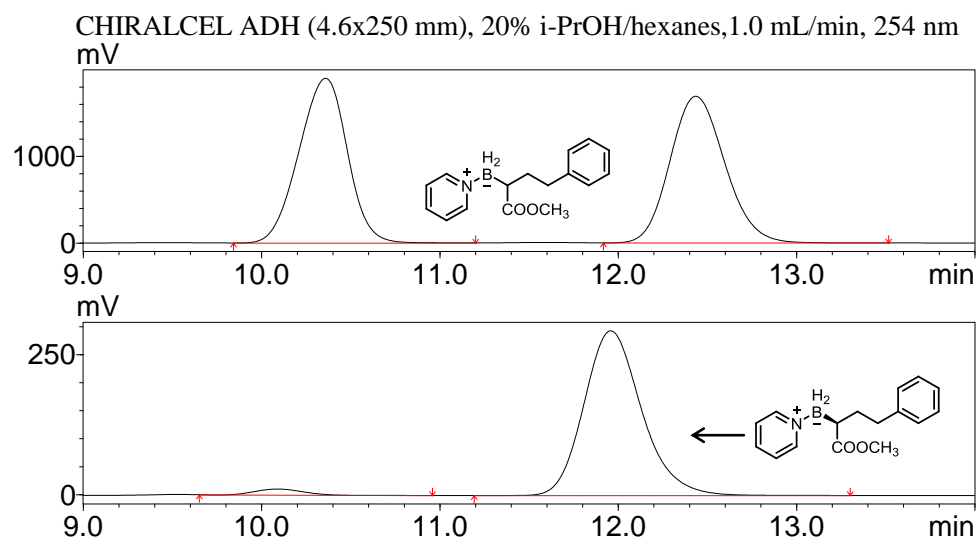

| <i>Rac-c</i>    |           |        | <i>R-c</i>      |           |        |
|-----------------|-----------|--------|-----------------|-----------|--------|
| Ret. Time (min) | Area (mv) | Area%  | Ret. Time (min) | Area (mv) | Area%  |
| 10.359          | 35948427  | 49.887 | 10.088          | 229133    | 3.349  |
| 12.435          | 36111159  | 50.113 | 11.958          | 6613214   | 96.651 |

CHIRALCEL ADH (4.6x250 mm), 12% i-PrOH/hexanes, 1.0 mL/min, 254 nm

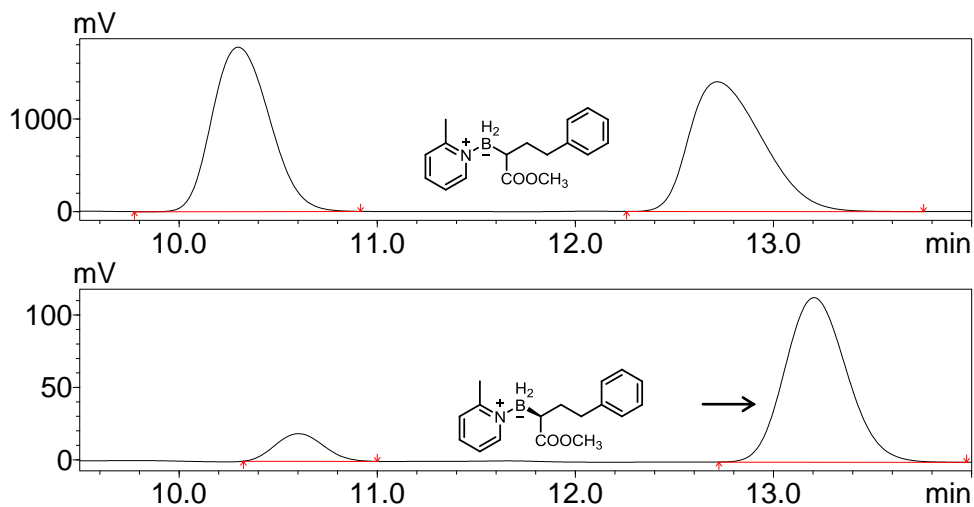

| <i>Rac-1c</i>   |           |        | <i>R-1c</i>     |           |        |
|-----------------|-----------|--------|-----------------|-----------|--------|
| Ret. Time (min) | Area (mv) | Area%  | Ret. Time (min) | Area (mv) | Area%  |
| 10.299          | 35620693  | 49.855 | 10.604          | 322919    | 11.610 |
| 12.717          | 35828360  | 50.145 | 13.205          | 2458485   | 88.390 |

CHIRALCEL ADH (4.6x250 mm), 20% i-PrOH/hexanes, 1.0 mL/min, 254 nm

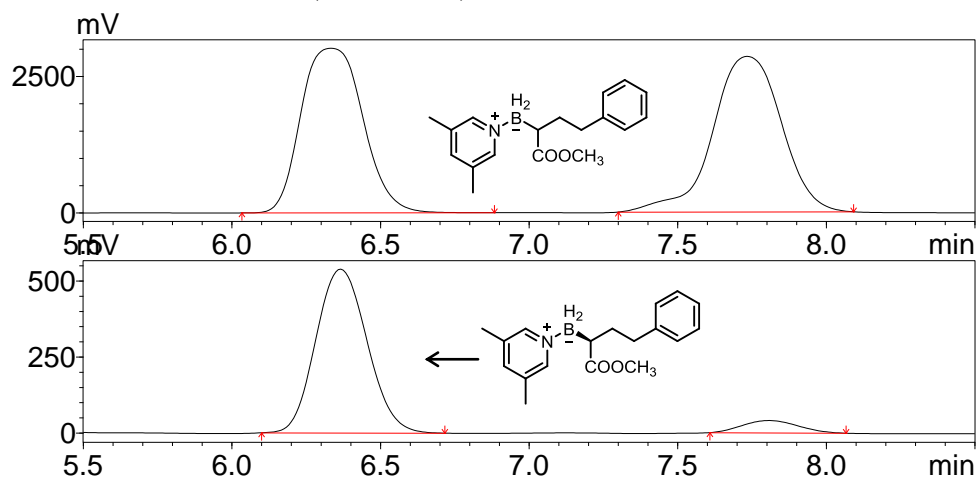

| <i>Rac-2c</i>   |           |        | <i>R-2c</i>     |           |        |
|-----------------|-----------|--------|-----------------|-----------|--------|
| Ret. Time (min) | Area (mv) | Area%  | Ret. Time (min) | Area (mv) | Area%  |
| 6.334           | 43554111  | 48.696 | 6.365           | 6461076   | 92.443 |
| 7.734           | 45886301  | 51.304 | 7.806           | 528144    | 7.557  |

CHIRALCEL OD-3 (4.6x250 mm), 20% i-PrOH/hexanes, 1.0 mL/min, 254 nm

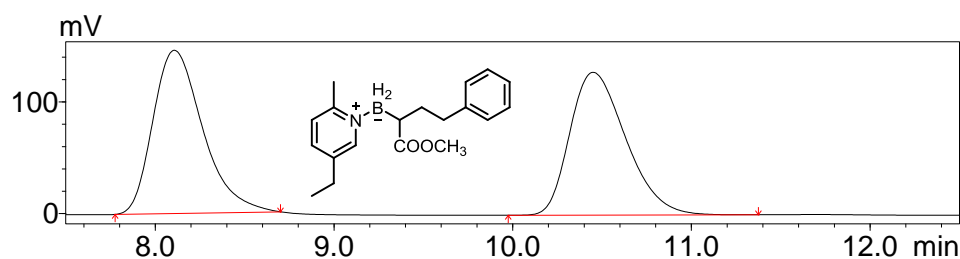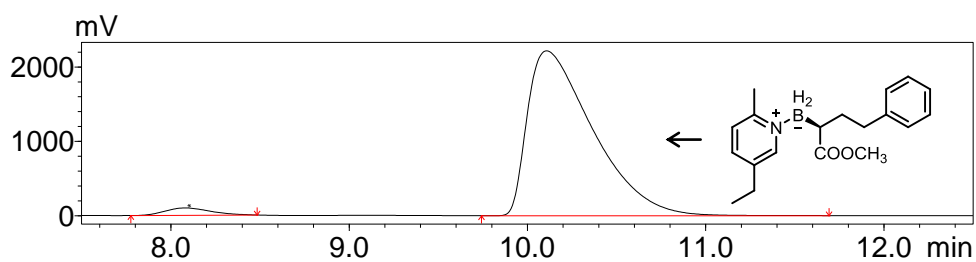

| <i>Rac-3c</i>   |           |        | <i>R-3c</i>     |           |        |
|-----------------|-----------|--------|-----------------|-----------|--------|
| Ret. Time (min) | Area (mv) | Area%  | Ret. Time (min) | Area (mv) | Area%  |
| 8.107           | 2834689   | 50.487 | 8.081           | 1750344   | 3.007  |
| 10.451          | 2780004   | 49.513 | 10.108          | 56464585  | 96.993 |

CHIRALCEL OD-3 (4.6x250 mm), 20% i-PrOH/hexanes, 1.0 mL/min,

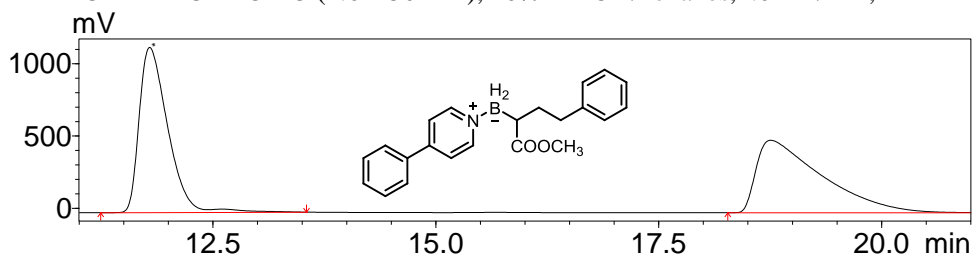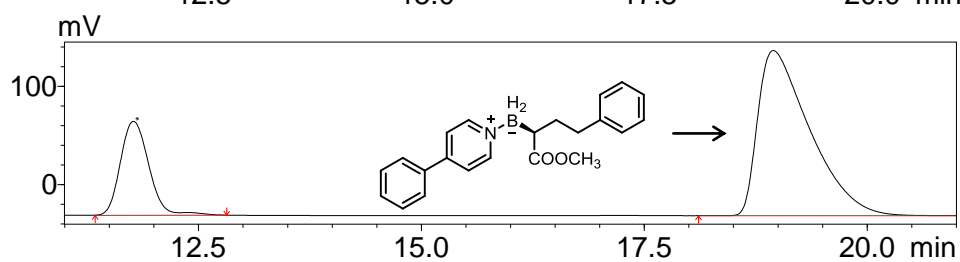

| <i>Rac-4c</i>   |           |        | <i>R-4c</i>     |           |        |
|-----------------|-----------|--------|-----------------|-----------|--------|
| Ret. Time (min) | Area (mv) | Area%  | Ret. Time (min) | Area (mv) | Area%  |
| 11.791          | 25517075  | 49.966 | 11.771          | 2114276   | 23.664 |
| 18.757          | 25551610  | 50.034 | 18.948          | 6820236   | 76.336 |

CHIRALCEL OD-3 (4.6x250 mm), 20% i-PrOH/hexanes, 1.0 mL/min, 254 nm

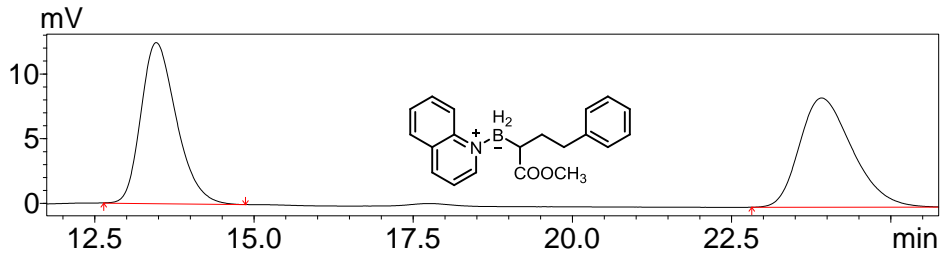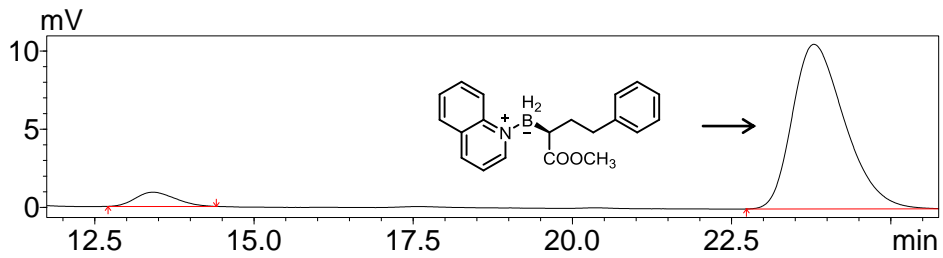

| <i>Rac-5c</i>   |           |        | <i>R-5c</i>     |           |        |
|-----------------|-----------|--------|-----------------|-----------|--------|
| Ret. Time (min) | Area (mv) | Area%  | Ret. Time (min) | Area (mv) | Area%  |
| 13.466          | 482827    | 49.863 | 13.415          | 39441     | 6.169  |
| 23.915          | 485485    | 50.137 | 23.795          | 599864    | 93.831 |

CHIRALCEL OD-3 (4.6x250 mm), 20% i-PrOH/hexanes, 1.0 mL/min, 254 nm

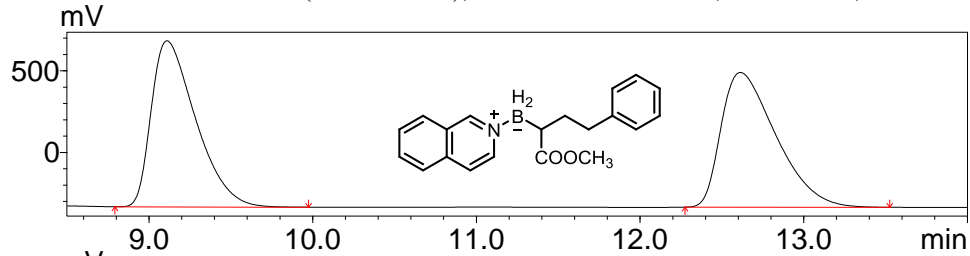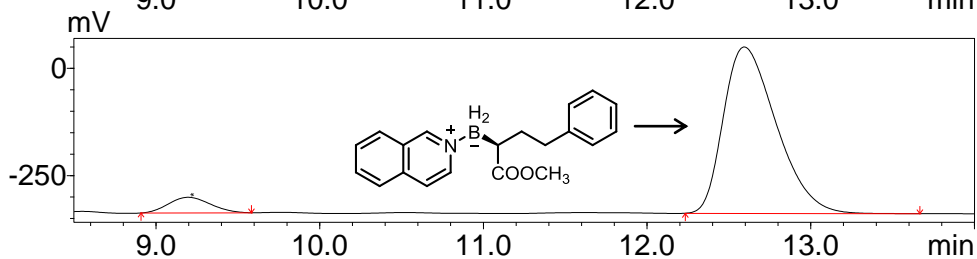

| <i>Rac-6c</i>   |           |        | <i>R-6c</i>     |           |        |
|-----------------|-----------|--------|-----------------|-----------|--------|
| Ret. Time (min) | Area (mv) | Area%  | Ret. Time (min) | Area (mv) | Area%  |
| 9.111           | 19208039  | 49.971 | 9.196           | 644114    | 6.884  |
| 12.613          | 19230333  | 50.029 | 12.594          | 8712221   | 93.116 |

CHIRALCEL OD-3 (4.6x250 mm), 20% i-PrOH/hexanes, 1.0 mL/min, 254 nm

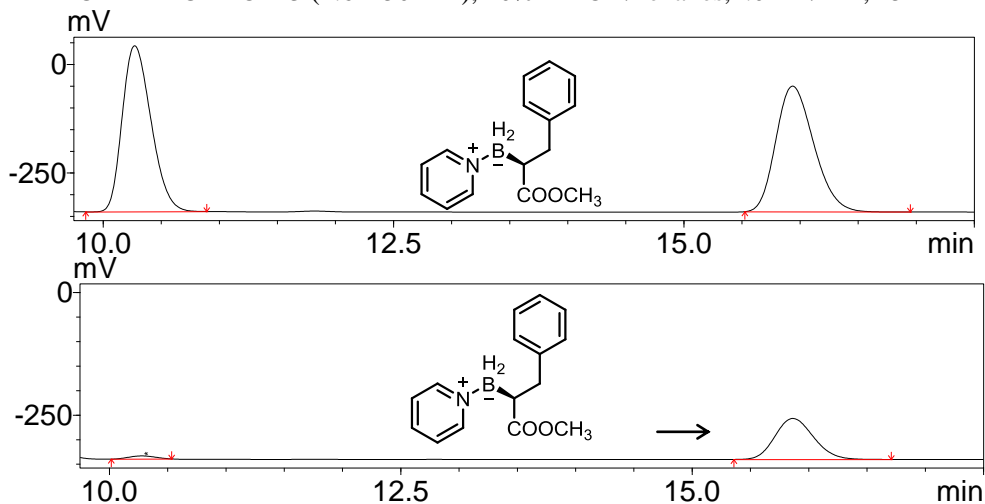

| <i>Rac-1d</i>   |           |        | <i>R-1d</i>     |           |        |
|-----------------|-----------|--------|-----------------|-----------|--------|
| Ret. Time (min) | Area (mv) | Area%  | Ret. Time (min) | Area (mv) | Area%  |
| 10.272          | 6595780   | 50.112 | 10.280          | 99839     | 4.935  |
| 15.936          | 6566343   | 49.888 | 15.864          | 1923220   | 95.065 |

CHIRALCEL ADH (4.6x250mm), 20% i-PrOH/hexanes, 1.0 mL/min, 254 nm

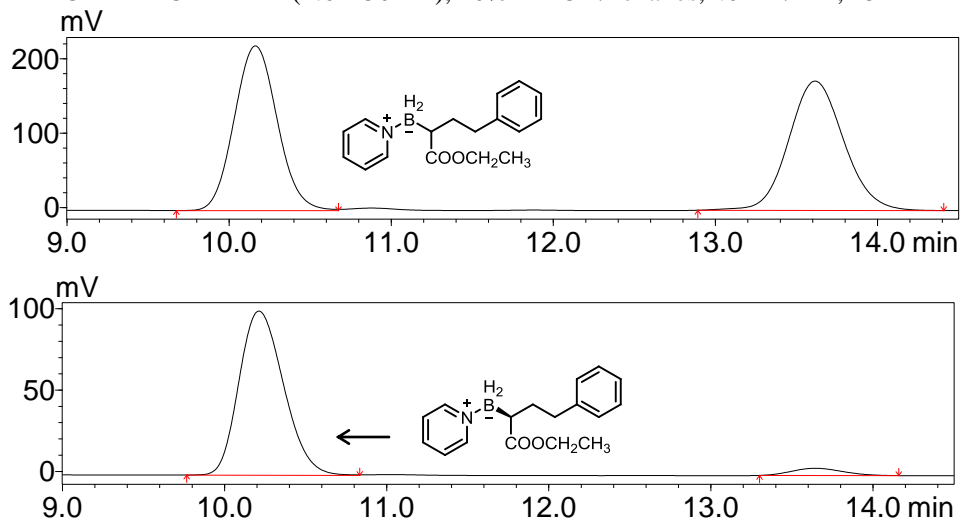

| <i>Rac-3d</i>   |           |        | <i>R-3d</i>     |           |        |
|-----------------|-----------|--------|-----------------|-----------|--------|
| Ret. Time (min) | Area (mv) | Area%  | Ret. Time (min) | Area (mv) | Area%  |
| 10.163          | 4075533   | 49.697 | 10.212          | 1923742   | 94.819 |
| 13.615          | 4125212   | 50.303 | 13.645          | 105112    | 5.181  |

CHIRALCEL OD-3 (4.6x250 mm), 20% i-PrOH/hexanes, 1.0 mL/min, 254 nm

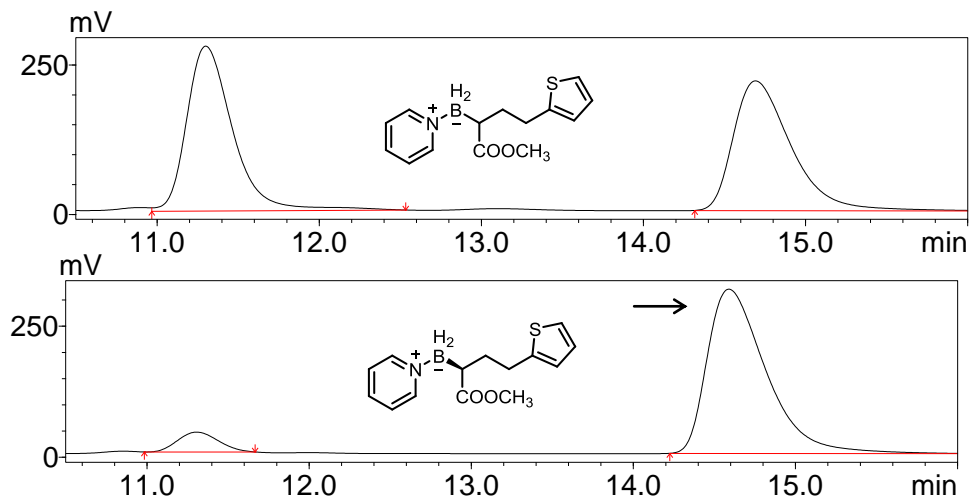

| <i>Rac-4d</i>   |           |        | <i>R-4d</i>     |           |        |
|-----------------|-----------|--------|-----------------|-----------|--------|
| Ret. Time (min) | Area (mv) | Area%  | Ret. Time (min) | Area (mv) | Area%  |
| 11.300          | 5442352   | 50.528 | 11.307          | 660079    | 7.720  |
| 14.692          | 5328673   | 49.472 | 14.590          | 7889828   | 92.280 |

CHIRALCEL OD-3 (4.6x250 mm), 20% i-PrOH/hexanes, 1.0 mL/min, 254 nm

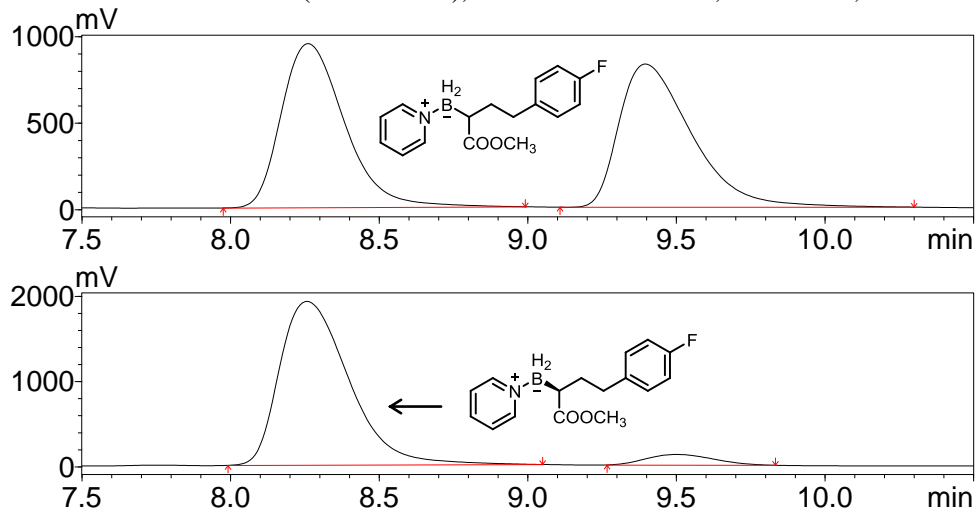

| <i>Rac-5d</i>   |           |        | <i>R-5d</i>     |           |        |
|-----------------|-----------|--------|-----------------|-----------|--------|
| Ret. Time (min) | Area (mv) | Area%  | Ret. Time (min) | Area (mv) | Area%  |
| 8.261           | 14051940  | 50.045 | 8.257           | 31143641  | 94.075 |
| 9.396           | 14026783  | 49.955 | 9.501           | 1961642   | 5.925  |

CHIRALCEL ADH (4.6x250 mm), 20% i-PrOH/hexanes, 1.0 mL/min, 254 nm  
mV

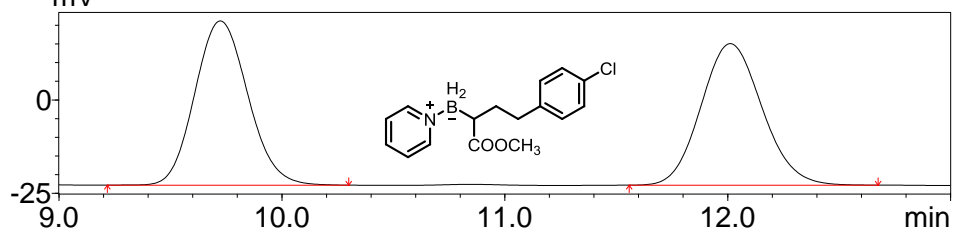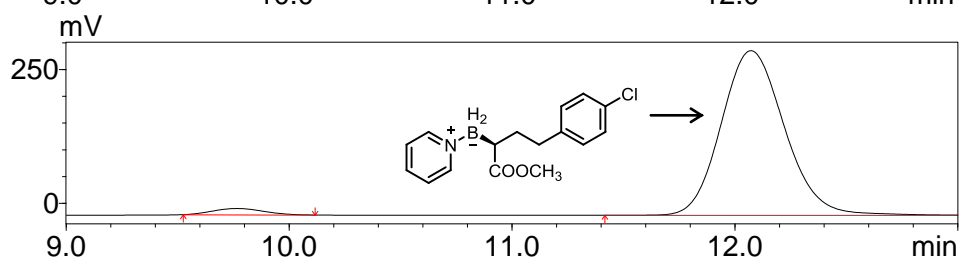

| <i>Rac-6d</i>   |           |        | <i>R-6d</i>     |           |        |
|-----------------|-----------|--------|-----------------|-----------|--------|
| Ret. Time (min) | Area (mv) | Area%  | Ret. Time (min) | Area (mv) | Area%  |
| 9.724           | 727796    | 50.184 | 9.765           | 186055    | 2.971  |
| 12.012          | 722468    | 49.816 | 12.072          | 6076567   | 97.029 |

CHIRALCEL OD-3 (4.6x250 mm), 20% i-PrOH/hexanes, 1.0 mL/min, 254 nm  
mV

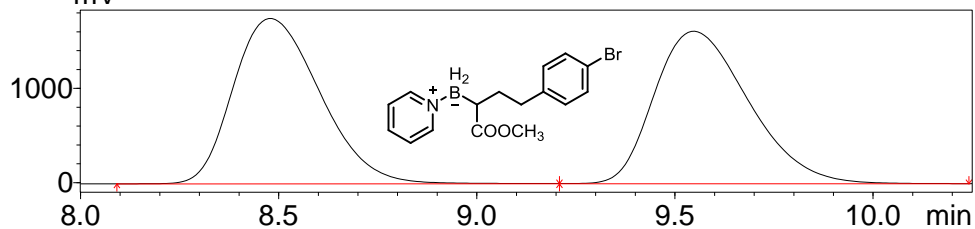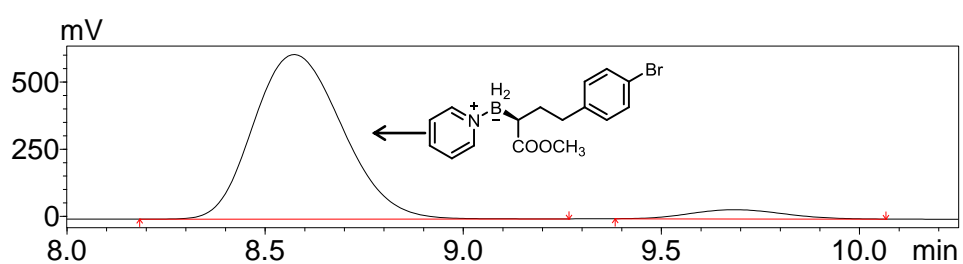

| <i>Rac-7d</i>   |           |        | <i>R-7d</i>     |           |        |
|-----------------|-----------|--------|-----------------|-----------|--------|
| Ret. Time (min) | Area (mv) | Area%  | Ret. Time (min) | Area (mv) | Area%  |
| 8.479           | 26750858  | 49.955 | 8.573           | 9549956   | 94.497 |
| 9.548           | 26799446  | 50.045 | 9.685           | 556155    | 5.503  |

CHIRALCEL OD-3 (4.6x250 mm), 20% i-PrOH/hexanes, 1.0 mL/min, 254 nm

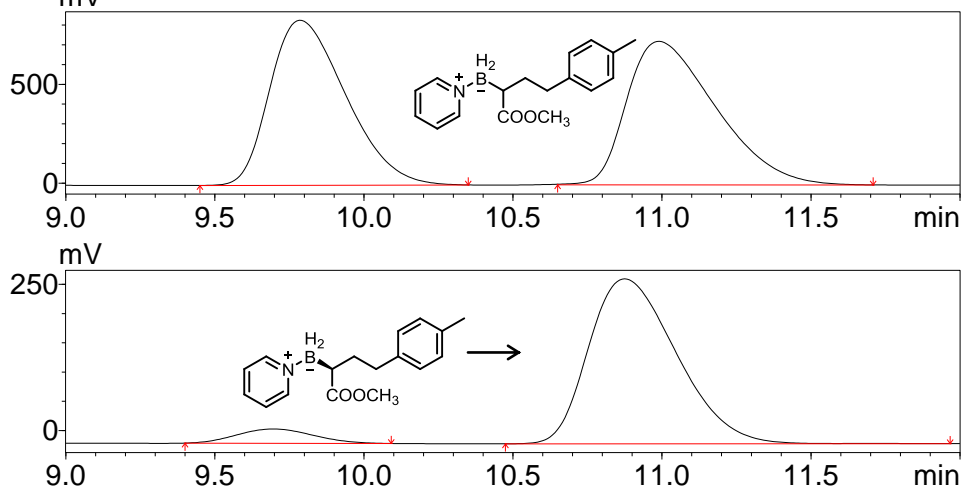

| <i>Rac-8d</i>   |           |        | <i>R-8d</i>     |           |        |
|-----------------|-----------|--------|-----------------|-----------|--------|
| Ret. Time (min) | Area (mv) | Area%  | Ret. Time (min) | Area (mv) | Area%  |
| 9.786           | 14783665  | 49.496 | 9.696           | 433446    | 6.998  |
| 10.990          | 15084495  | 50.504 | 10.875          | 5760416   | 93.002 |

CHIRALCEL ADH (4.6x250mm), 20% i-PrOH/hexanes, 1.0 mL/min, 254 nm

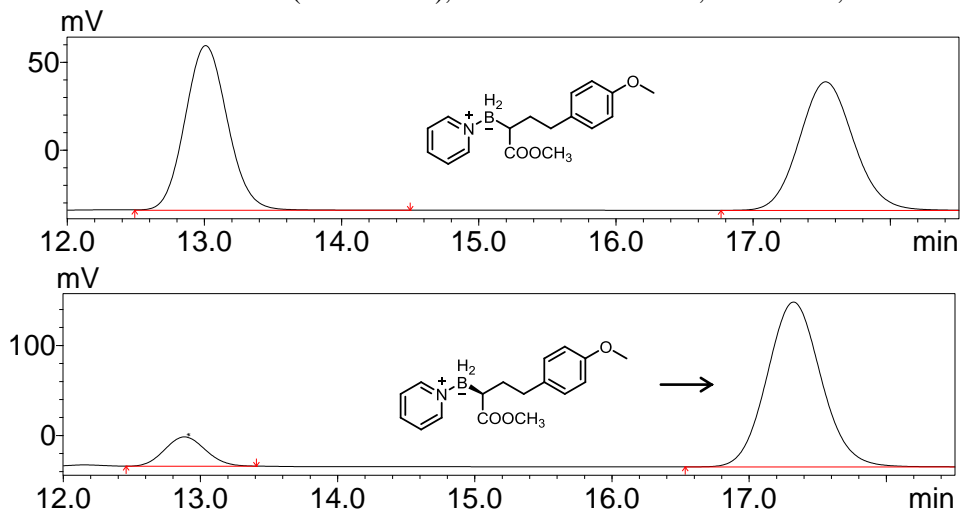

| <i>Rac-9d</i>   |           |        | <i>R-9d</i>     |           |        |
|-----------------|-----------|--------|-----------------|-----------|--------|
| Ret. Time (min) | Area (mv) | Area%  | Ret. Time (min) | Area (mv) | Area%  |
| 13.009          | 2012634   | 50.024 | 12.884          | 671097    | 11.810 |
| 17.530          | 2010694   | 49.976 | 17.324          | 5011191   | 88.190 |

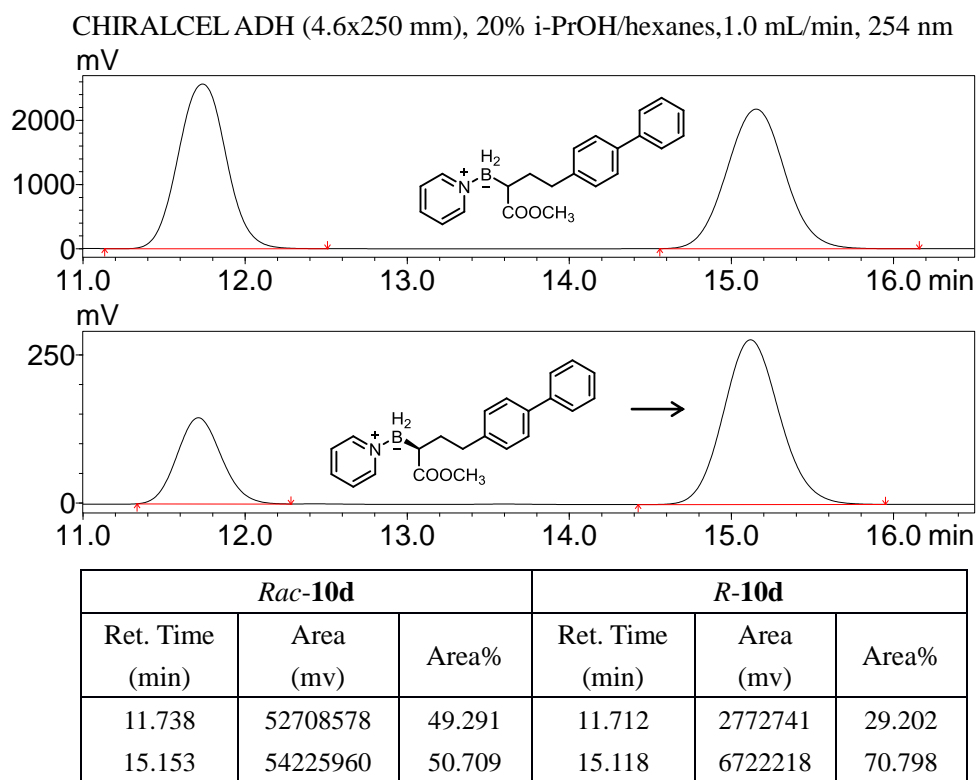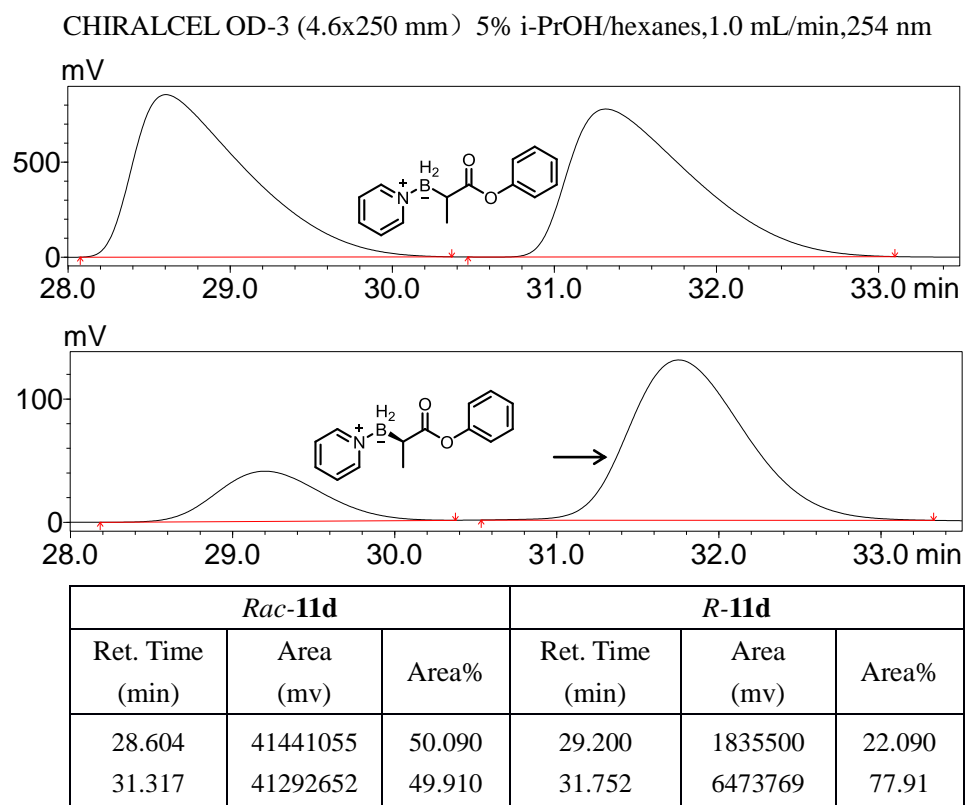

**Figure S4.** Chiral HPLC traces for products.

## 2. NMR data and spectra of the products.

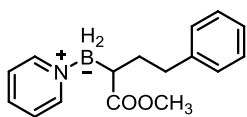

**(1-methoxy-1-oxo-4-phenylbutan-2-yl)(pyridin-1-ium-1-yl)boranuide (c).**  $^1\text{H}$  NMR (500 MHz,  $\text{CDCl}_3$ )  $\delta$  8.47 (d,  $J = 5.5$  Hz, 2H), 7.98 (t,  $J = 7.5$  Hz, 1H), 7.56 – 7.51 (m, 2H), 7.24 (dd,  $J = 12.5, 5.0$  Hz, 2H), 7.15 (dd,  $J = 16.0, 7.5$  Hz, 3H), 3.48 (s, 3H), 2.69 – 2.62 (m, 1H), 2.55 (m, 1H), 2.02 (dd,  $J = 9.5, 5.0$  Hz, 1H), 1.96 – 1.87 (m, 1H), 1.68 – 1.60 (m, 1H).  $^{13}\text{C}$  NMR (126 MHz,  $\text{CDCl}_3$ )  $\delta$  181.03, 147.41, 143.27, 139.99, 128.60, 128.11, 125.38, 125.26, 50.42, 40.99, 36.48, 32.40.  $^{11}\text{B}$  NMR (160 MHz,  $\text{CDCl}_3$ )  $\delta$  -5.82. HRMS (ESI)  $m/z$   $[\text{M}+\text{Na}]^+$  calculated for  $\text{C}_{16}\text{H}_{22}\text{BNO}_2\text{Na}$ : 292.1485, observed: 292.1489.

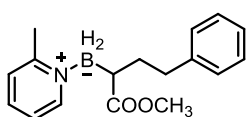

**(1-methoxy-1-oxo-4-phenylbutan-2-yl)(2-methylpyridin-1-ium-1-yl)boranuide (1c).**  $^1\text{H}$  NMR (500 MHz,  $\text{CDCl}_3$ )  $\delta$  8.50 (d,  $J = 5.5$  Hz, 1H), 7.82 (td,  $J = 7.5, 1.4$  Hz, 1H), 7.36 (d,  $J = 8.0$  Hz, 1H), 7.29 (t,  $J = 6.5$  Hz, 1H), 7.24 (dd,  $J = 12.0, 4.2$  Hz, 2H), 7.18 (d,  $J = 7.0$  Hz, 2H), 7.13 (t,  $J = 7.0$  Hz, 1H), 3.35 (s, 3H), 2.72 (d,  $J = 5.5$  Hz, 3H), 2.70 – 2.65 (m, 1H), 2.58 – 2.53 (m, 1H), 2.14 – 2.05 (m, 1H), 2.01 (dd,  $J = 10.0, 4.5$  Hz, 1H), 1.72 – 1.62 (m, 1H).  $^{13}\text{C}$  NMR (126 MHz,  $\text{CDCl}_3$ )  $\delta$  180.98, 157.67, 149.00, 143.37, 140.07, 128.59, 128.10, 127.48, 125.35, 122.38, 50.18, 39.59, 36.39, 32.56, 22.48.  $^{11}\text{B}$  NMR (160 MHz,  $\text{CDCl}_3$ )  $\delta$  -5.74. HRMS (ESI)  $m/z$   $[\text{M}+\text{Na}]^+$  calculated for  $\text{C}_{17}\text{H}_{22}\text{BNO}_2\text{Na}$ : 306.1641, observed: 306.1643.

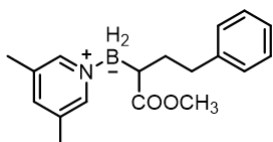

**(3,5-dimethylpyridin-1-ium-1-yl)(1-methoxy-1-oxo-4-phenylbutan-2-yl)boranuide (2c).**  $^1\text{H}$  NMR (500 MHz,  $\text{CDCl}_3$ )  $\delta$  8.09 (s, 2H), 7.55 (s, 1H), 7.23 (t,  $J = 7.5$  Hz, 2H), 7.18 – 7.11 (m, 3H), 3.47 (s, 3H), 2.69 – 2.63 (m, 1H), 2.53 (dt,  $J = 15.0, 7.5$  Hz, 1H), 2.35 (s, 6H), 2.02 – 1.93 (m, 2H), 1.62 (dt,  $J = 16.5, 8.0$  Hz, 1H).  $^{13}\text{C}$  NMR (126 MHz,  $\text{CDCl}_3$ )  $\delta$  181.11, 144.65, 143.35, 141.28, 135.16, 128.61, 128.09, 125.34, 50.31, 41.27, 36.48, 32.41, 18.35.  $^{11}\text{B}$  NMR (160 MHz,  $\text{CDCl}_3$ )  $\delta$  -101.82. HRMS (ESI)  $m/z$   $[\text{M}+\text{Na}]^+$  calculated for  $\text{C}_{18}\text{H}_{24}\text{BNO}_2\text{Na}$ : 320.1798, observed: 320.1801.

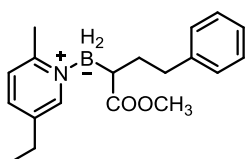

**(5-ethyl-2-methylpyridin-1-ium-1-yl)(1-methoxy-1-oxo-4-phenylbutan-2-yl)boranuide (3c).**  $^1\text{H}$  NMR (500 MHz,  $\text{CDCl}_3$ )  $\delta$  8.35 (d,  $J = 1.0$  Hz, 1H), 7.65 (dd,  $J = 8.0, 2.0$  Hz, 1H), 7.29 –

7.22 (m, 3H), 7.19 (d,  $J = 7.0$  Hz, 2H), 7.14 (t,  $J = 7.0$  Hz, 1H), 3.36 (s, 3H), 2.74 – 2.70 (m, 1H), 2.68 (s, 3H), 2.67 – 2.63 (m, 2H), 2.59 – 2.52 (m, 1H), 2.14 – 2.05 (m, 1H), 2.03 – 1.97 (m, 1H), 1.70 – 1.63 (m, 1H), 1.25 (t,  $J = 7.5$  Hz, 3H).  $^{13}\text{C}$  NMR (126 MHz,  $\text{CDCl}_3$ )  $\delta$  181.03, 154.76, 148.28, 143.40, 139.61, 138.52, 128.59, 128.07, 127.08, 125.30, 50.15, 39.72, 36.38, 32.54, 25.57, 21.95, 14.89.  $^{11}\text{B}$  NMR (160 MHz,  $\text{CDCl}_3$ )  $\delta$  -6.46. HRMS (ESI)  $m/z$   $[\text{M}+\text{Na}]^+$  calculated for  $\text{C}_{19}\text{H}_{26}\text{BNO}_2\text{Na}$ : 334.1954, observed: 334.1951.

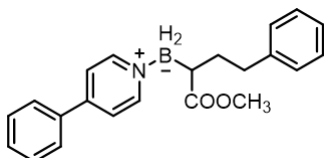

**(1-methoxy-1-oxo-4-phenylbutan-2-yl)(4-phenylpyridin-1-ium-1-yl)boranuide (4c).**  $^1\text{H}$  NMR (500 MHz,  $\text{CDCl}_3$ )  $\delta$  8.45 (d,  $J = 6.5$  Hz, 2H), 7.70 – 7.64 (m, 4H), 7.55 – 7.51 (m, 3H), 7.24 (dd,  $J = 10.0, 4.8$  Hz, 2H), 7.17 (d,  $J = 7.0$  Hz, 2H), 7.14 (d,  $J = 7.0$  Hz, 1H), 3.51 (s, 3H), 2.71 – 2.64 (m, 1H), 2.57 (m, 1H), 2.06 (dd,  $J = 9.5, 5.0$  Hz, 1H), 2.01 – 1.91 (m, 1H), 1.72 – 1.64 (m, 1H).  $^{13}\text{C}$  NMR (126 MHz,  $\text{CDCl}_3$ )  $\delta$  181.17, 152.28, 147.50, 143.33, 135.52, 130.84, 129.61, 128.64, 128.15, 127.28, 125.41, 122.73, 50.48, 41.11, 36.56, 32.52.  $^{11}\text{B}$  NMR (160 MHz,  $\text{CDCl}_3$ )  $\delta$  -4.53. HRMS (ESI)  $m/z$   $[\text{M}+\text{Na}]^+$  calculated for  $\text{C}_{22}\text{H}_{24}\text{BNO}_2\text{Na}$ : 368.1798, observed: 368.1800.

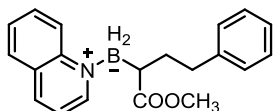

**(1-methoxy-1-oxo-4-phenylbutan-2-yl)(quinolin-1-ium-1-yl)boranuide (5c).**  $^1\text{H}$  NMR (500 MHz,  $\text{CDCl}_3$ )  $\delta$  8.99 (d,  $J = 5.0$  Hz, 1H), 8.82 (d,  $J = 9.0$  Hz, 1H), 8.46 (d,  $J = 8.0$  Hz, 1H), 7.95 (d,  $J = 8.0$  Hz, 1H), 7.88 (t,  $J = 8.0$  Hz, 1H), 7.71 (t,  $J = 7.5$  Hz, 1H), 7.54 (dd,  $J = 8.0, 5.5$  Hz, 1H), 7.23 (t,  $J = 7.5$  Hz, 2H), 7.18 (d,  $J = 7.0$  Hz, 2H), 7.13 (t,  $J = 7.0$  Hz, 1H), 3.27 (s, 3H), 2.77 – 2.67 (m, 1H), 2.60 – 2.51 (m, 1H), 2.20 – 2.10 (m, 2H), 1.77 – 1.69 (m, 1H).  $^{13}\text{C}$  NMR (126 MHz,  $\text{CDCl}_3$ )  $\delta$  181.02, 150.68, 143.39, 142.65, 141.91, 132.40, 129.29, 128.73, 128.59, 128.34, 128.09, 125.33, 124.45, 120.47, 50.20, 40.29, 36.41, 32.67.  $^{11}\text{B}$  NMR (160 MHz,  $\text{CDCl}_3$ )  $\delta$  -5.83. HRMS (ESI)  $m/z$   $[\text{M}+\text{Na}]^+$  calculated for  $\text{C}_{20}\text{H}_{22}\text{BNO}_2\text{Na}$ : 342.1641, observed: 342.1645.

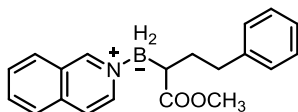

**(isoquinolin-2-ium-2-yl)(1-methoxy-1-oxo-4-phenylbutan-2-yl)boranuide (6c).**  $^1\text{H}$  NMR (500 MHz,  $\text{CDCl}_3$ )  $\delta$  9.15 (s, 1H), 8.28 (d,  $J = 6.5$  Hz, 1H), 8.07 (d,  $J = 8.5$  Hz, 1H), 7.97 – 7.88 (m, 2H), 7.84 (d,  $J = 6.5$  Hz, 1H), 7.77 (t,  $J = 7.0$  Hz, 1H), 7.23 (t,  $J = 7.5$  Hz, 2H), 7.15 (dd,  $J = 15.0, 7.2$  Hz, 3H), 3.44 (s, 3H), 2.71 – 2.65 (m, 1H), 2.57 (m, 1H), 2.11 (dd,  $J = 9.5, 5.0$  Hz, 1H), 2.07 – 1.93 (m, 1H), 1.70 (m, 1H).  $^{13}\text{C}$  NMR (126 MHz,  $\text{CDCl}_3$ )  $\delta$  181.13, 150.68, 143.33, 139.34, 136.27, 133.79, 129.41, 128.98, 128.62, 128.09, 127.88, 126.64, 125.35, 122.91, 50.37, 41.26, 36.52, 32.49.  $^{11}\text{B}$  NMR (160 MHz,  $\text{CDCl}_3$ )  $\delta$  -3.87. HRMS (ESI)  $m/z$   $[\text{M}+\text{Na}]^+$  calculated for  $\text{C}_{20}\text{H}_{22}\text{BNO}_2\text{Na}$ : 342.1641, observed: 342.1645.

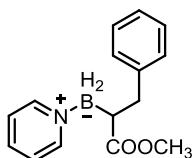

**(1-methoxy-1-oxo-3-phenylpropan-2-yl)(pyridin-1-ium-1-yl)boranuide (1d).**  $^1\text{H}$  NMR (500 MHz,  $\text{CDCl}_3$ )  $\delta$  8.43 (d,  $J = 5.5$  Hz, 2H), 7.91 (t,  $J = 7.5$  Hz, 1H), 7.49 – 7.43 (m, 2H), 7.14 – 7.08 (m, 4H), 7.05 – 7.00 (m, 1H), 3.30 (s, 3H), 2.87 (dd,  $J = 14.5, 10.5$  Hz, 1H), 2.62 (dd,  $J = 14.5, 4.0$  Hz, 1H), 2.27 (dd,  $J = 10.0, 5.0$  Hz, 1H).  $^{13}\text{C}$  NMR (126 MHz,  $\text{CDCl}_3$ )  $\delta$  179.40, 146.36, 142.85, 139.06, 127.44, 126.97, 124.29, 124.21, 49.36, 42.30, 35.26.  $^{11}\text{B}$  NMR (160 MHz,  $\text{CDCl}_3$ )  $\delta$  -3.57. HRMS (ESI)  $m/z$   $[\text{M}+\text{Na}]^+$  calculated for  $\text{C}_{15}\text{H}_{18}\text{BNO}_2\text{Na}$ : 278.1328, observed: 278.1323.

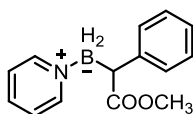

**(2-methoxy-2-oxo-1-phenylethyl)(pyridin-1-ium-1-yl)boranuide (2d).**  $^1\text{H}$  NMR (500 MHz,  $\text{CDCl}_3$ )  $\delta$  8.19 (d,  $J = 5.5$  Hz, 2H), 7.90 (t,  $J = 7.5$  Hz, 1H), 7.42 – 7.35 (m, 2H), 7.14 (dt,  $J = 13.0, 7.5$  Hz, 4H), 7.05 – 7.01 (m, 1H), 3.58 (s, 3H), 3.38 (s, 1H).  $^{13}\text{C}$  NMR (126 MHz,  $\text{CDCl}_3$ )  $\delta$  178.17, 147.34, 142.58, 140.21, 127.90, 127.75, 125.02, 124.45, 50.90, 49.06.  $^{11}\text{B}$  NMR (160 MHz,  $\text{CDCl}_3$ )  $\delta$  -2.83. HRMS (ESI)  $m/z$   $[\text{M}+\text{Na}]^+$  calculated for  $\text{C}_{14}\text{H}_{16}\text{BNO}_2\text{Na}$ : 264.1172, observed: 264.1176.

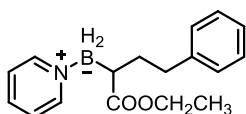

**(1-ethoxy-1-oxo-4-phenylbutan-2-yl)(pyridin-1-ium-1-yl)boranuide (3d).**  $^1\text{H}$  NMR (500 MHz,  $\text{CDCl}_3$ )  $\delta$  8.49 (d,  $J = 5.0$  Hz, 2H), 7.98 (m, 1H), 7.53 (dd,  $J = 7.5, 6.5$  Hz, 2H), 7.25 (dd,  $J = 12.5, 5.0$  Hz, 2H), 7.19 – 7.12 (m, 3H), 3.95 (m, 2H), 2.70 – 2.63 (m, 1H), 2.56 (m, 1H), 2.02 – 1.96 (m, 1H), 1.96 – 1.87 (m, 1H), 1.68 – 1.61 (m, 1H), 1.09 (t,  $J = 7.0$  Hz, 3H).  $^{13}\text{C}$  NMR (126 MHz,  $\text{CDCl}_3$ )  $\delta$  180.69, 147.46, 143.38, 139.92, 128.61, 128.11, 125.36, 125.22, 58.73, 41.05, 36.46, 32.44, 14.55.  $^{11}\text{B}$  NMR (160 MHz,  $\text{CDCl}_3$ )  $\delta$  -4.53. HRMS (ESI)  $m/z$   $[\text{M}+\text{Na}]^+$  calculated for  $\text{C}_{17}\text{H}_{22}\text{BNO}_2\text{Na}$ : 306.1641, observed: 306.1644.

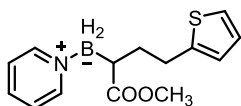

**[1-methoxy-1-oxo-4-(thiophen-2-yl)butan-2-yl](pyridin-1-ium-1-yl)boranuide (4d).**  $^1\text{H}$  NMR (500 MHz,  $\text{CDCl}_3$ )  $\delta$  8.46 (d,  $J = 5.0$  Hz, 2H), 8.02 – 7.93 (m, 1H), 7.53 (dd,  $J = 10.0, 4.0$  Hz, 2H), 7.05 (d,  $J = 5.0$  Hz, 1H), 6.87 (dd,  $J = 5.0, 3.5$  Hz, 1H), 6.75 (d,  $J = 3.0$  Hz, 1H), 3.45 (s, 3H), 2.87 (m, 1H), 2.81 – 2.74 (m, 1H), 2.06 – 1.94 (m, 2H), 1.74 – 1.65 (m, 1H).  $^{13}\text{C}$  NMR (126 MHz,  $\text{CD}_3\text{OD}$ )  $\delta$  176.86, 143.42, 142.25, 136.19, 122.67, 121.41, 120.03, 118.65, 46.48, 36.83, 28.62, 26.27.  $^{11}\text{B}$  NMR (160 MHz,  $\text{CD}_3\text{OD}$ )  $\delta$  -7.84. HRMS (ESI)  $m/z$   $[\text{M}+\text{Na}]^+$  calculated for  $\text{C}_{14}\text{H}_{18}\text{BNO}_2\text{SNa}$ : 298.1049, observed: 298.1054.

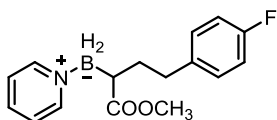

**[4-(4-fluorophenyl)-1-methoxy-1-oxobutan-2-yl](pyridin-1-ium-1-yl)boranuide (5d).**  $^1\text{H}$  NMR (500 MHz,  $\text{CDCl}_3$ )  $\delta$  8.45 (d,  $J = 5.5$  Hz, 2H), 7.97 (d,  $J = 7.5$  Hz, 1H), 7.56 – 7.50 (m, 2H), 7.09 (dd,  $J = 8.5, 5.5$  Hz, 2H), 6.90 (t,  $J = 8.5$  Hz, 2H), 3.44 (s, 3H), 2.64 – 2.58 (m, 1H), 2.54 – 2.47 (m, 1H), 1.97 (dd,  $J = 9.5, 5.0$  Hz, 1H), 1.93 – 1.85 (m, 1H), 1.65 – 1.56 (m, 1H).  $^{13}\text{C}$  NMR (126 MHz,  $\text{CDCl}_3$ )  $\delta$  180.93, 161.04 (d,  $J = 240.5$  Hz), 147.34, 140.09, 138.82, 129.85 (d,  $J = 7.9$  Hz), 125.32, 114.75 (d,  $J = 20$  Hz), 50.38, 40.90, 35.56, 32.49.  $^{11}\text{B}$  NMR (160 MHz,  $\text{CDCl}_3$ )  $\delta$  -3.77. HRMS (ESI)  $m/z$   $[\text{M}+\text{Na}]^+$  calculated for  $\text{C}_{16}\text{H}_{19}\text{BFNO}_2\text{Na}$ : 310.1391, observed: 310.1392.

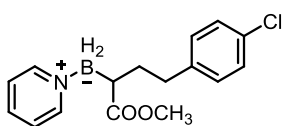

**[4-(4-chlorophenyl)-1-methoxy-1-oxobutan-2-yl](pyridin-1-ium-1-yl)boranuide (6d).**  $^1\text{H}$  NMR (500 MHz,  $\text{CDCl}_3$ )  $\delta$  8.46 (d,  $J = 5.5$  Hz, 2H), 7.99 (t,  $J = 7.5$  Hz, 1H), 7.54 (t,  $J = 7.0$  Hz, 2H), 7.19 (d,  $J = 8.0$  Hz, 2H), 7.08 (d,  $J = 8.0$  Hz, 2H), 3.45 (s, 3H), 2.65 – 2.58 (m, 1H), 2.54 – 2.47 (m, 1H), 2.00 – 1.94 (m, 1H), 1.93 – 1.84 (m, 1H), 1.65 – 1.57 (m, 1H).  $^{13}\text{C}$  NMR (126 MHz,  $\text{CDCl}_3$ )  $\delta$  180.91, 147.36, 141.67, 140.07, 131.00, 129.96, 128.16, 125.30, 50.42, 40.91, 35.71, 32.26.  $^{11}\text{B}$  NMR (160 MHz,  $\text{CDCl}_3$ )  $\delta$  -3.86. HRMS (ESI)  $m/z$   $[\text{M}+\text{Na}]^+$  calculated for  $\text{C}_{16}\text{H}_{19}\text{BClNO}_2\text{Na}$ : 326.1095, observed: 326.1100.

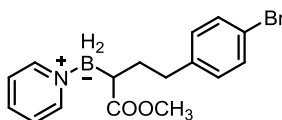

**[4-(4-bromophenyl)-1-methoxy-1-oxobutan-2-yl](pyridin-1-ium-1-yl)boranuide (7d).**  $^1\text{H}$  NMR (500 MHz,  $\text{CDCl}_3$ )  $\delta$  8.45 (d,  $J = 5.5$  Hz, 2H), 7.98 (t,  $J = 7.5$  Hz, 1H), 7.57 – 7.51 (m, 2H), 7.34 (d,  $J = 8.5$  Hz, 2H), 7.03 (d,  $J = 8.0$  Hz, 2H), 3.45 (s, 3H), 2.64 – 2.57 (m, 1H), 2.54 – 2.46 (m, 1H), 1.97 (dd,  $J = 9.5, 5.0$  Hz, 1H), 1.94 – 1.85 (m, 1H), 1.66 – 1.55 (m, 1H).  $^{13}\text{C}$  NMR (126 MHz,  $\text{CDCl}_3$ )  $\delta$  180.87, 147.30, 142.22, 140.14, 131.11, 130.42, 125.35, 119.04, 50.40, 40.88, 35.75, 32.22.  $^{11}\text{B}$  NMR (160 MHz,  $\text{CDCl}_3$ )  $\delta$  -3.89. HRMS (ESI)  $m/z$   $[\text{M}+\text{Na}]^+$  calculated for  $\text{C}_{16}\text{H}_{19}\text{BBrNO}_2\text{Na}$ : 370.0590, observed: 370.0592.

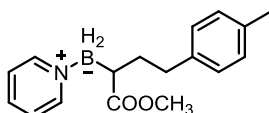

**[1-methoxy-4-(methylphenyl)-1-oxobutan-2-yl](pyridin-1-ium-1-yl)boranuide (8d).**  $^1\text{H}$  NMR (500 MHz,  $\text{CDCl}_3$ )  $\delta$  8.46 (d,  $J = 5.5$  Hz, 2H), 7.97 (t,  $J = 7.5$  Hz, 1H), 7.56 – 7.49 (m, 2H), 7.06 (s, 4H), 3.48 (s, 3H), 2.66 – 2.59 (m, 1H), 2.51 (m, 1H), 2.30 (s, 3H), 2.02 (dd,  $J = 9.5, 5.0$  Hz, 1H), 1.90 (m, 1H), 1.67 – 1.58 (m, 1H).  $^{13}\text{C}$  NMR (126 MHz,  $\text{CDCl}_3$ )  $\delta$  181.09, 147.36,

140.18, 140.08, 134.74, 128.84, 128.48, 125.31, 50.40, 41.11, 36.04, 32.59, 21.03.  $^{11}\text{B}$  NMR (160 MHz,  $\text{CDCl}_3$ )  $\delta$  -3.78. HRMS (ESI)  $m/z$   $[\text{M}+\text{Na}]^+$  calculated for  $\text{C}_{17}\text{H}_{22}\text{BNO}_2\text{Na}$ : 306.1641, observed: 306.1643.

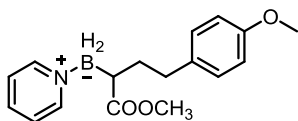

**[1-methoxy-4-(methoxyphenyl)-1-oxobutan-2-yl](pyridin-1-ium-1-yl)boranuide (9d).**  $^1\text{H}$  NMR (500 MHz,  $\text{CDCl}_3$ )  $\delta$  8.46 (d,  $J = 5.5$  Hz, 2H), 7.97 (t,  $J = 7.5$  Hz, 1H), 7.57 – 7.49 (m, 2H), 7.07 (d,  $J = 8.5$  Hz, 2H), 6.79 (d,  $J = 8.5$  Hz, 2H), 3.76 (s, 3H), 3.47 (s, 3H), 2.63 – 2.55 (m, 1H), 2.51 – 2.44 (m, 1H), 2.00 (dd,  $J = 9.5, 4.9$  Hz, 1H), 1.88 (m, 1H), 1.64 – 1.56 (m, 1H).  $^{13}\text{C}$  NMR (126 MHz,  $\text{CDCl}_3$ )  $\delta$  181.09, 157.46, 147.38, 140.02, 135.38, 129.44, 125.27, 113.54, 55.25, 50.41, 41.02, 35.51, 32.62.  $^{11}\text{B}$  NMR (160 MHz,  $\text{CDCl}_3$ )  $\delta$  -3.89. HRMS (ESI)  $m/z$   $[\text{M}+\text{Na}]^+$  calculated for  $\text{C}_{17}\text{H}_{22}\text{BNO}_3\text{Na}$ : 322.1590, observed: 322.1595.

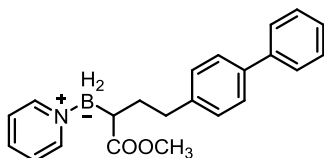

**[1-methoxy-1-oxo-4-(4-phenylphenyl)-butan-2-yl](pyridin-1-ium-1-yl)boranuide (10d).**  $^1\text{H}$  NMR (500 MHz,  $\text{CDCl}_3$ )  $\delta$  8.45 (d,  $J = 5.5$  Hz, 2H), 7.93 (t,  $J = 7.5$  Hz, 1H), 7.56 (d,  $J = 7.5$  Hz, 2H), 7.48 (t,  $J = 8.5$  Hz, 4H), 7.40 (t,  $J = 7.5$  Hz, 2H), 7.30 (t,  $J = 7.5$  Hz, 1H), 7.24 (d,  $J = 8.0$  Hz, 2H), 3.47 (s, 3H), 2.74 – 2.67 (m, 1H), 2.63 – 2.56 (m, 1H), 2.04 (d,  $J = 10.0$  Hz, 1H), 1.97 (m, 1H), 1.68 (m, 1H).  $^{13}\text{C}$  NMR (126 MHz,  $\text{CDCl}_3$ )  $\delta$  181.03, 147.37, 142.49, 141.27, 140.08, 138.32, 129.07, 128.74, 126.99, 126.94, 126.89, 125.32, 50.44, 41.11, 36.11, 32.43.  $^{11}\text{B}$  NMR (160 MHz,  $\text{CDCl}_3$ )  $\delta$  -3.86. HRMS (ESI)  $m/z$   $[\text{M}+\text{Na}]^+$  calculated for  $\text{C}_{22}\text{H}_{24}\text{BNO}_2\text{Na}$ : 368.1798, observed: 368.1789.

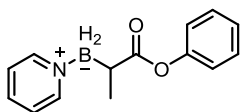

**[1-(benzyloxy)-1-oxopropan-2-yl](pyridin-1-ium-1-yl)boranuide (11d).**  $^1\text{H}$  NMR NMR (500 MHz,  $\text{CDCl}_3$ )  $\delta$  8.29 (d,  $J = 6.0$  Hz, 2H), 7.84 (t,  $J = 7.5$  Hz, 1H), 7.39 – 7.27 (m, 7H), 5.01 (d,  $J = 12.5$  Hz, 1H), 4.89 (d,  $J = 12.5$  Hz, 1H), 2.73 (d,  $J = 101.5$  Hz, 2H), 2.08 (dd,  $J = 10.0, 6.0$  Hz, 1H), 1.06 (d,  $J = 6.8$  Hz, 3H). The  $^1\text{H}$  NMR data were consistent with those previously reported.<sup>7</sup>

$^1\text{H}$  NMR (500 MHz,  $\text{CDCl}_3$ ),  $^{13}\text{C}$  NMR (126 MHz,  $\text{CDCl}_3$ ) &  $^{11}\text{B}$  NMR (160 MHz,  $\text{CDCl}_3$ )  
for c.

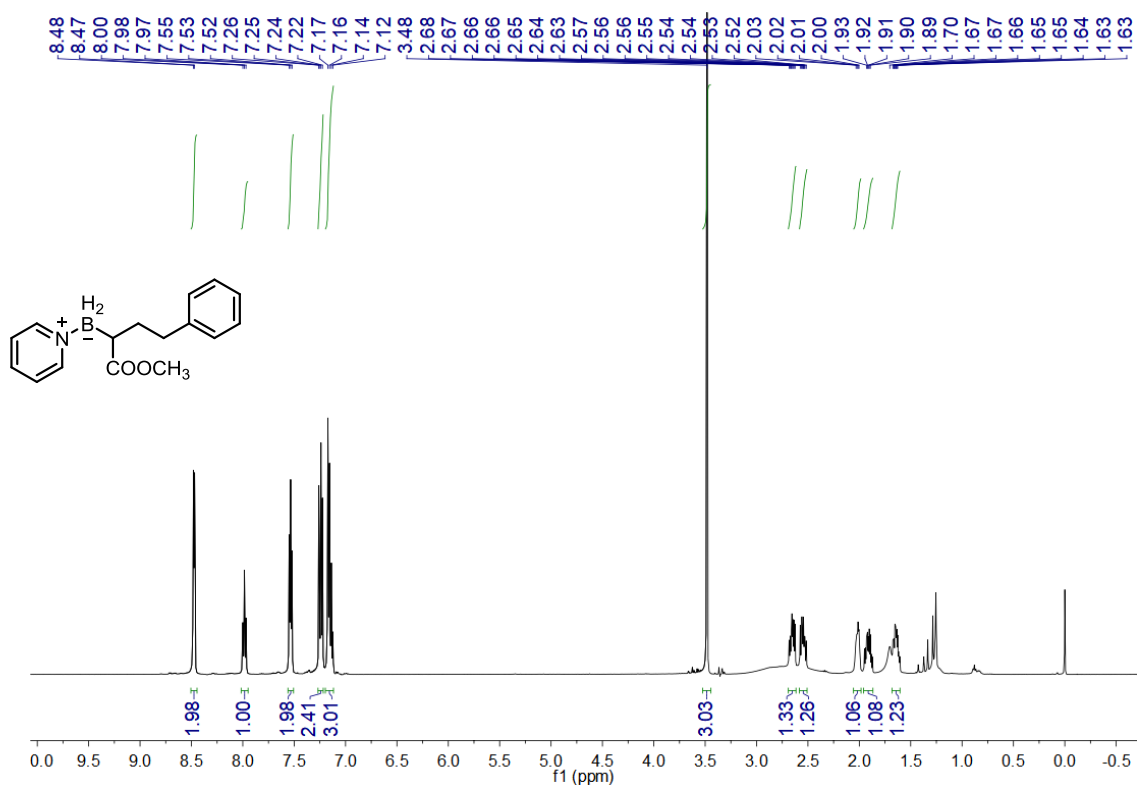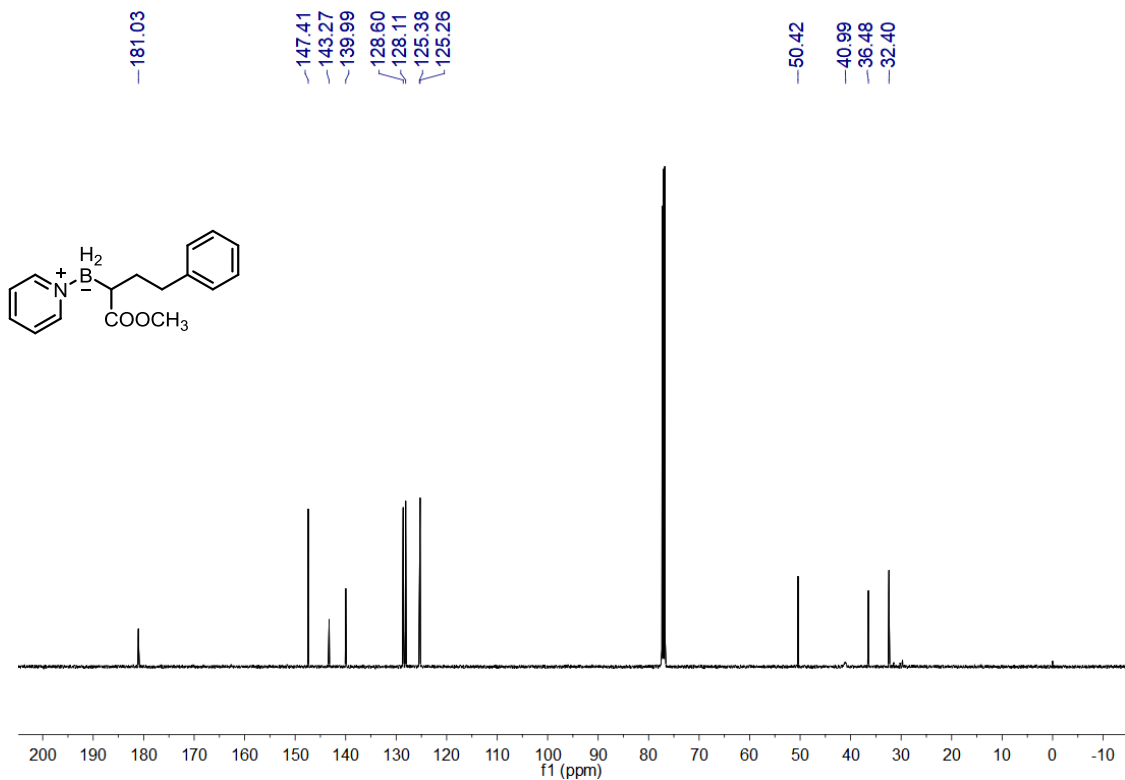

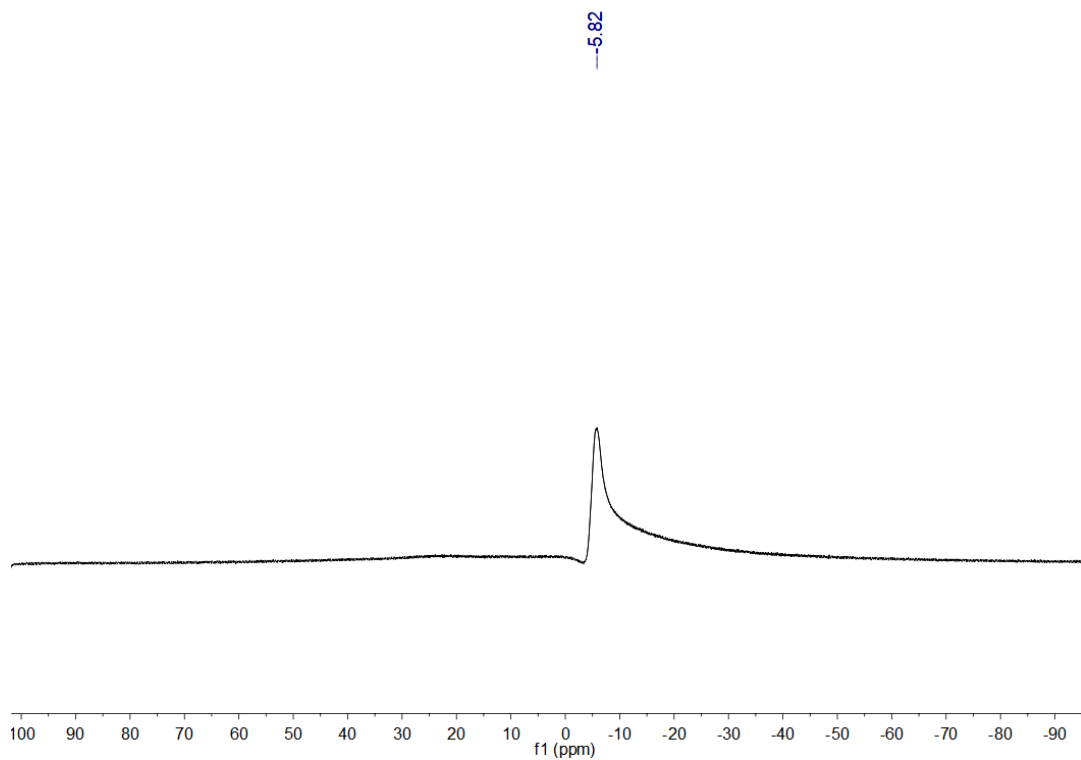

<sup>1</sup>H NMR (500 MHz, CDCl<sub>3</sub>), <sup>13</sup>C NMR (126 MHz, CDCl<sub>3</sub>) & <sup>11</sup>B NMR (160 MHz, CDCl<sub>3</sub>)  
for **1c**

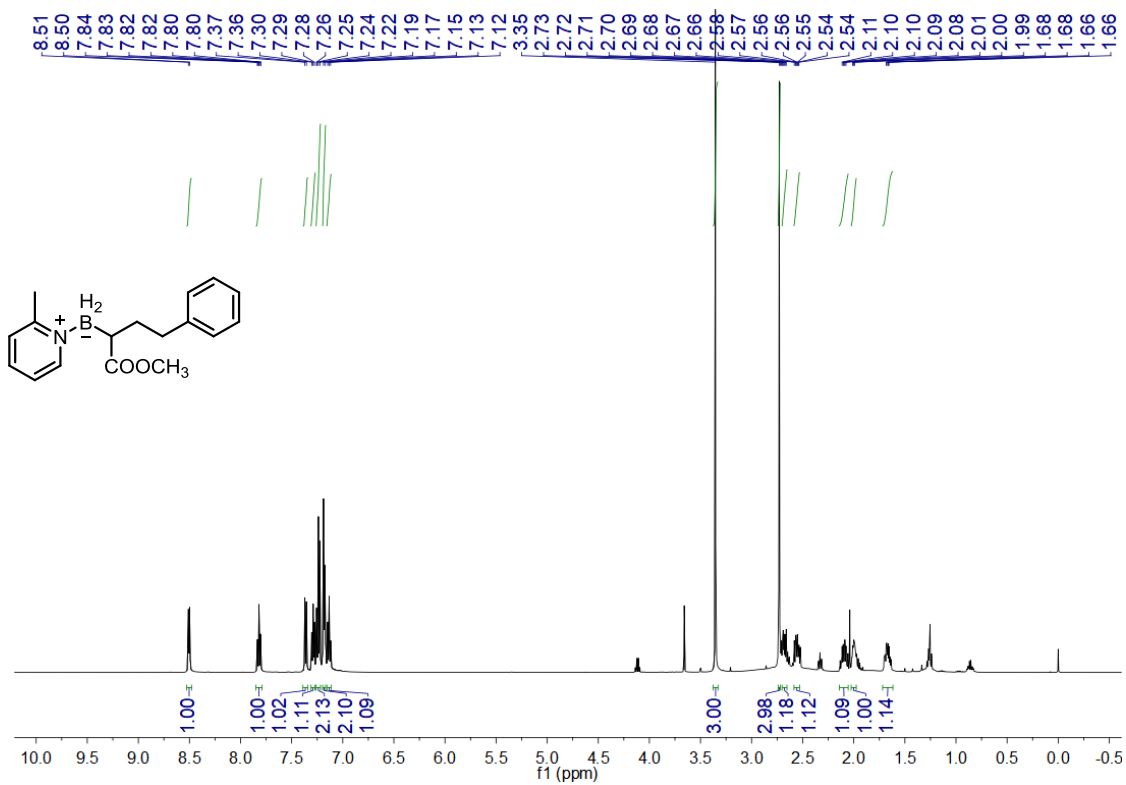

-180.98  
-157.67  
-149.00  
-143.37  
-140.07  
-128.59  
-128.10  
-127.48  
-125.35  
-122.38

-50.18  
-39.59  
-36.39  
-32.56  
-22.48

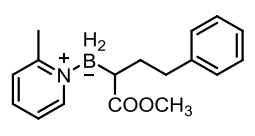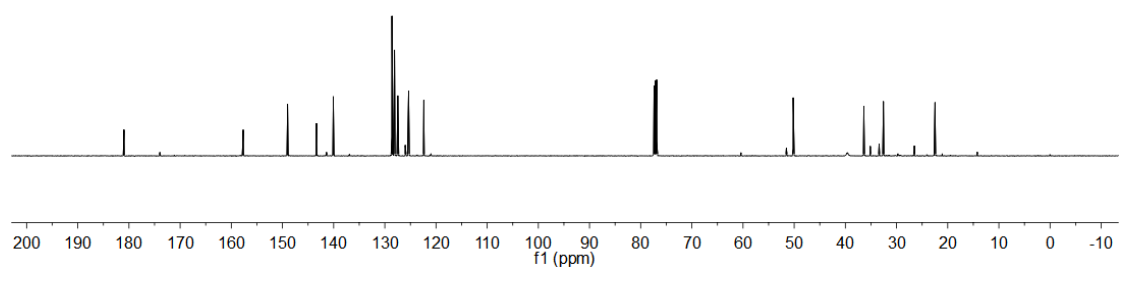

-5.74

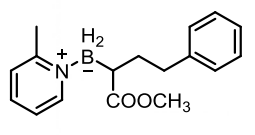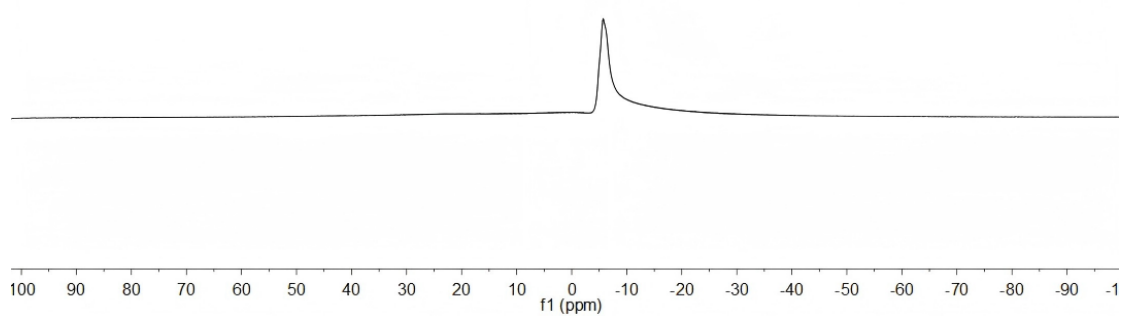

$^1\text{H}$  NMR (500 MHz,  $\text{CDCl}_3$ ),  $^{13}\text{C}$  NMR (126 MHz,  $\text{CDCl}_3$ ) &  $^{11}\text{B}$  NMR (160 MHz,  $\text{CDCl}_3$ )  
for **2c**

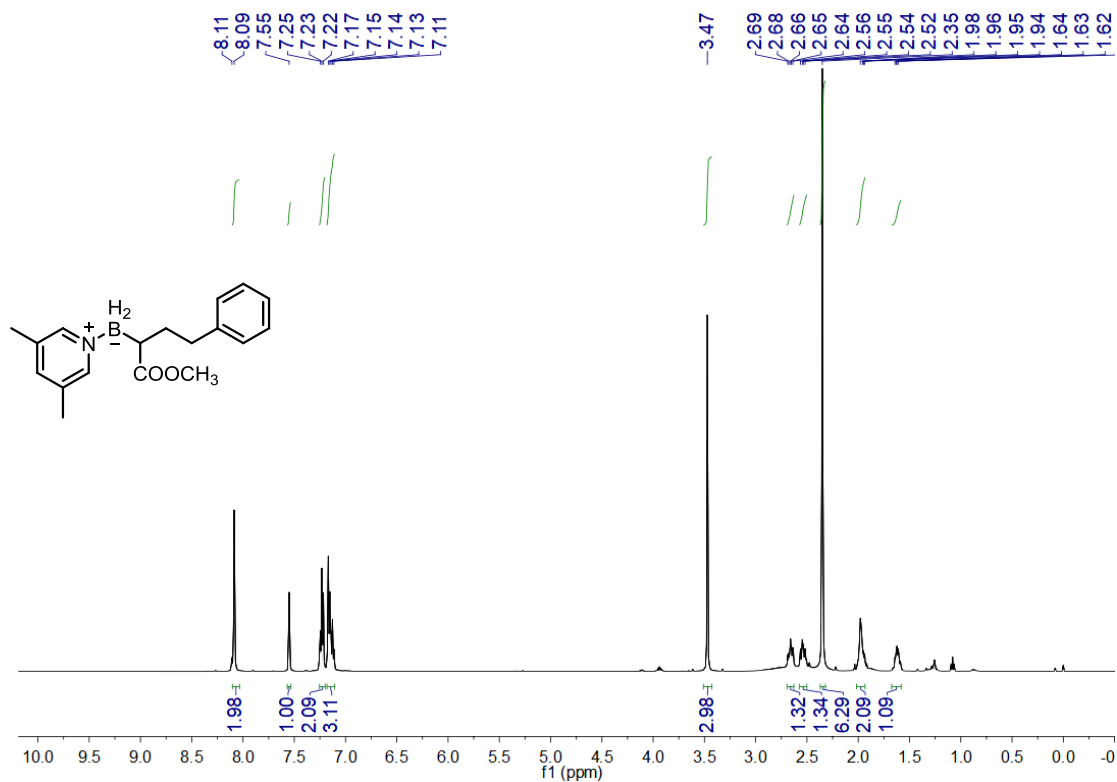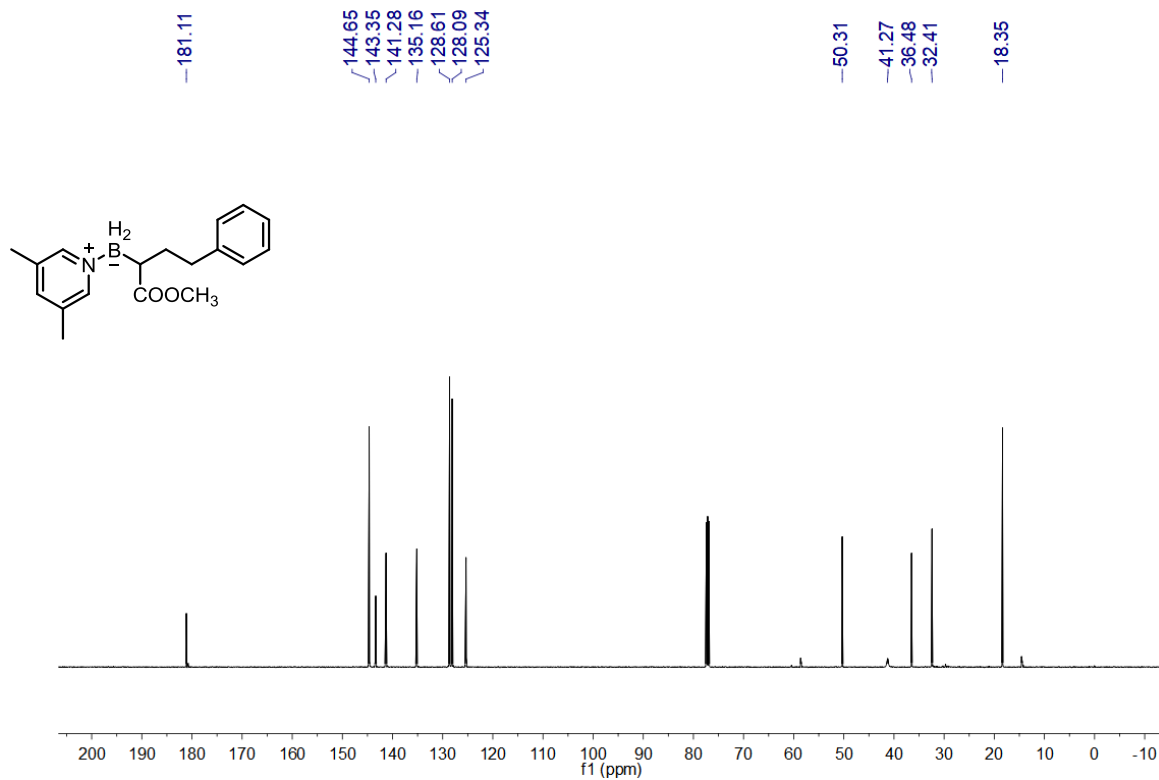

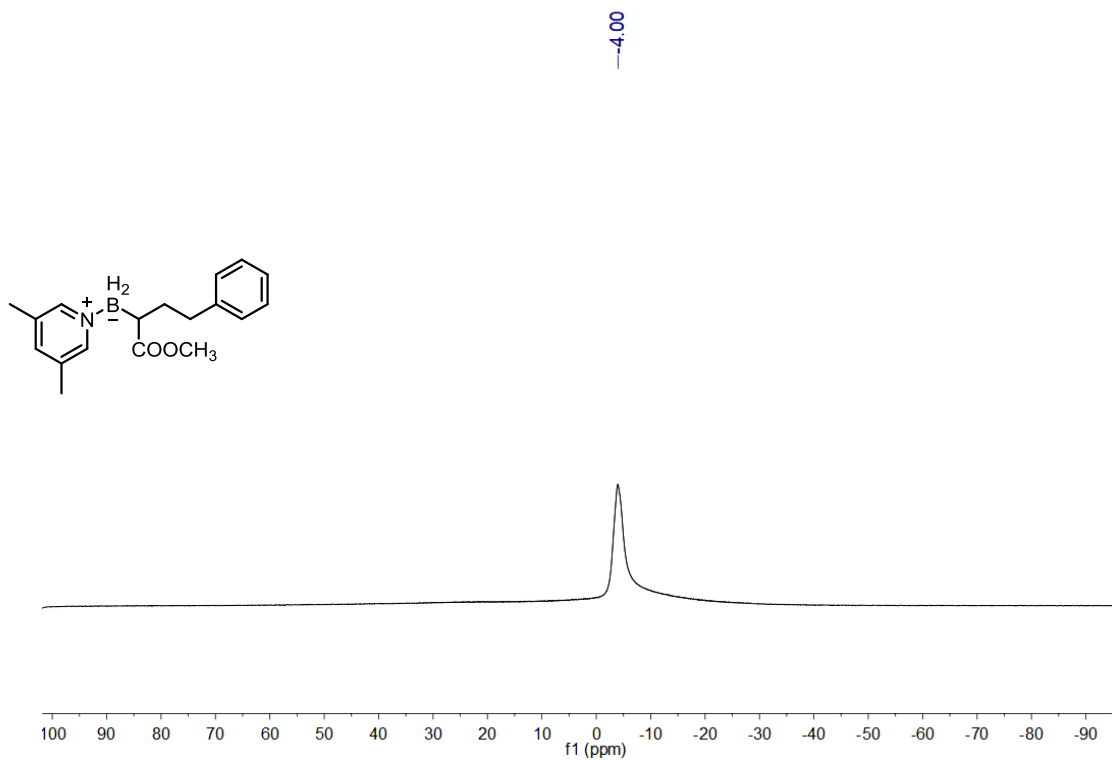

<sup>1</sup>H NMR (500 MHz, CDCl<sub>3</sub>), <sup>13</sup>C NMR (126 MHz, CDCl<sub>3</sub>) & <sup>11</sup>B NMR (160 MHz, CDCl<sub>3</sub>)  
for **3c**

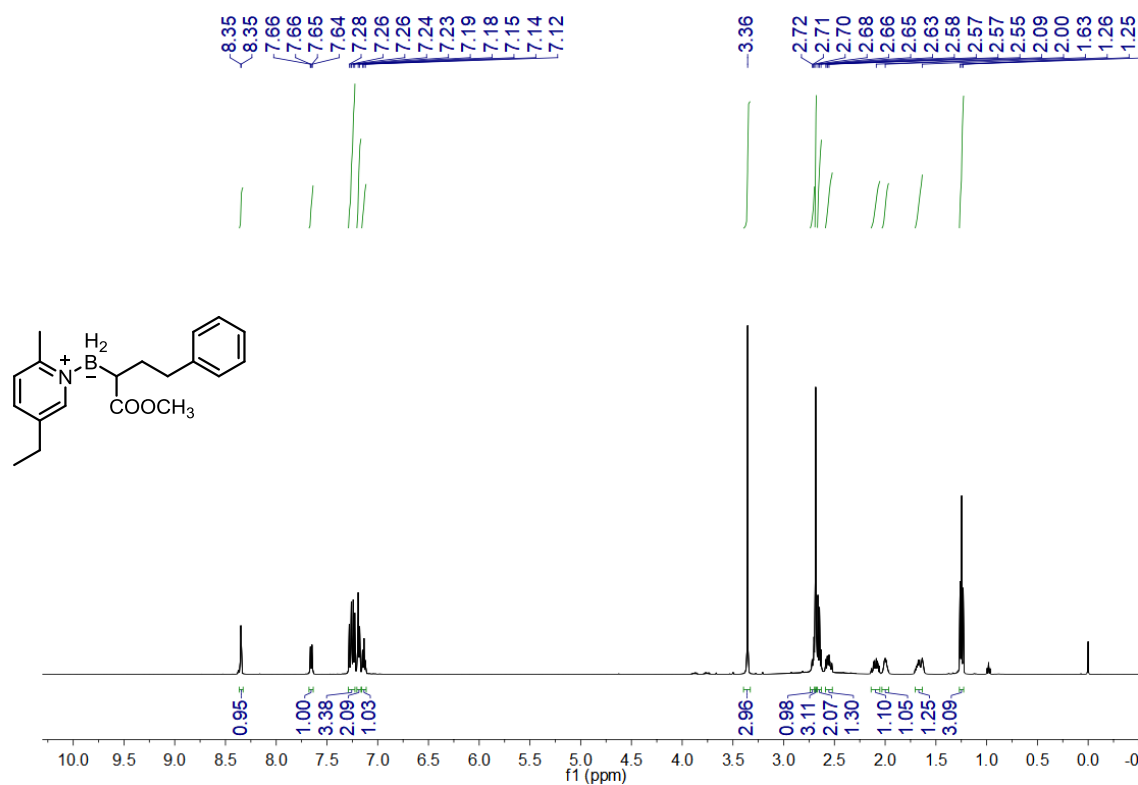

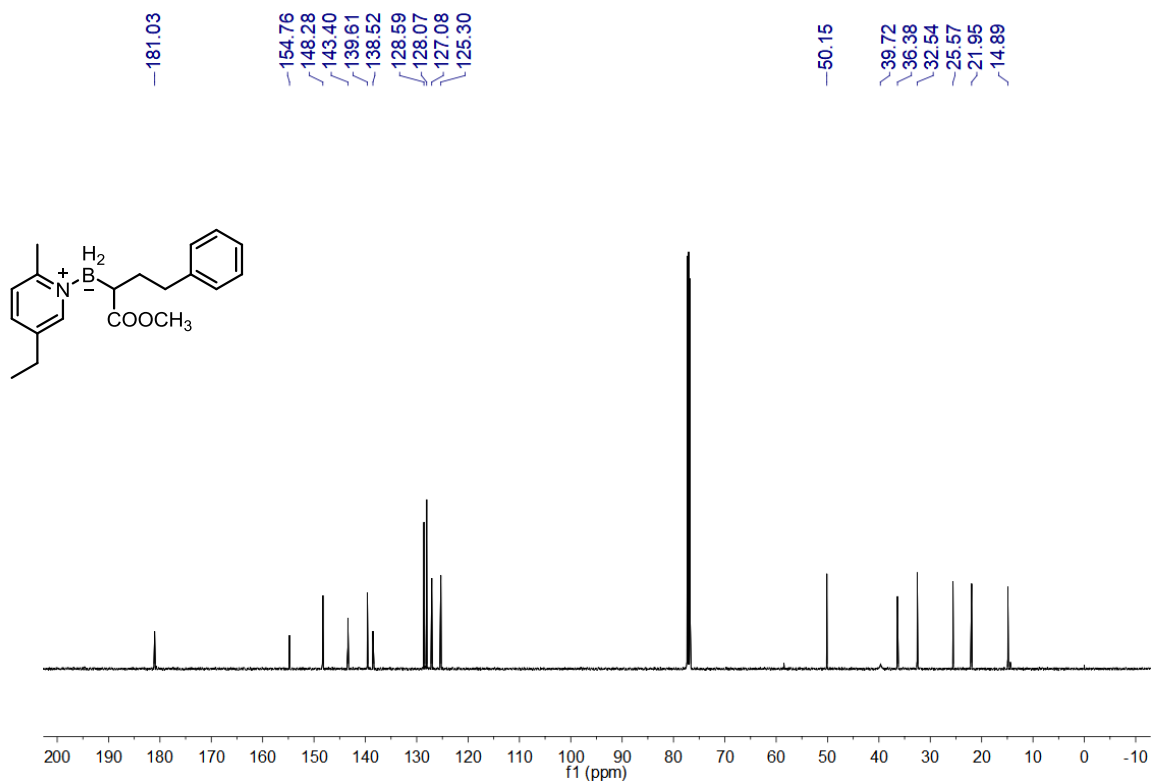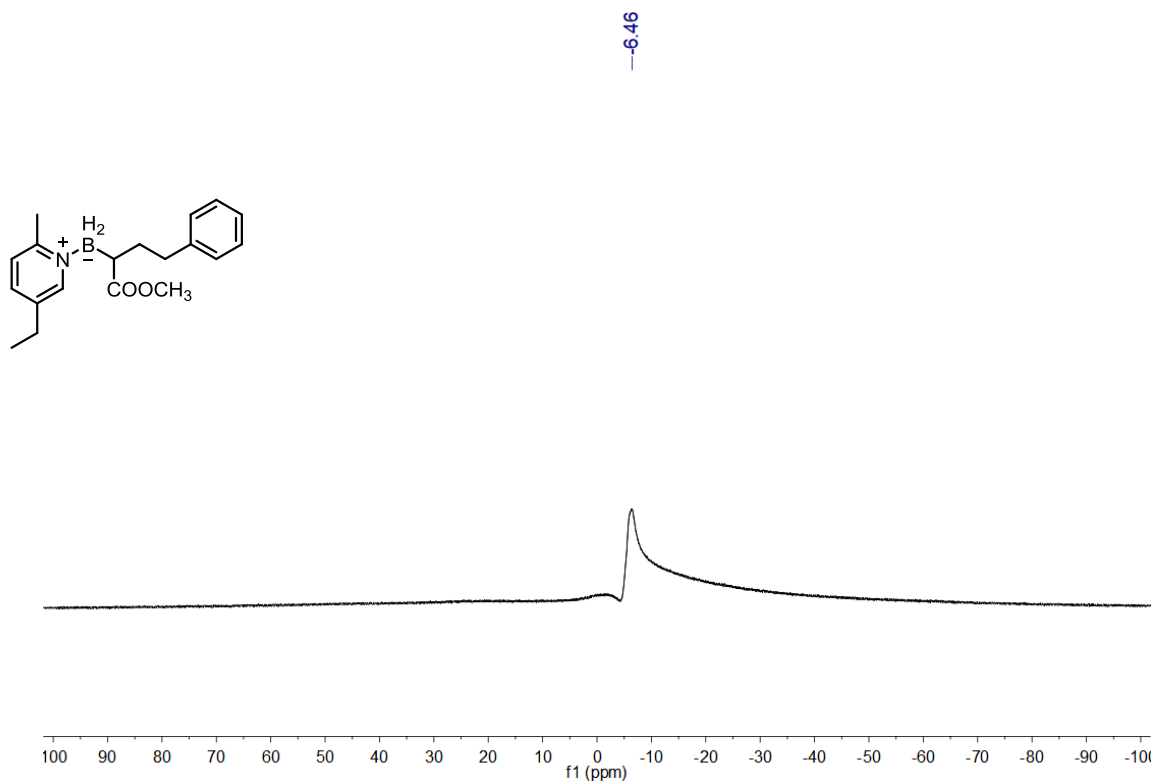

$^1\text{H}$  NMR (500 MHz,  $\text{CDCl}_3$ ),  $^{13}\text{C}$  NMR (126 MHz,  $\text{CDCl}_3$ ) &  $^{11}\text{B}$  NMR (160 MHz,  $\text{CDCl}_3$ )  
for **4c**

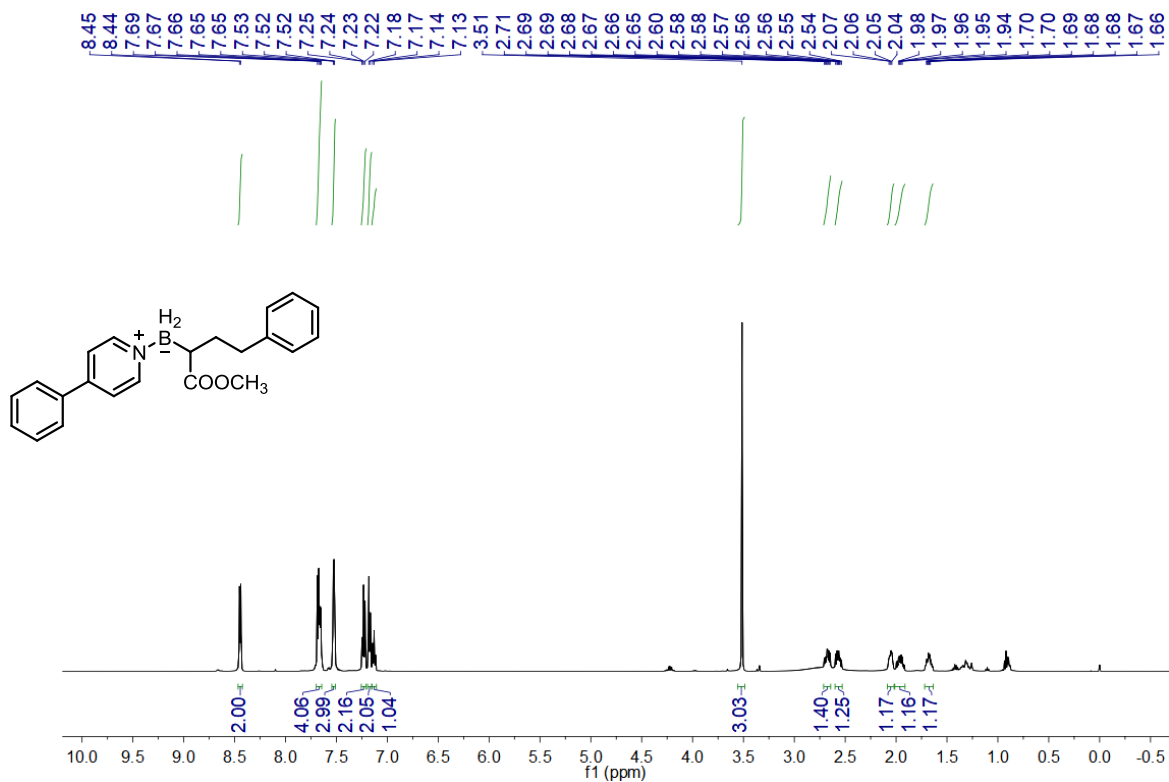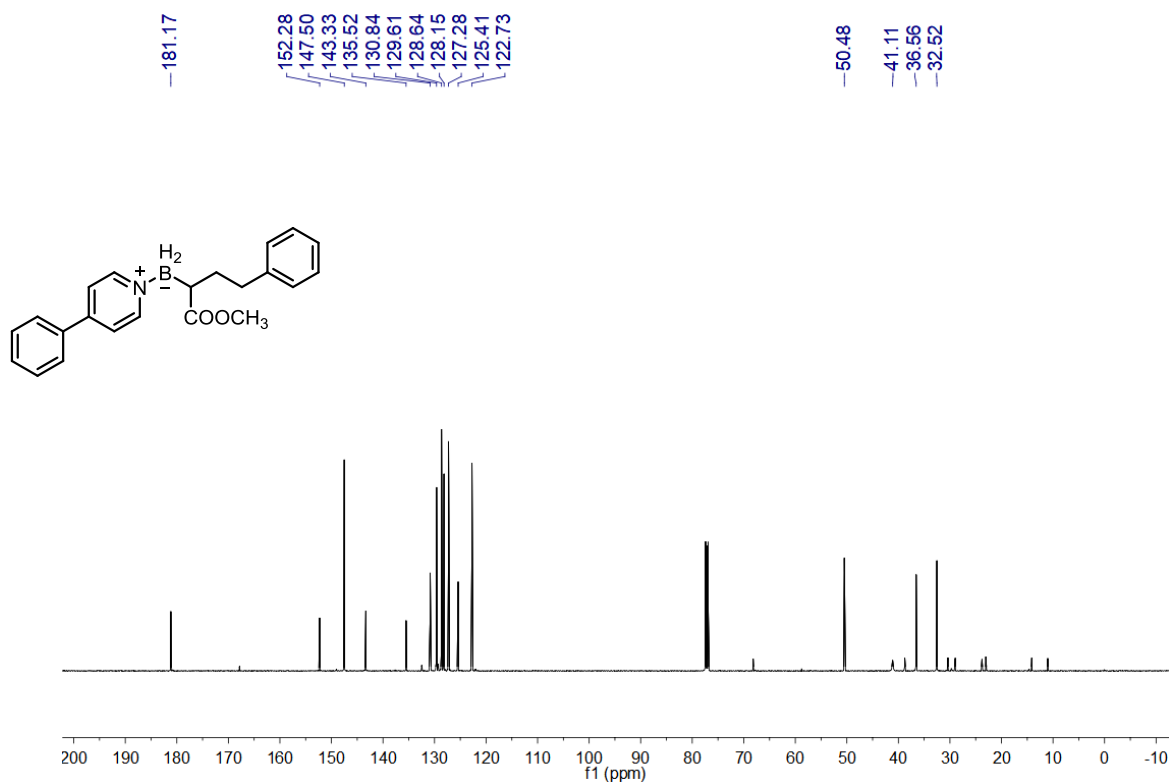

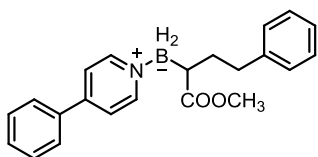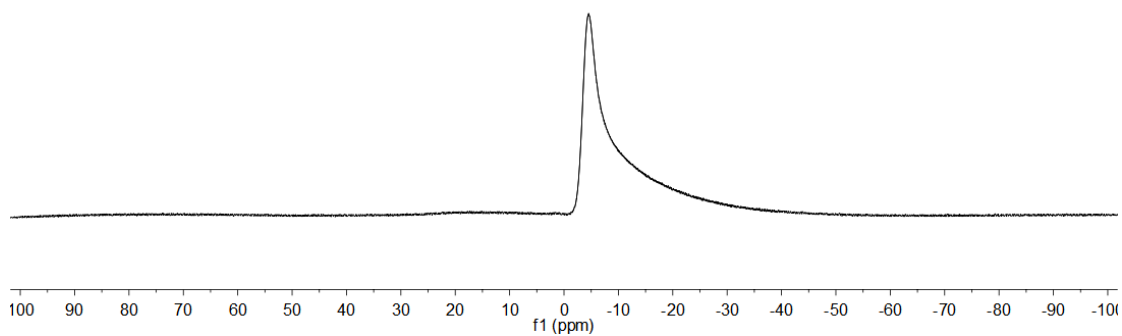

<sup>1</sup>H NMR (500 MHz, CDCl<sub>3</sub>), <sup>13</sup>C NMR (126 MHz, CDCl<sub>3</sub>) & <sup>11</sup>B NMR (160 MHz, CDCl<sub>3</sub>)  
for **5c**

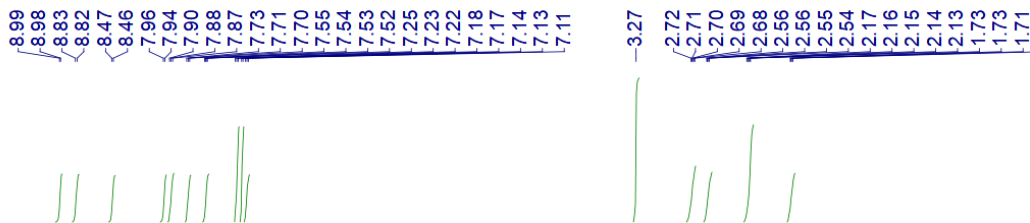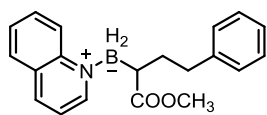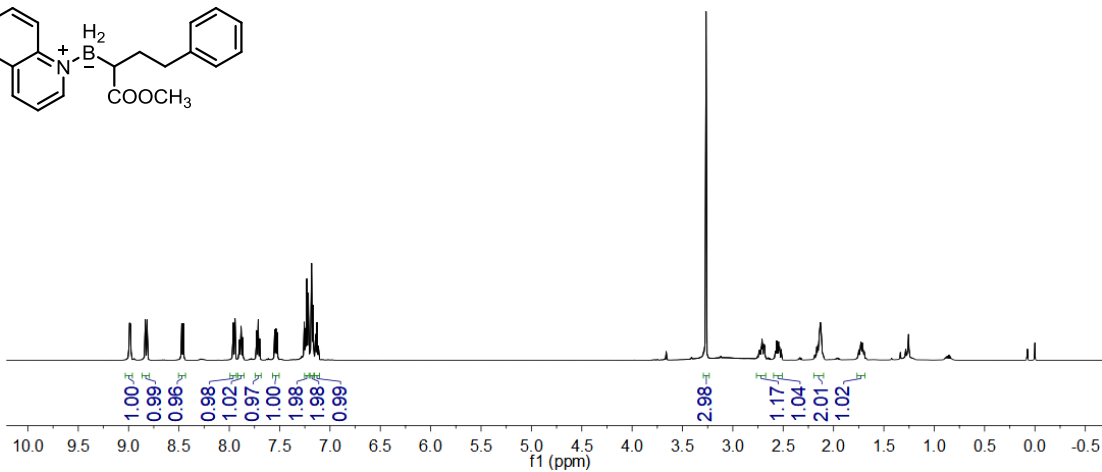

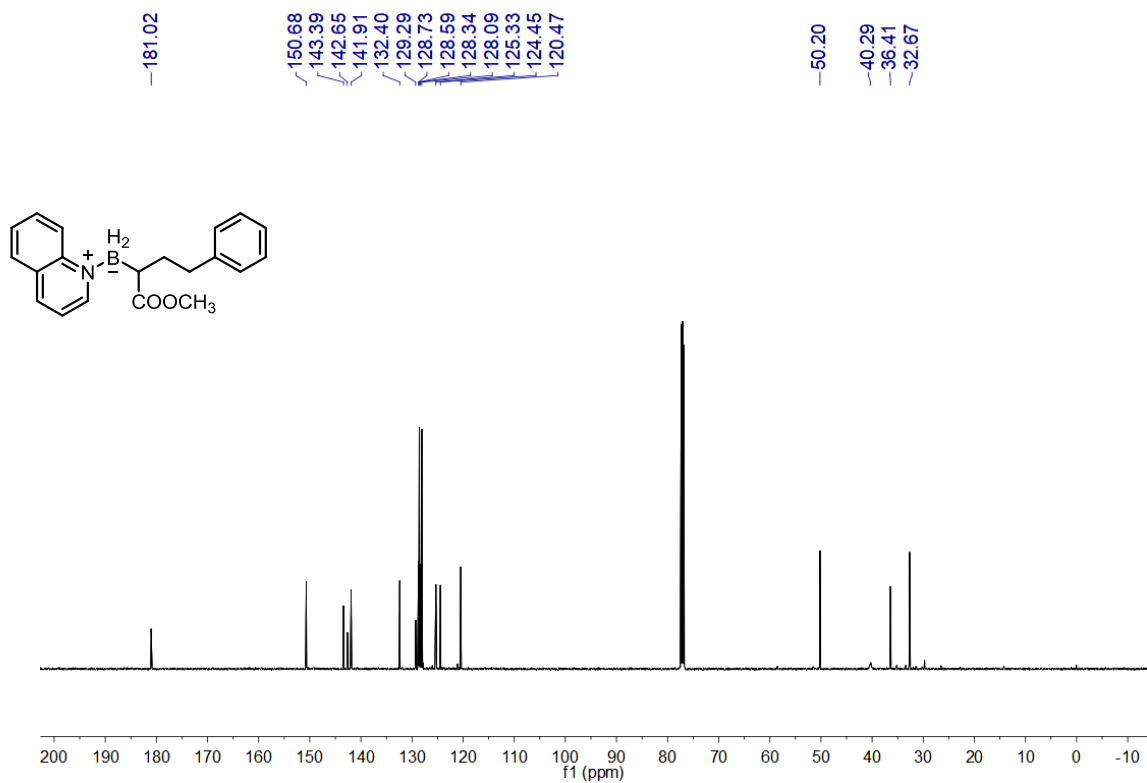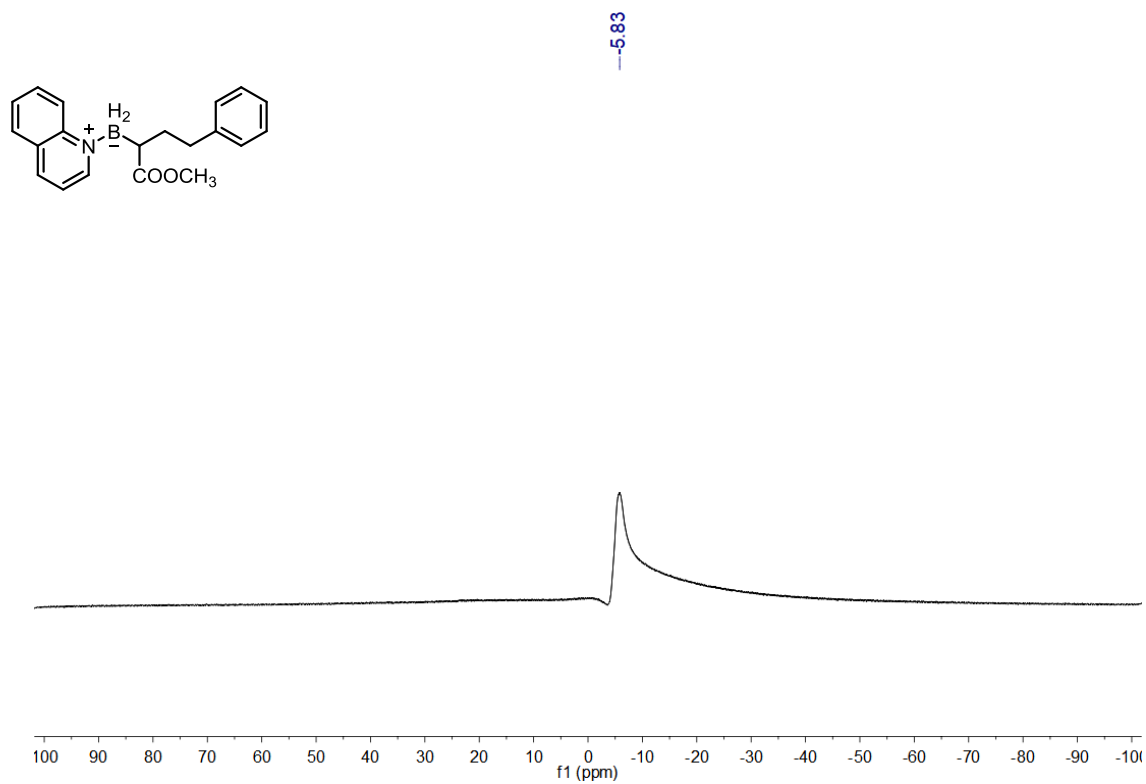

$^1\text{H}$  NMR (500 MHz,  $\text{CDCl}_3$ ),  $^{13}\text{C}$  NMR (126 MHz,  $\text{CDCl}_3$ ) &  $^{11}\text{B}$  NMR (160 MHz,  $\text{CDCl}_3$ )  
for **6c**

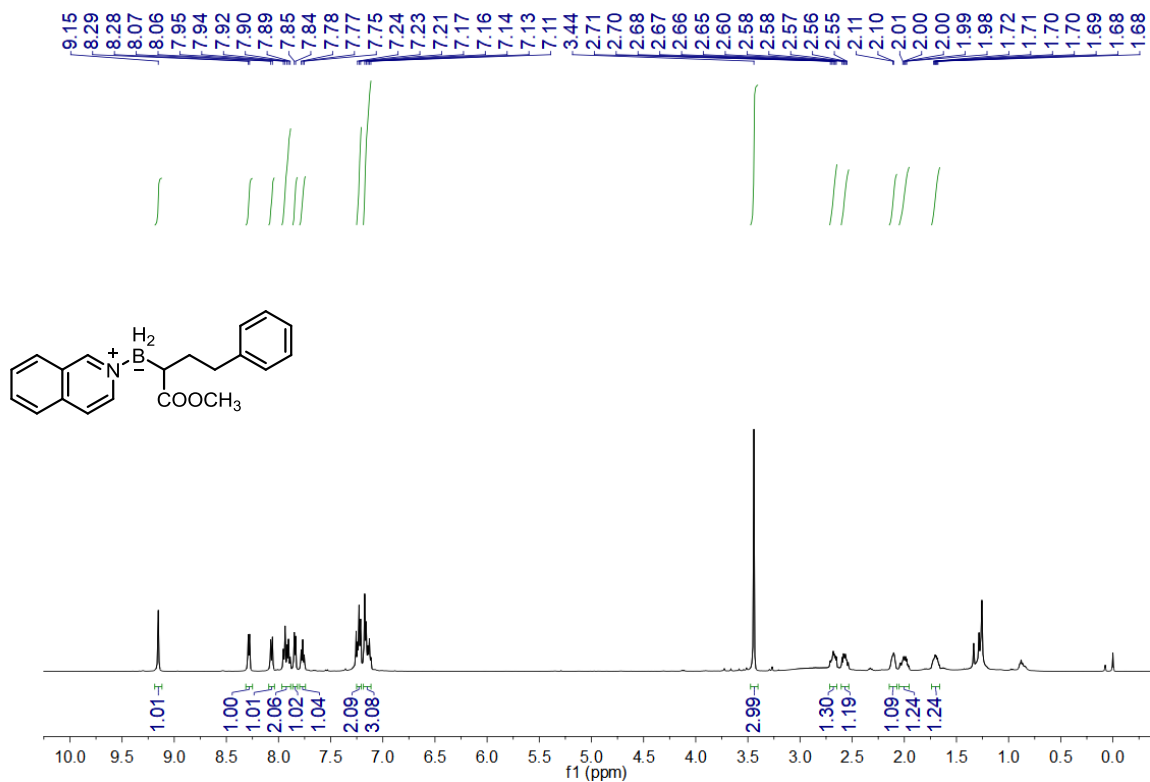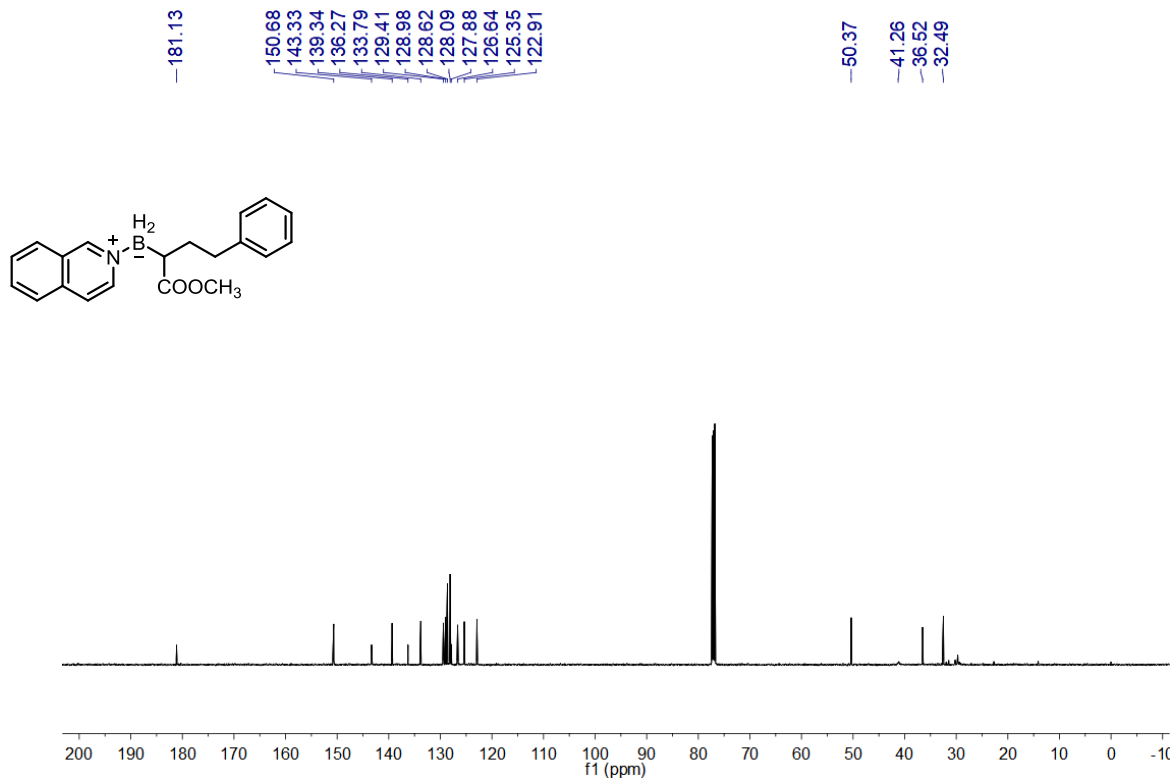

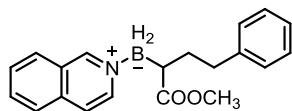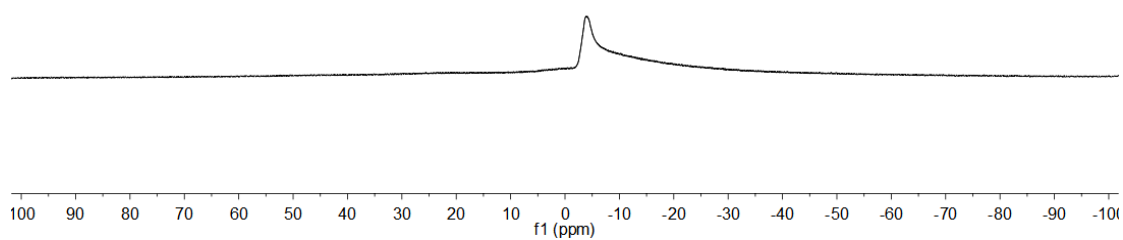

-3.87

<sup>1</sup>H NMR (500 MHz, CDCl<sub>3</sub>), <sup>13</sup>C NMR (126 MHz, CDCl<sub>3</sub>) & <sup>11</sup>B NMR (160 MHz, CDCl<sub>3</sub>)  
for **1d**

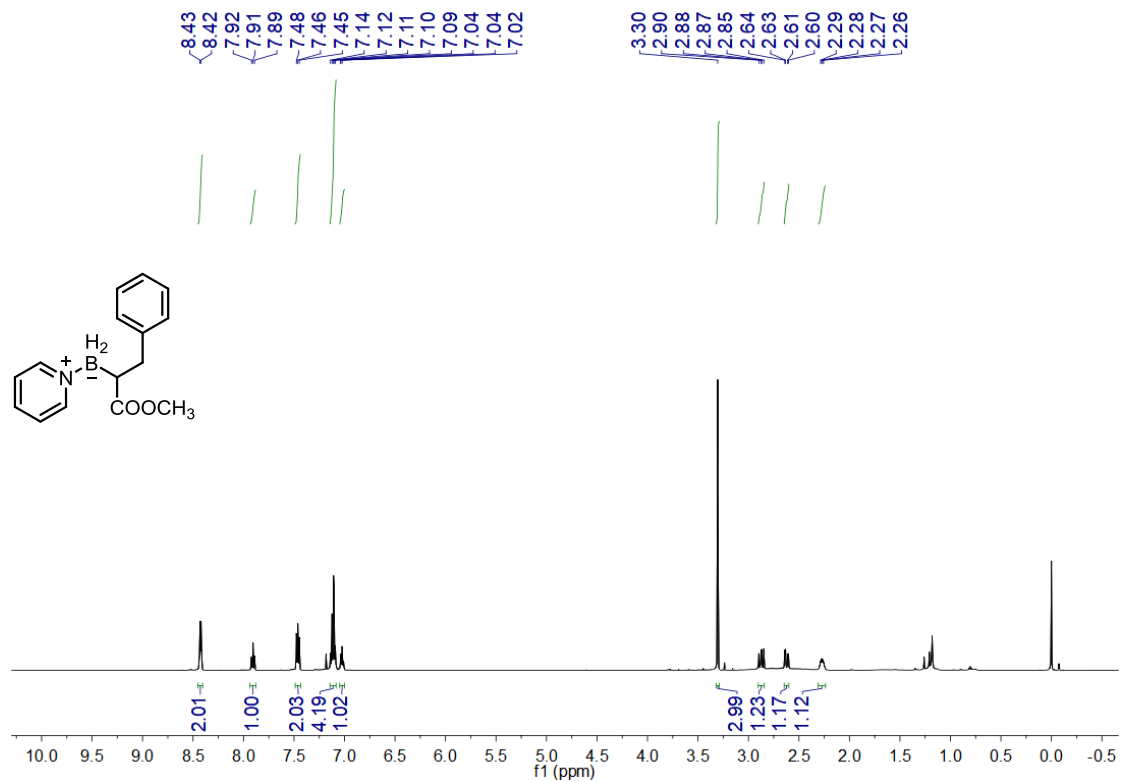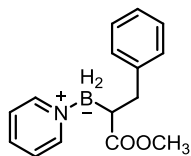

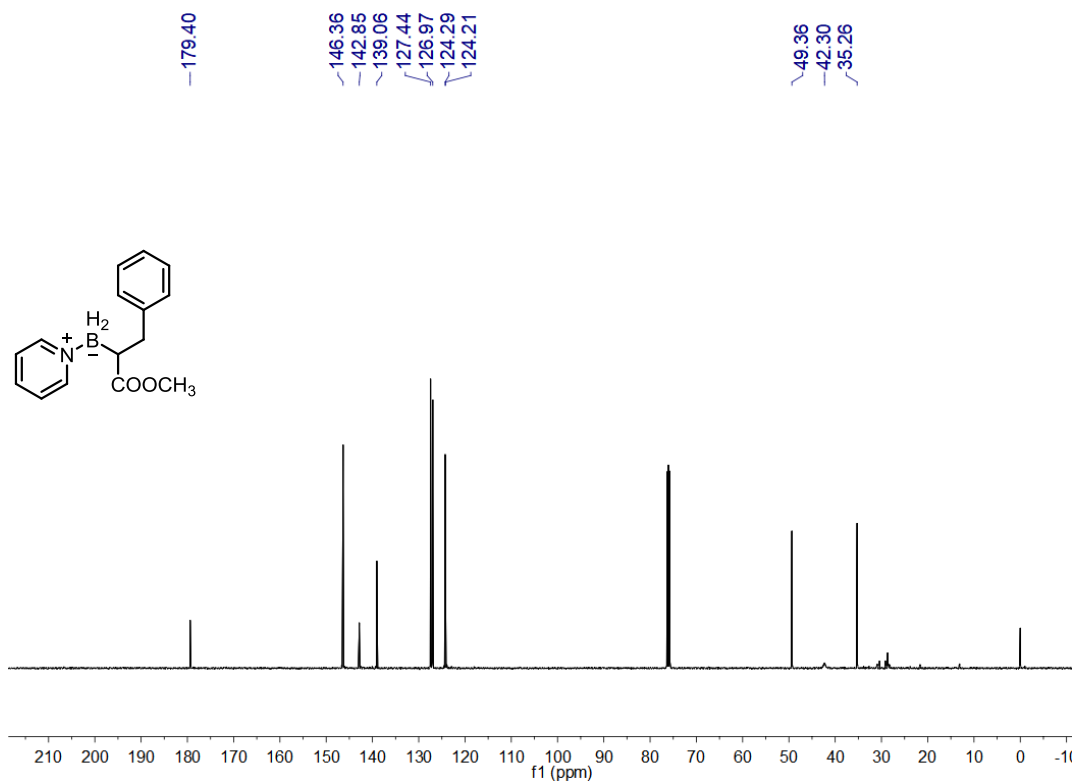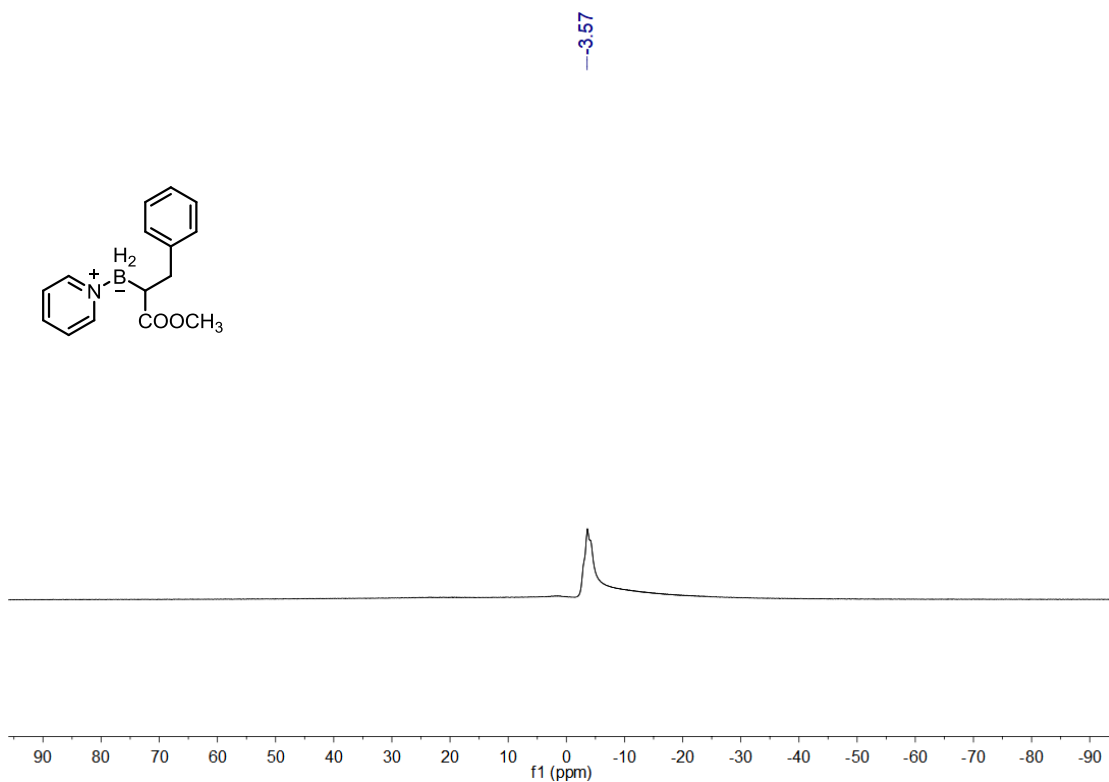

$^1\text{H}$  NMR (500 MHz,  $\text{CDCl}_3$ ),  $^{13}\text{C}$  NMR (126 MHz,  $\text{CDCl}_3$ ) &  $^{11}\text{B}$  NMR (160 MHz,  $\text{CDCl}_3$ )  
for **2d**

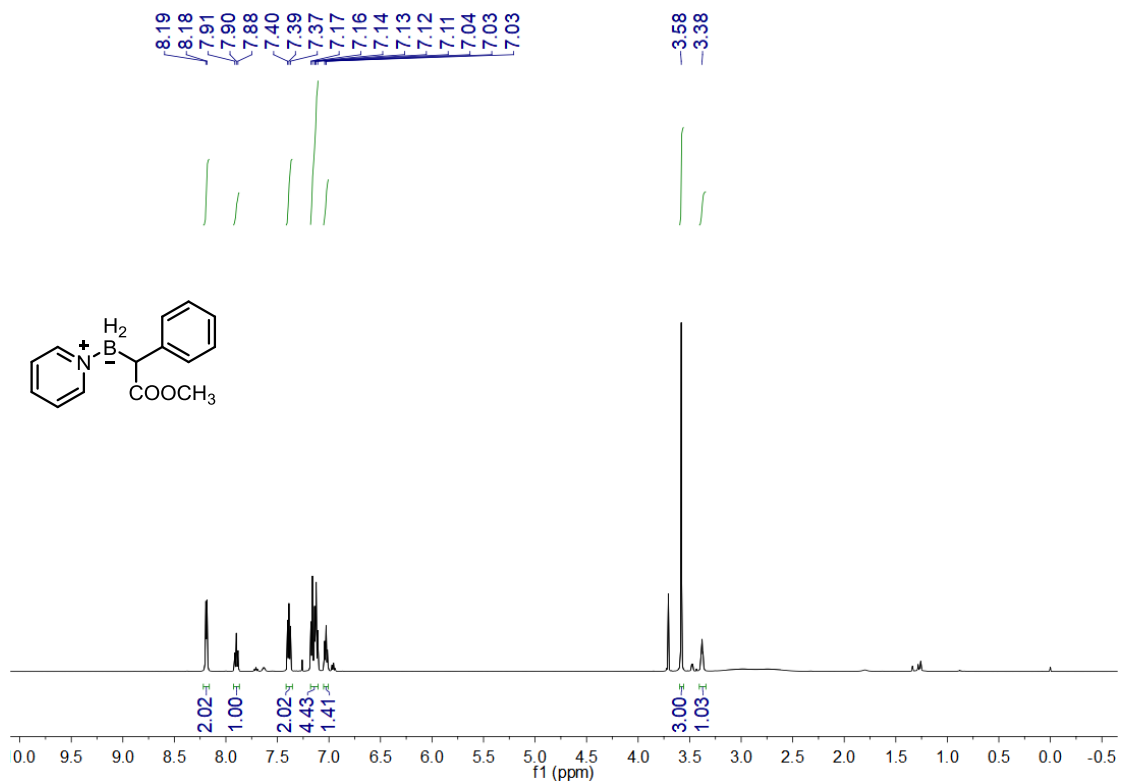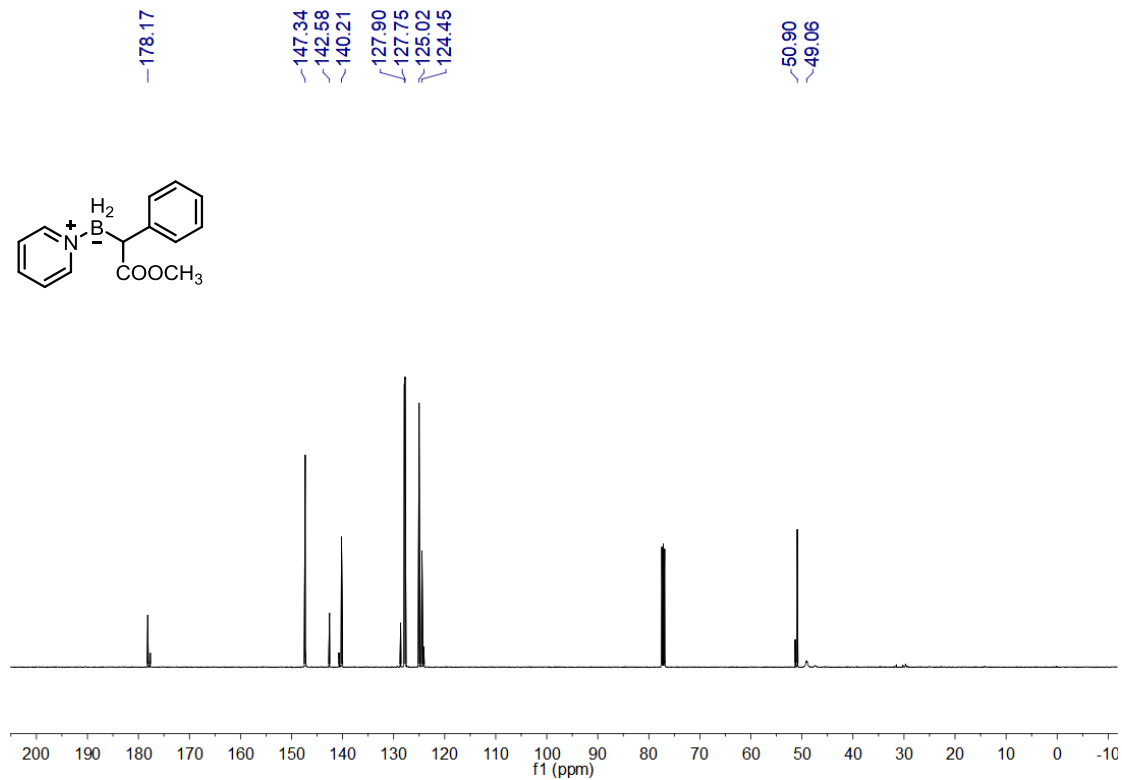

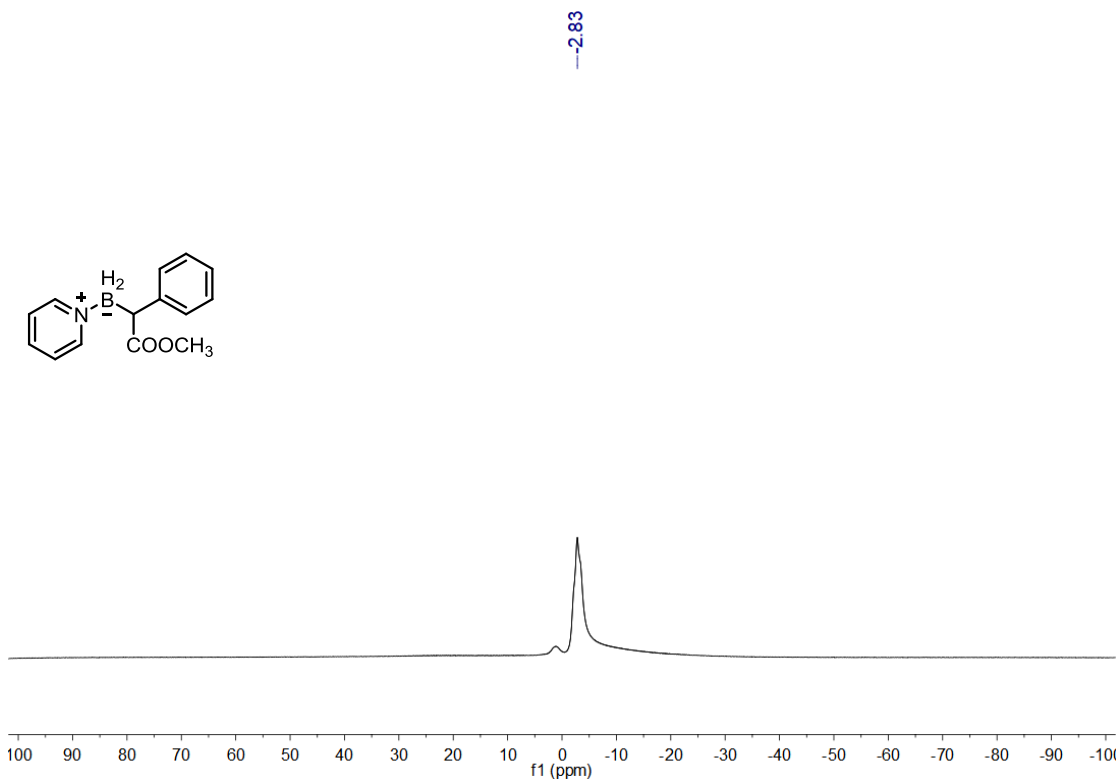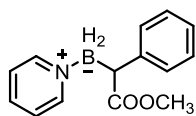

<sup>1</sup>H NMR (500 MHz, CDCl<sub>3</sub>), <sup>13</sup>C NMR (126 MHz, CDCl<sub>3</sub>) & <sup>11</sup>B NMR (160 MHz, CDCl<sub>3</sub>)  
for **3d**

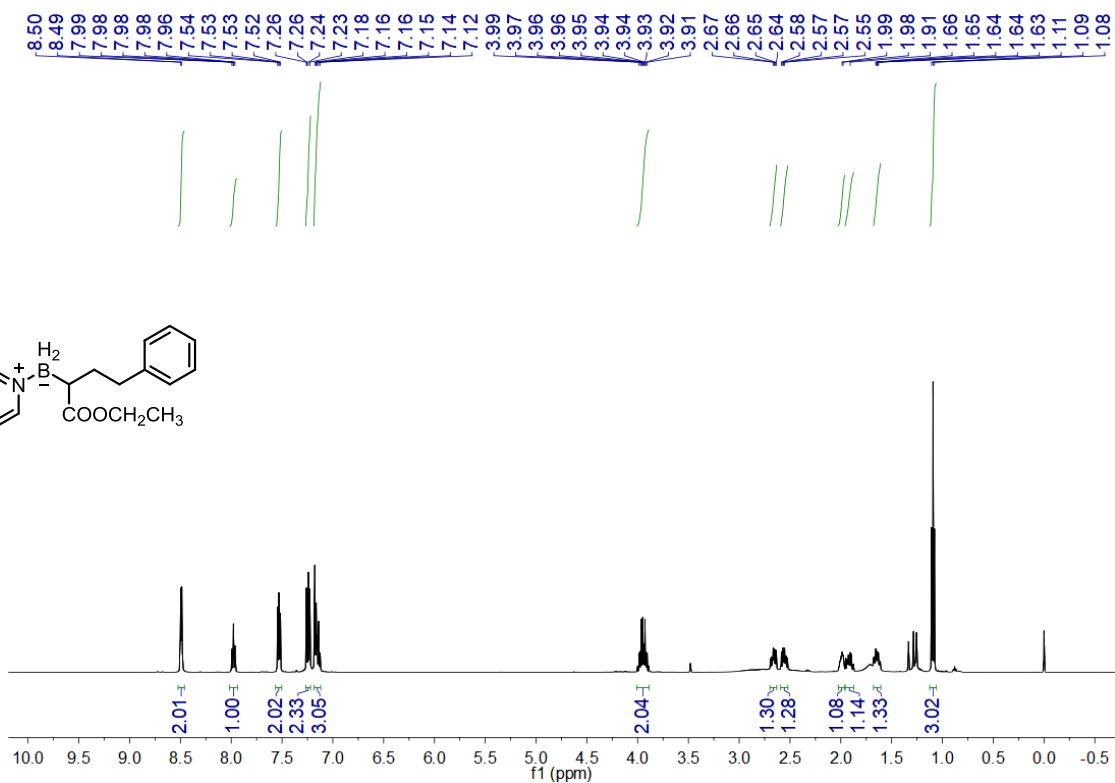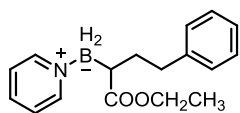

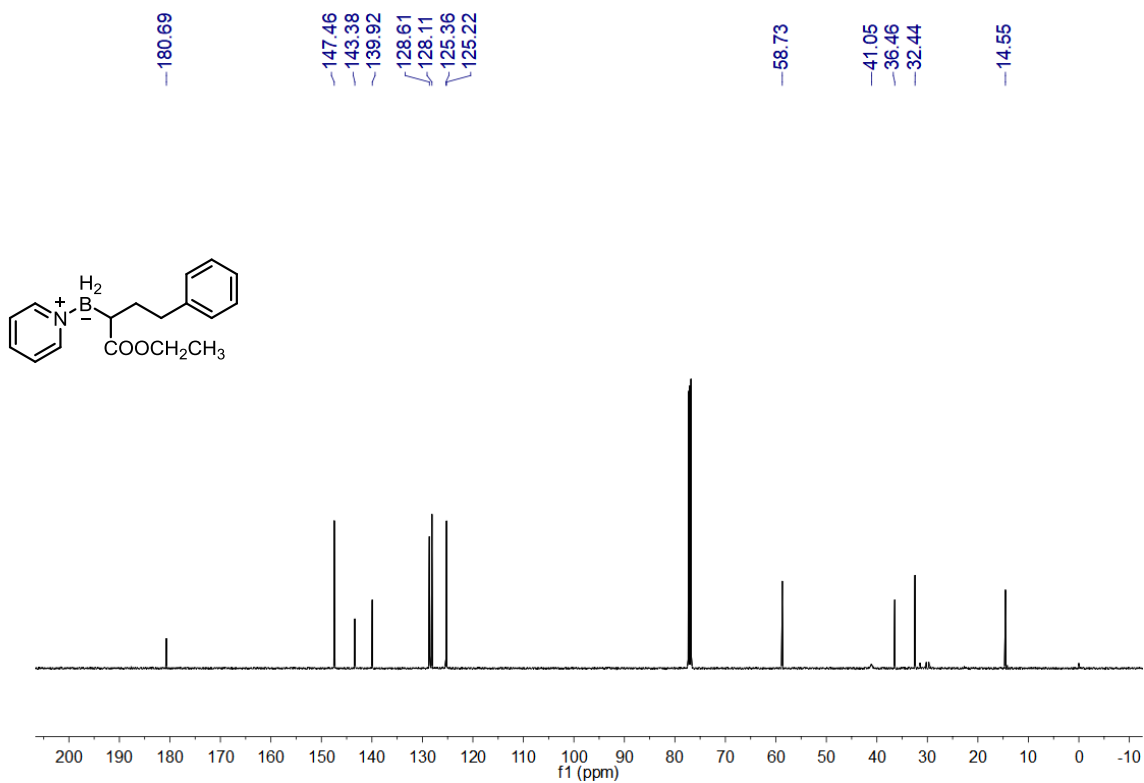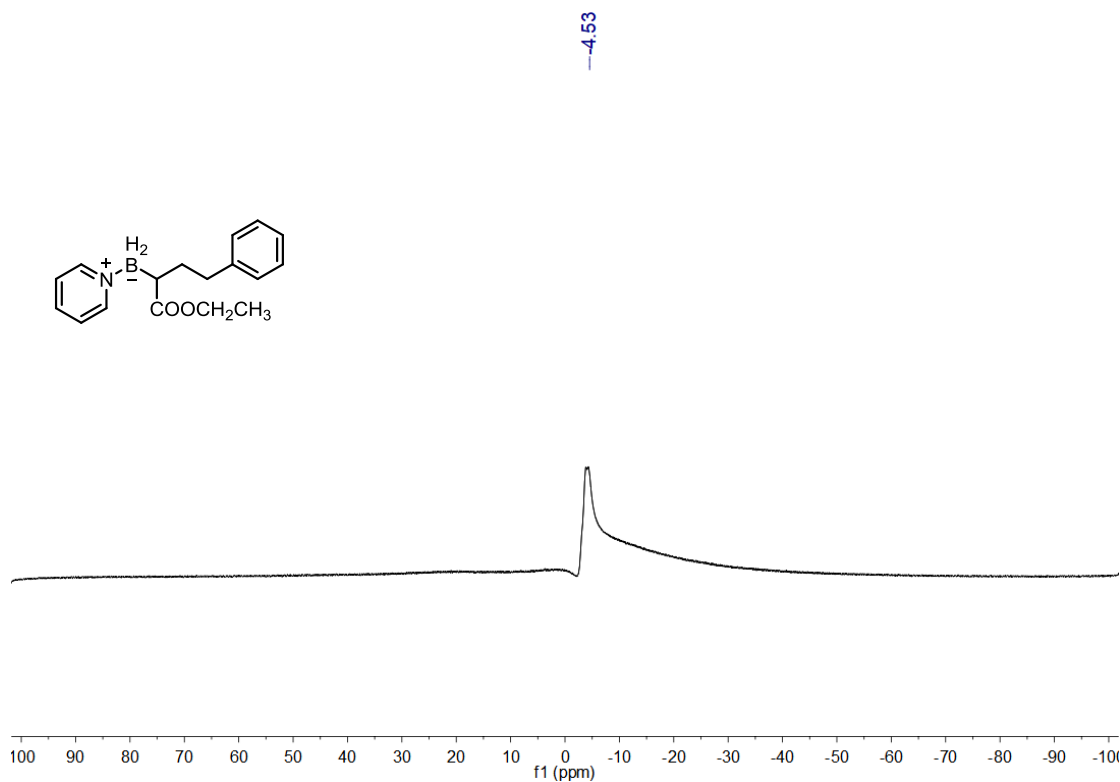

$^1\text{H}$  NMR (500 MHz,  $\text{CDCl}_3$ ),  $^{13}\text{C}$  NMR (126 MHz,  $\text{CD}_3\text{OD}$ ) &  $^{11}\text{B}$  NMR (160 MHz,  $\text{CD}_3\text{OD}$ )  
for **4d**.

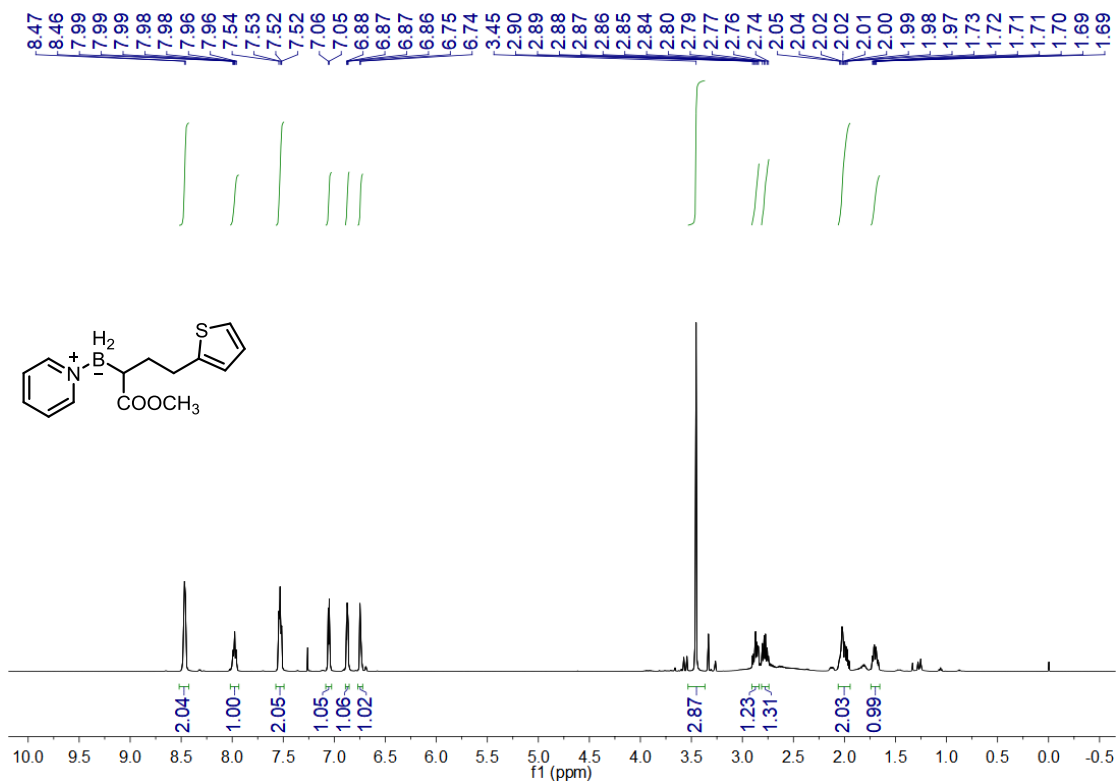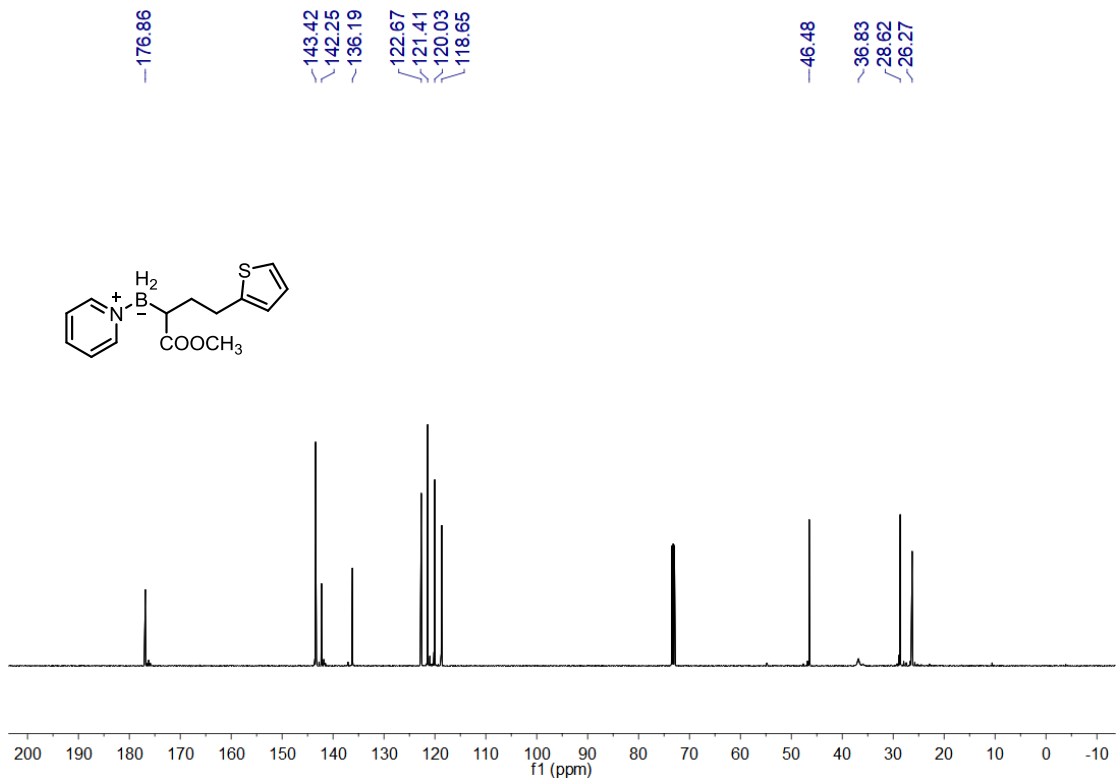

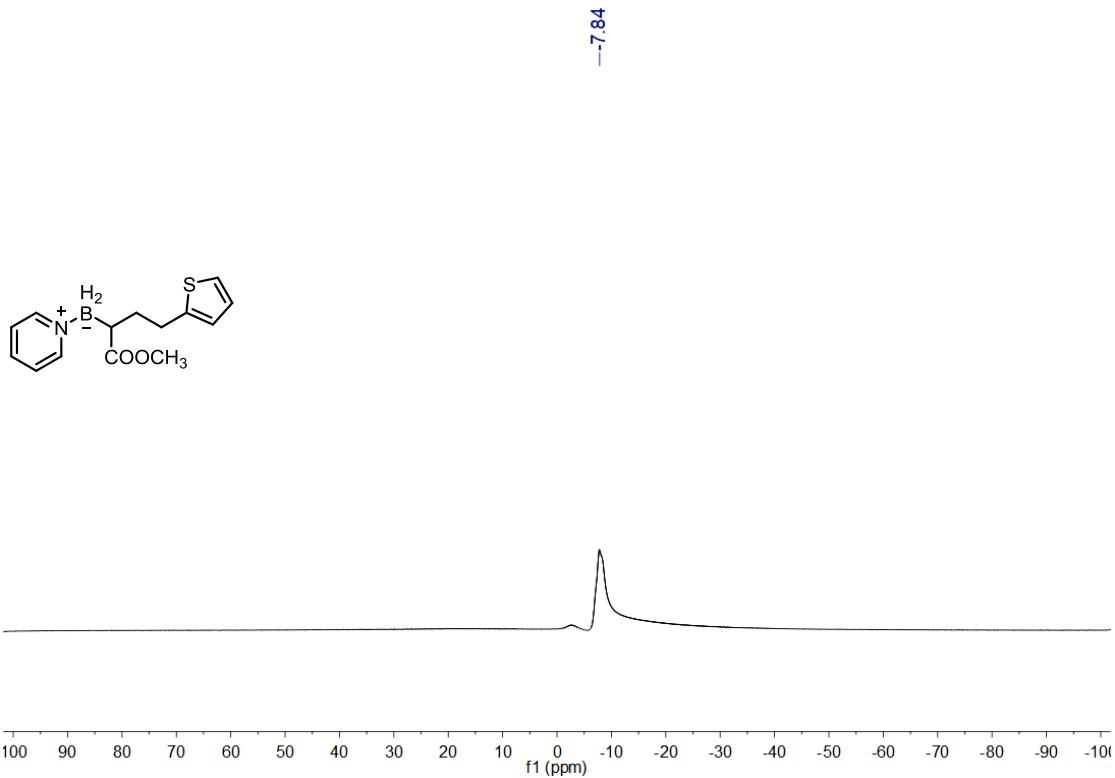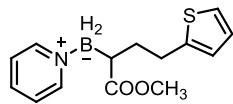

**5d.**  $^1\text{H}$  NMR (500 MHz,  $\text{CDCl}_3$ ),  $^{13}\text{C}$  NMR (126 MHz,  $\text{CDCl}_3$ ),  $^{11}\text{B}$  NMR (160 MHz,  $\text{CDCl}_3$ ) for

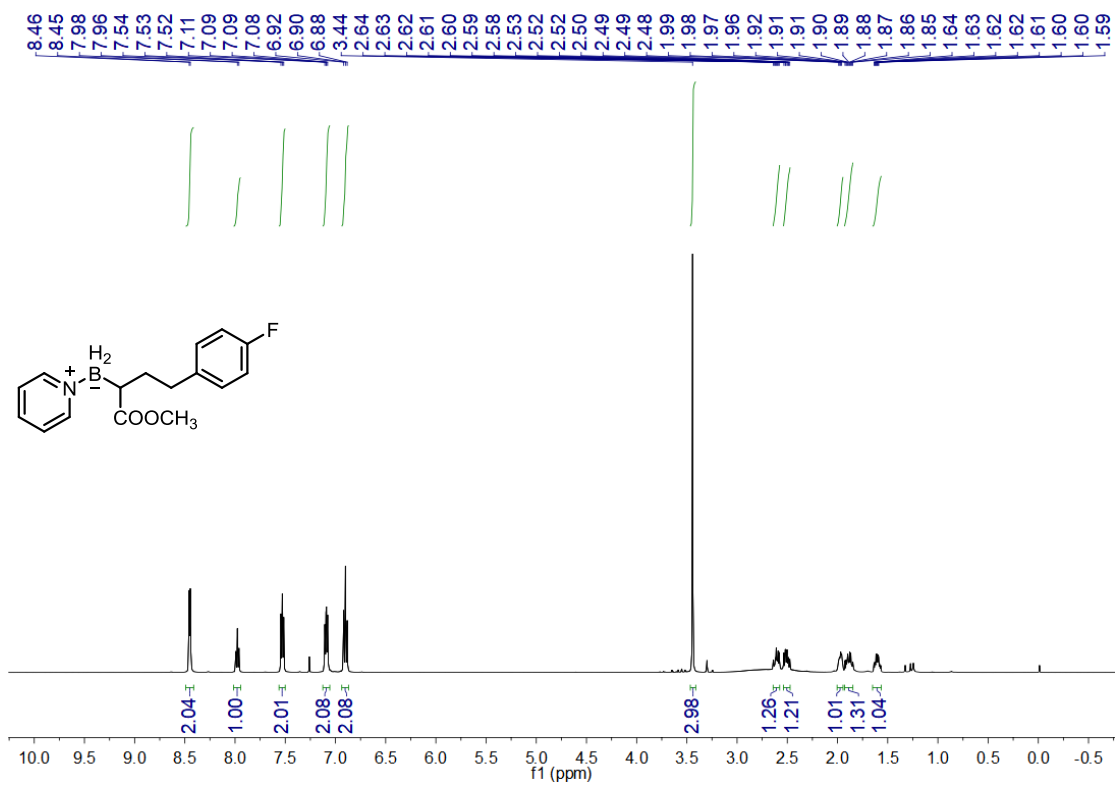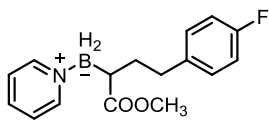

180.93  
162.00  
160.07  
147.34  
140.09  
138.81  
129.89  
129.82  
125.32  
114.83  
114.66  
50.38  
40.90  
35.56  
32.49

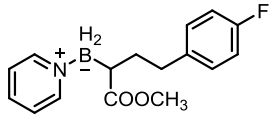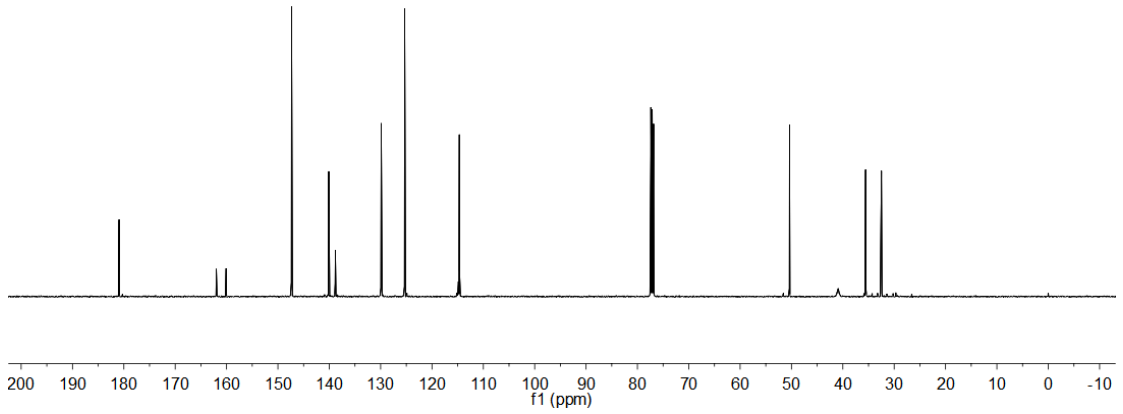

-3.77

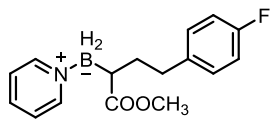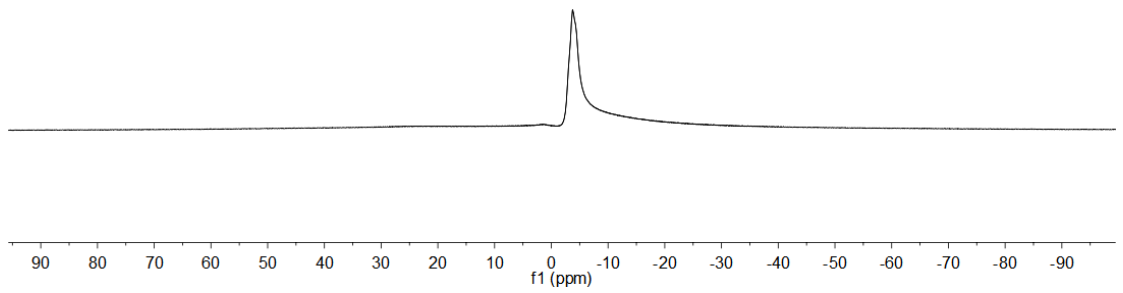

$^1\text{H}$  NMR (500 MHz,  $\text{CDCl}_3$ ),  $^{13}\text{C}$  NMR (126 MHz,  $\text{CDCl}_3$ ) &  $^{11}\text{B}$  NMR (160 MHz,  $\text{CDCl}_3$ )  
for **6d**.

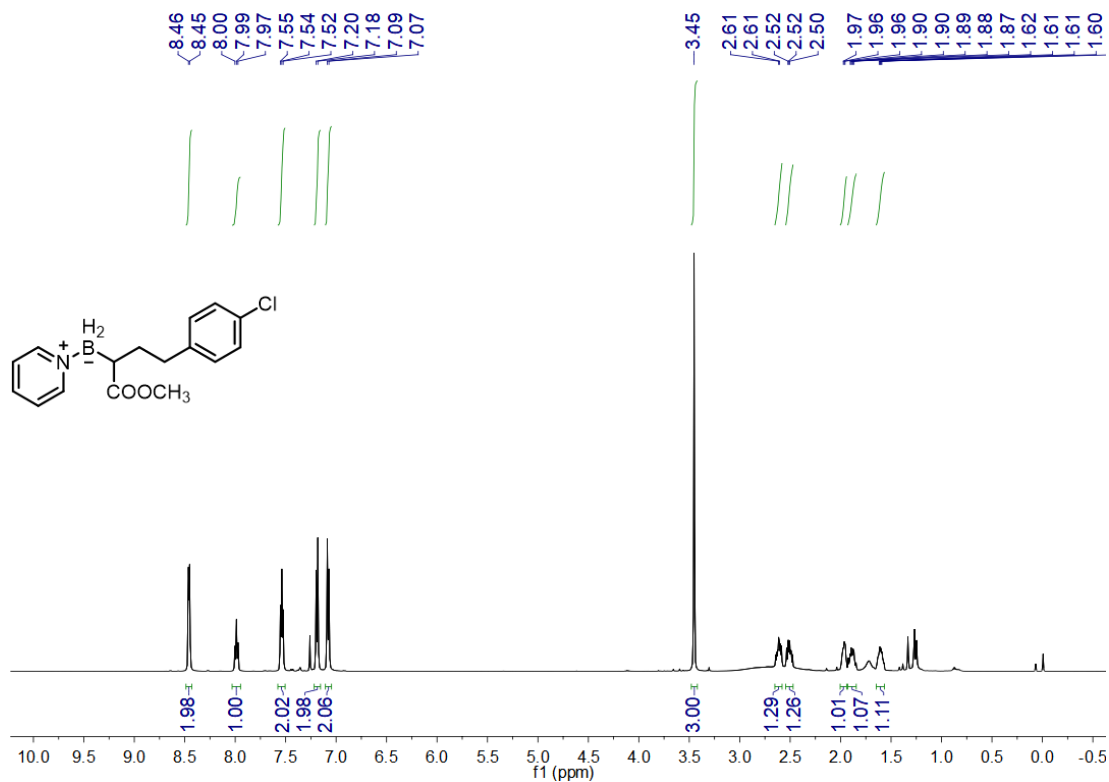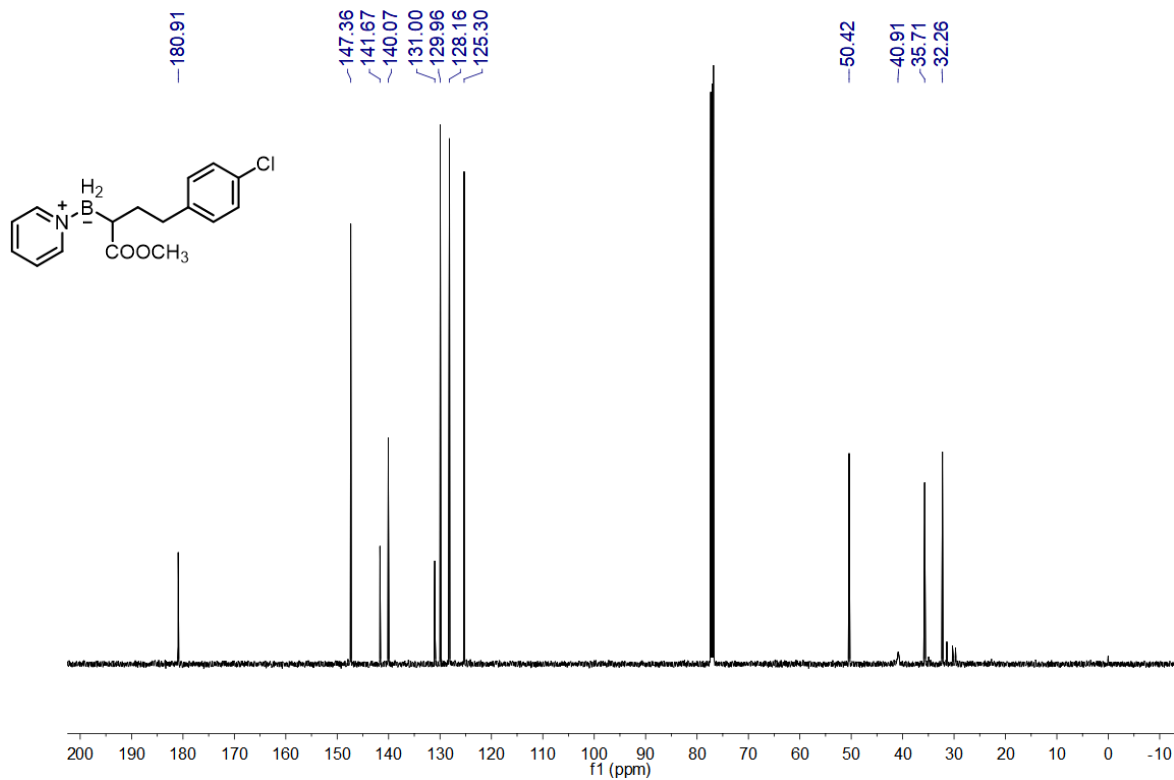

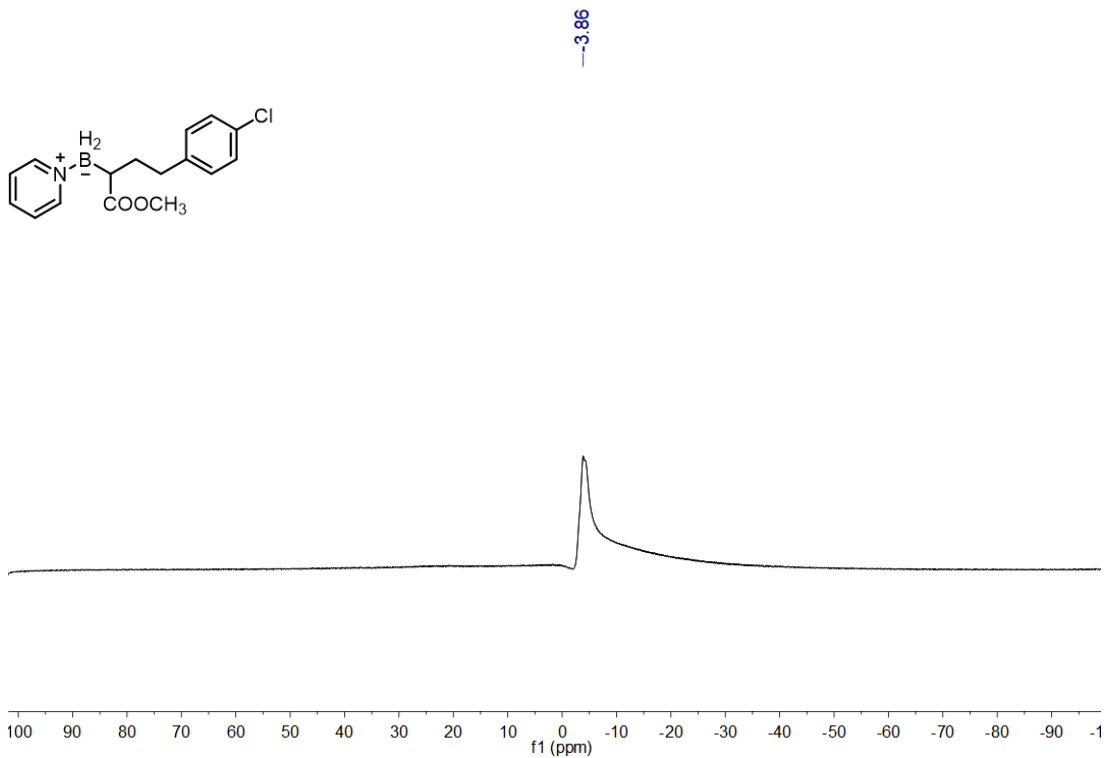

<sup>1</sup>H NMR (500 MHz, CDCl<sub>3</sub>), <sup>13</sup>C NMR (126 MHz, CDCl<sub>3</sub>) & <sup>11</sup>B NMR (160 MHz, CDCl<sub>3</sub>)  
for **7d**.

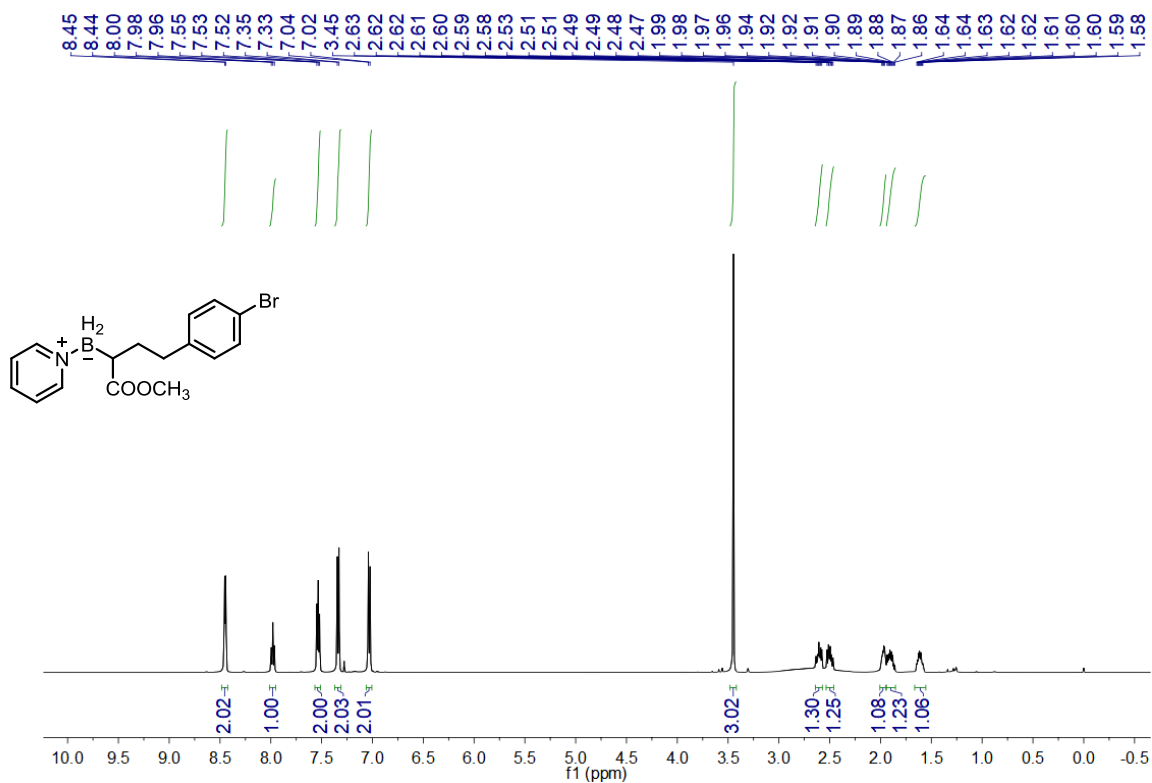

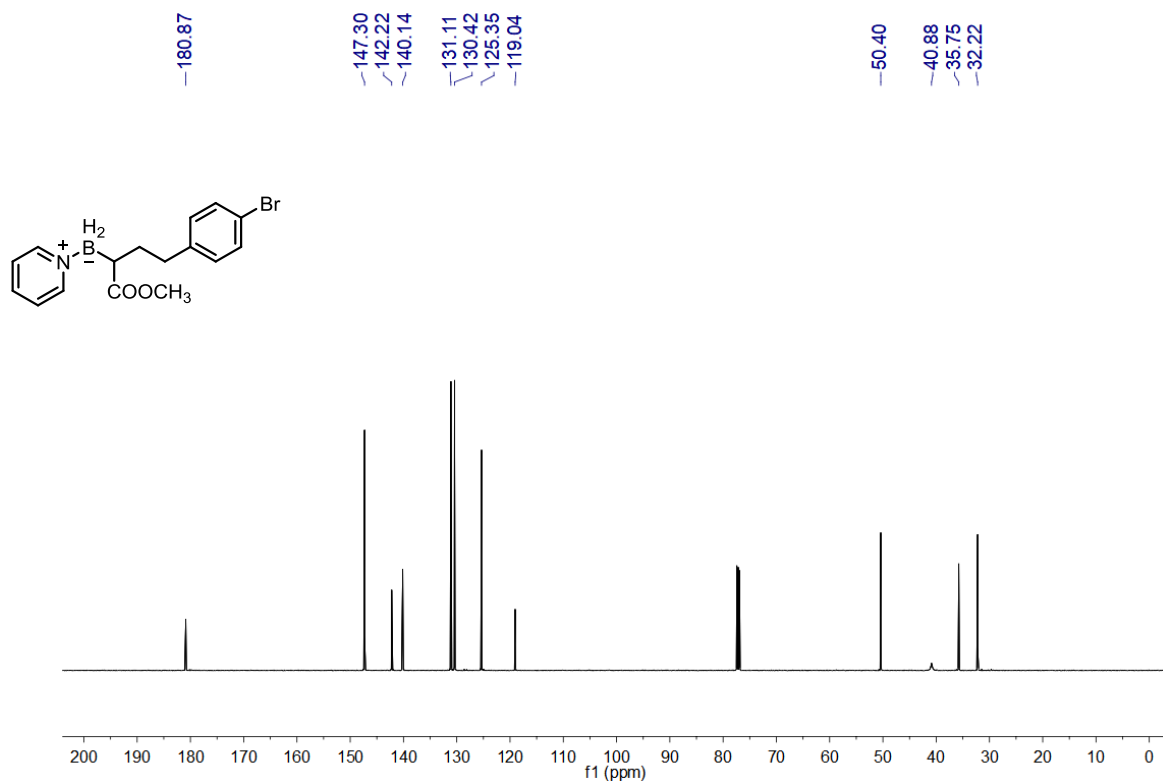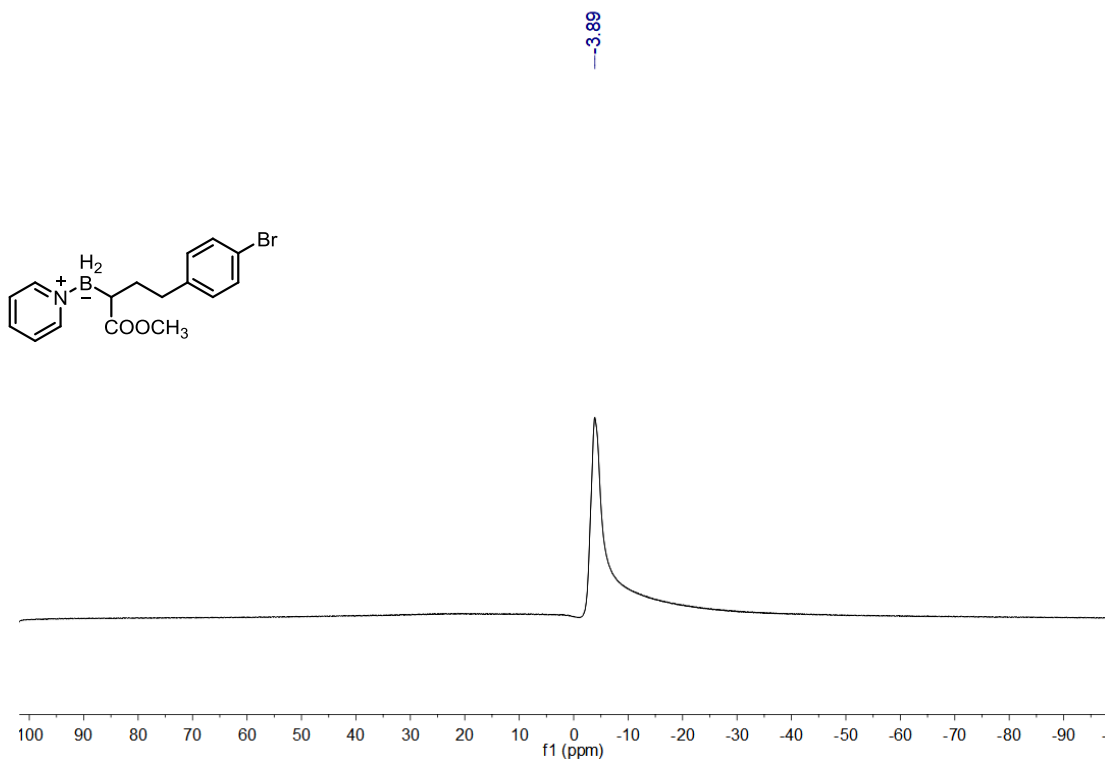

$^1\text{H}$  NMR (500 MHz,  $\text{CDCl}_3$ ),  $^{13}\text{C}$  NMR (126 MHz,  $\text{CDCl}_3$ ) &  $^{11}\text{B}$  NMR (160 MHz,  $\text{CDCl}_3$ )  
for **8d**.

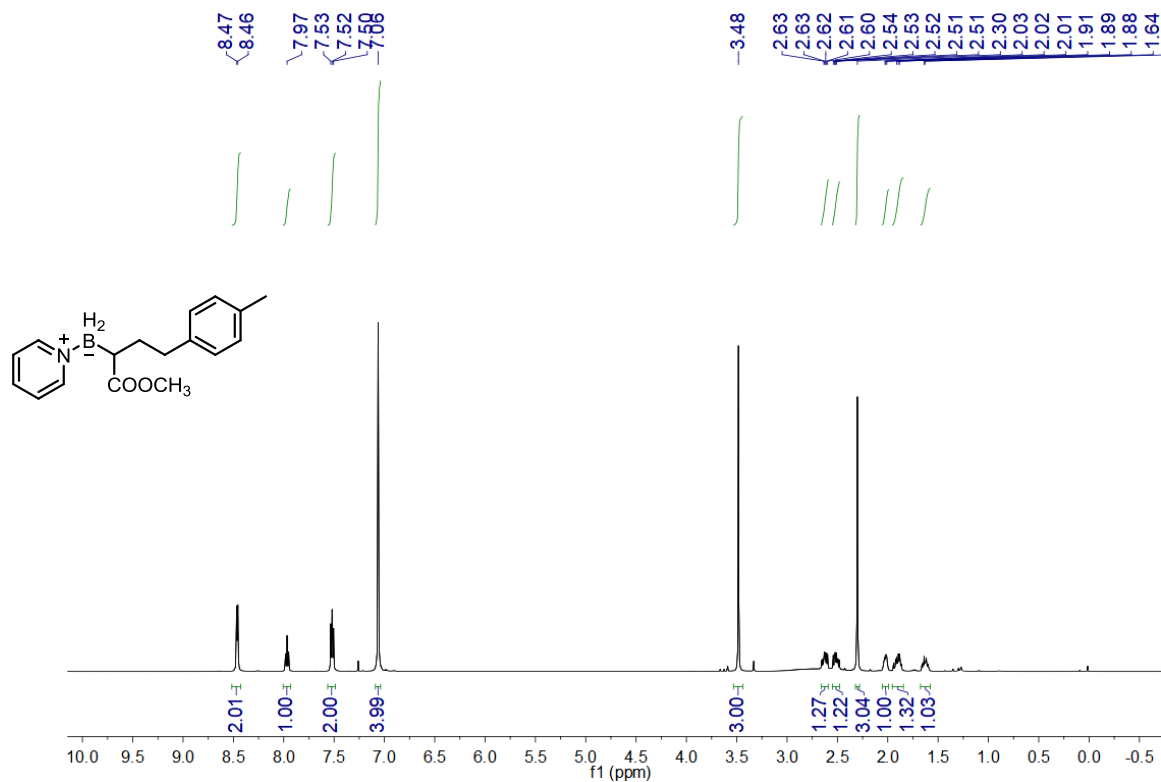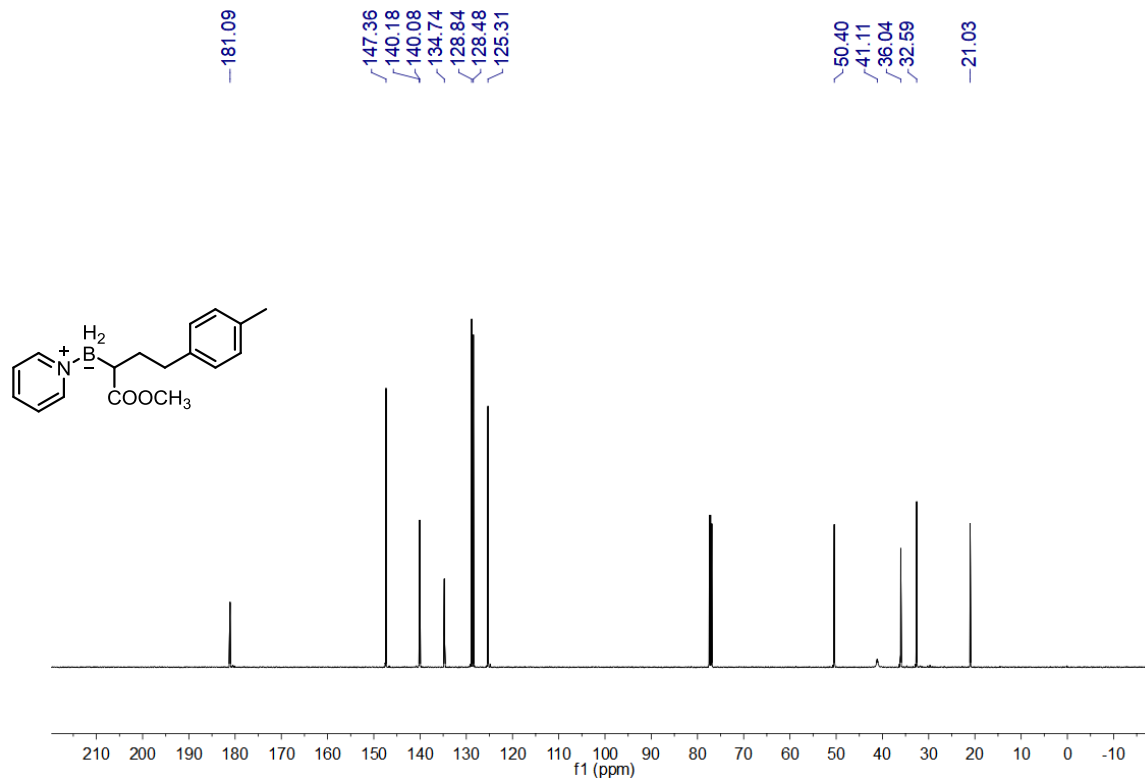

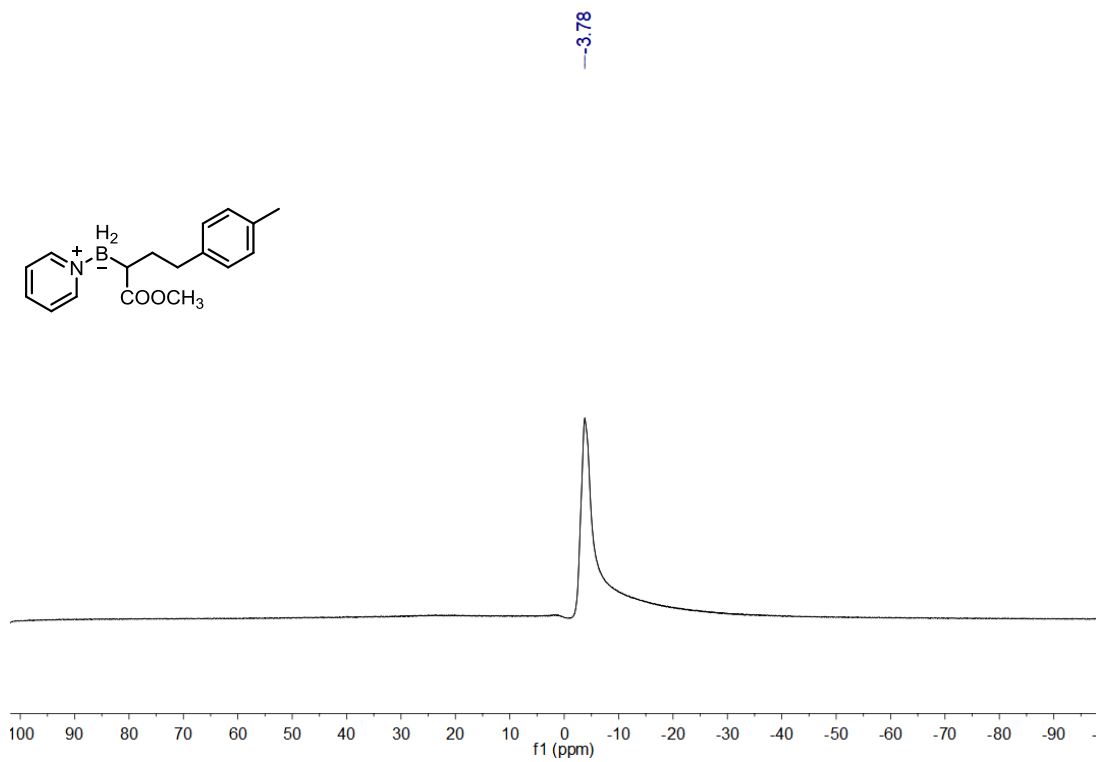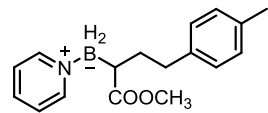

<sup>1</sup>H NMR (500 MHz, CDCl<sub>3</sub>), <sup>13</sup>C NMR (126 MHz, CDCl<sub>3</sub>) & <sup>11</sup>B NMR (160 MHz, CDCl<sub>3</sub>)  
for **9d**.

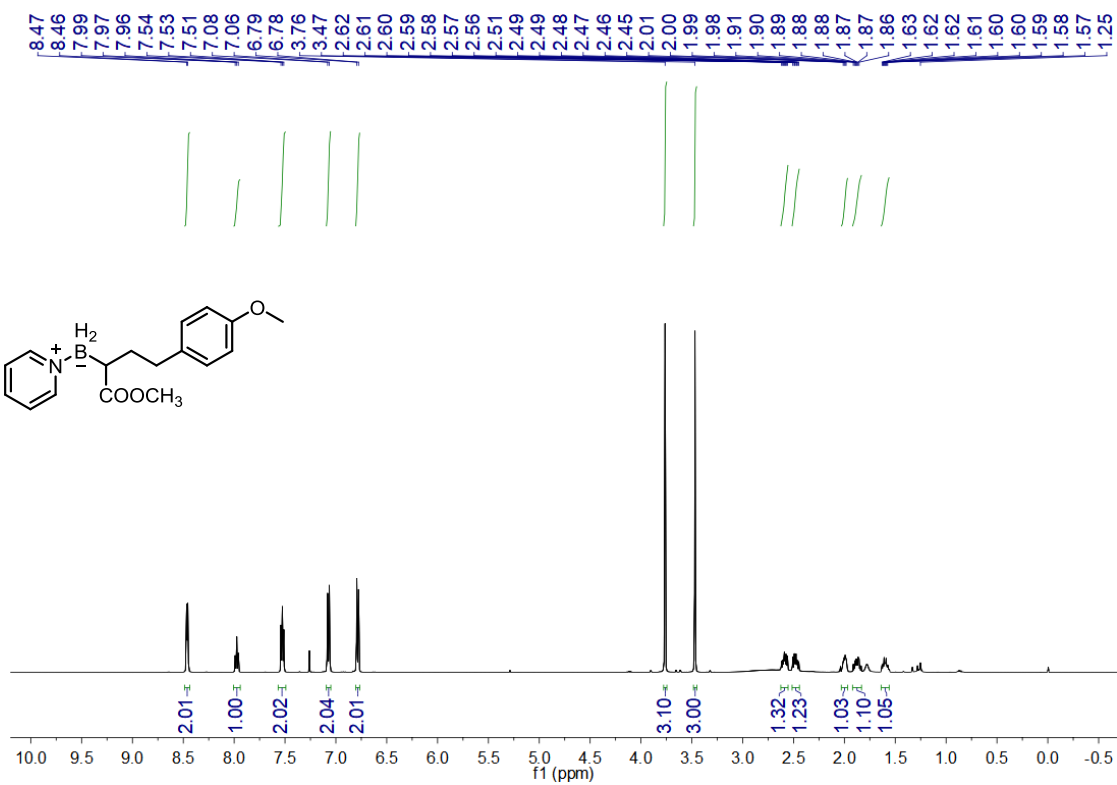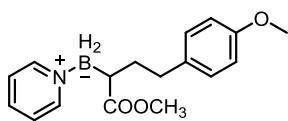

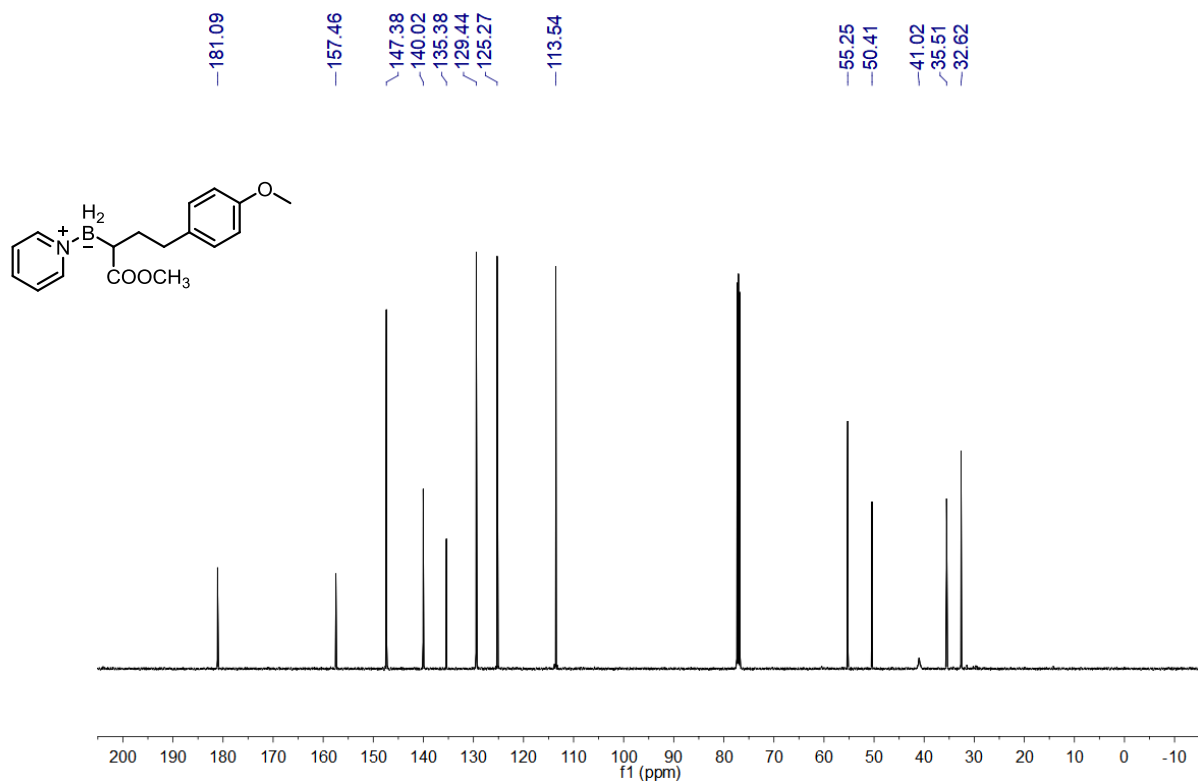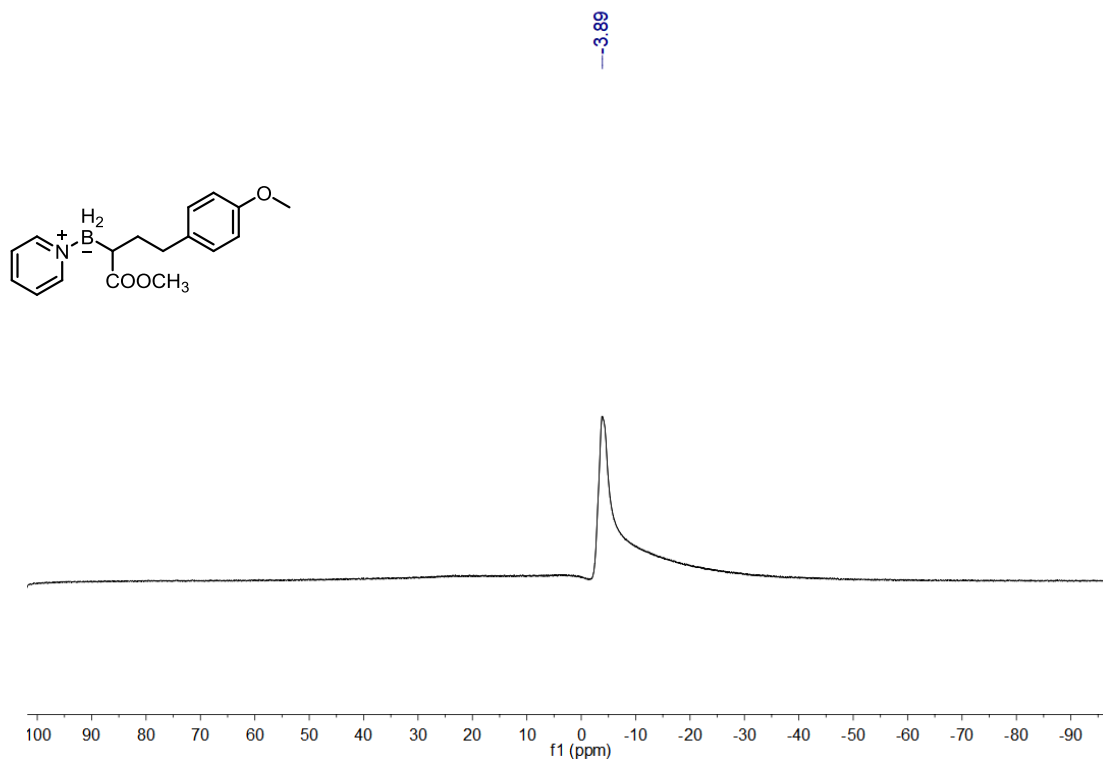

$^1\text{H}$  NMR (500 MHz,  $\text{CDCl}_3$ ),  $^{13}\text{C}$  NMR (126 MHz,  $\text{CDCl}_3$ ) &  $^{11}\text{B}$  NMR (160 MHz,  $\text{CDCl}_3$ )  
for **10d**.

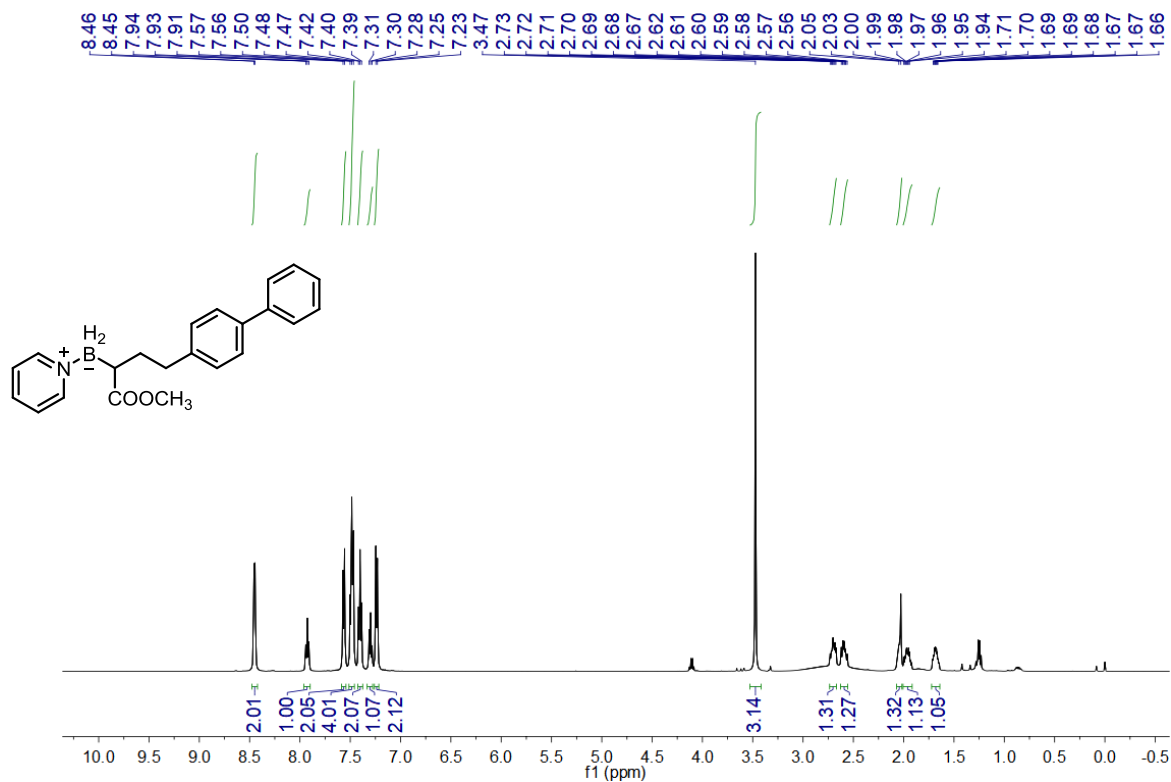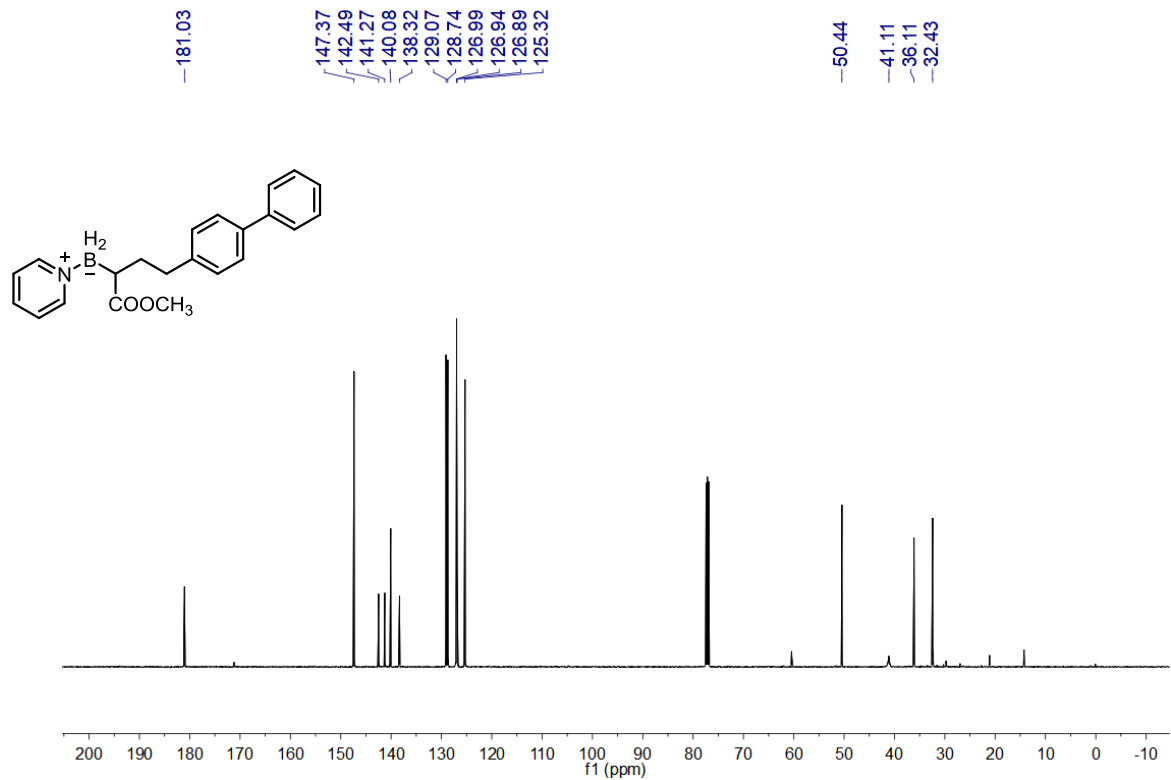



## References

1. Gao, S. Q.; Yuan, H.; Liu, X. C.; Li, L.; Tan, X.; Wen, G. B.; Lin, Y. W., The X-ray crystal structure of human A15C neuroglobin reveals both native/de novo disulfide bonds and unexpected ligand-binding sites. *Proteins* **2022**, *90* (5), 1152-1158.
2. Humphrey, W.; Dalke, A.; Schulten, K., VMD: Visual molecular dynamics. *J. Mol. Graph.* **1996**, *14* (1), 33-38.
3. Lewis, R. D.; Garcia-Borràs, M.; Chalkley, M. J.; Buller, A. R.; Houk, K. N.; Kan, S. B. J.; Arnold, F. H., Catalytic iron-carbene intermediate revealed in a cytochrome c carbene transferase. *Proc. Natl. Acad. Sci.* **2018**, *115* (28), 7308-7313.
4. Kalé, L.; Skeel, R.; Bhandarkar, M.; Brunner, R.; Gursoy, A.; Krawetz, N.; Phillips, J.; Shinozaki, A.; Varadarajan, K.; Schulten, K., NAMD2: Greater Scalability for Parallel Molecular Dynamics. *Journal of Computational Physics* **1999**, *151* (1), 283-312.
5. Morris, G. M.; Huey, R.; Lindstrom, W.; Sanner, M. F.; Belew, R. K.; Goodsell, D. S.; Olson, A. J., AutoDock4 and AutoDockTools4: Automated docking with selective receptor flexibility. *J. Comput. Chem.* **2009**, *30* (16), 2785-91.
6. Kan, S. B. J.; Huang, X.; Gumulya, Y.; Chen, K.; Arnold, F. H., Genetically programmed chiral organoborane synthesis. *Nature* **2017**, *552* (7683), 132-136.
7. Sun, L. J.; Wang, H.; Xu, J. K.; Niu, W.; Gao, S. Q.; Lin, Y. W., Engineering Neuroglobin for Synthesis of Chiral Organoborons via Carbene B-H Insertion. *Org. Lett.* **2024**, *26* (41), 8872-8877.
